# Supplementary material for: Do two oxidants (ferric-peroxo and ferryl-oxo species) act in the biosynthesis of estrogens? A DFT calculation
Source: Royal Society of Chemistry journal article supplement (doi:10.1039/c8ra01252k), 2018-01-01
Supplement: c8ra01252k1.pdf [file c8ra01252k1.pdf]

Electronic Supplementary Material (ESI) for RSC Advances.

**Do the dual oxidants (ferric-peroxo and ferryl-oxo species) act in the  
biosynthesis of estrogens? A DFT calculation**

**Xiang-Yun Wang,<sup>a</sup> Hui-Min Yan,<sup>a</sup> Yan-Li Han,<sup>a</sup> Zhu-Xia Zhang,<sup>a</sup> Xiao-Yun Zhang,<sup>a</sup> Wen-Jing  
Yang,<sup>a</sup> Zhen Guo<sup>\*a</sup> and Yan-Rong Li<sup>\*b</sup>**

<sup>a</sup> *College of Material Science & Engineering, Taiyuan University of Technology, Shanxi,  
030024, P. R. China. E-mail: guozhen@tyut.edu.cn.*

<sup>b</sup> *Department of Earth Sciences and Engineering, Taiyuan University of Technology, Shanxi  
030024, P. R. China. E-mail: li.dennis@hotmail.com*

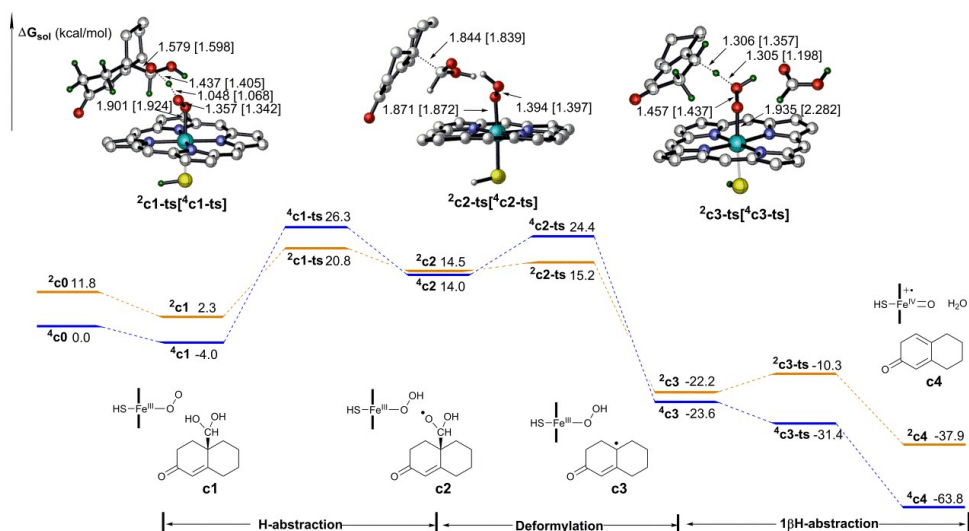

Fig. S1 DFT calculated energy diagram for the the aromatized reaction by ferric-peroxo species in doublet and quartet states (in square brackets), followed by the computed key structures of transition states and intermediates with selected bond distances.

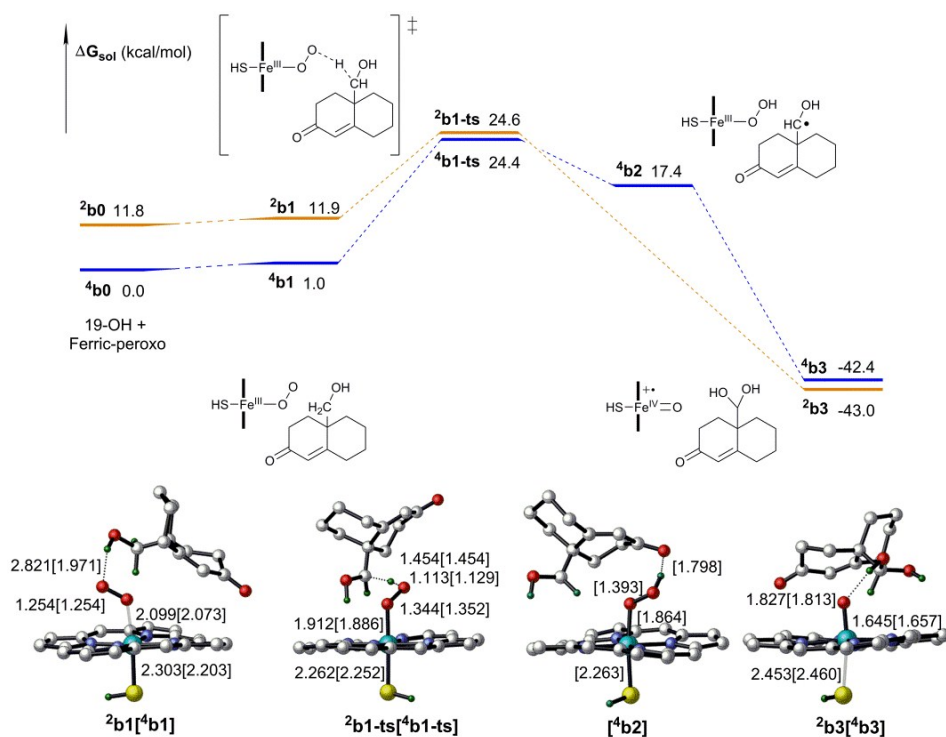

Fig. S2 DFT calculated energy diagram for the oxidation of 19-OH androgen by ferric-peroxo species in doublet and quartet states without a free energy correction of -2.6 kcal/mol.

## Cartesian Coordinates of optimized Structures

$$\Delta G_{\text{solv}} = \Delta E_{\text{solv}}(\text{SMD}) + \Delta G_{\text{correction}}$$

$\Delta E_{\text{solv}}$  refers to the solvation single point energy by M06/6-311+G(d,p): Sdd level of theory.

$\Delta G_{\text{correction}}$  refers to the thermal correction to the free energy of the solute in the gas phase by M06L/6-311G(d) level of theory.

1. Coordinates of all stationary points in Fig. 2

### RC<sub>1</sub>

Charge = 0 Multiplicity = 1

|   |          |          |          |
|---|----------|----------|----------|
| H | -0.441   | -1.89293 | -1.21416 |
| C | -0.25747 | -1.55933 | -0.18085 |
| C | 0.27918  | -0.11061 | -0.20982 |
| C | -1.55848 | -1.68208 | 0.59352  |
| H | 0.52754  | -2.21236 | 0.2157   |
| C | -0.82314 | 0.89783  | -0.43736 |
| C | 1.03245  | 0.28506  | 1.07415  |
| C | 1.20833  | -0.119   | -1.41333 |
| C | -2.62089 | -0.73408 | 0.07988  |
| H | -1.94935 | -2.7029  | 0.56554  |
| C | -0.33136 | 2.30073  | -0.599   |
| C | -2.12737 | 0.58111  | -0.35266 |
| C | 1.53071  | 1.72486  | 1.00935  |
| H | 1.85517  | -0.41352 | 1.2513   |
| H | 0.34531  | 0.16629  | 1.92311  |
| O | 2.93066  | -2.33373 | 0.62658  |
| O | -3.80682 | -1.00591 | 0.09436  |
| C | 0.416    | 2.70929  | 0.67933  |
| H | 0.36331  | 2.37012  | -1.45203 |
| H | -1.15807 | 2.98686  | -0.80984 |
| H | -2.89128 | 1.33908  | -0.52765 |
| H | 2.00564  | 1.99626  | 1.95876  |
| H | 2.3222   | 1.79906  | 0.25103  |
| H | -0.30497 | 2.74751  | 1.50764  |
| H | 0.81307  | 3.72485  | 0.56983  |
| H | 3.59206  | -3.00008 | 0.42691  |
| O | 2.39103  | -0.36079 | -1.38628 |
| H | 3.01049  | -1.65881 | -0.06179 |
| H | 0.69712  | 0.03907  | -2.39614 |
| H | -1.3938  | -1.44783 | 1.65522  |

$$\Delta E_{\text{solv}} = -654.247142659$$

$$\Delta G_{\text{correction}} = 0.213196$$

**RC<sub>2</sub>**

Charge = 0 Multiplicity = 1

|   |          |          |          |
|---|----------|----------|----------|
| H | -0.26206 | -2.18909 | -0.2504  |
| C | -0.51606 | -1.50732 | 0.57392  |
| C | -0.03974 | -0.09197 | 0.21103  |
| C | -2.00629 | -1.61473 | 0.84055  |
| H | 0.06272  | -1.85713 | 1.43357  |
| C | -1.07045 | 0.66886  | -0.61141 |
| C | 0.29245  | 0.73415  | 1.47733  |
| C | 1.18829  | -0.22792 | -0.68581 |
| C | -2.81889 | -1.07655 | -0.31435 |
| H | -2.30959 | -2.64504 | 1.04618  |
| C | -0.70835 | 2.08033  | -0.94748 |
| C | -2.28355 | 0.1574   | -0.90032 |
| C | 0.55601  | 2.21448  | 1.22636  |
| H | 1.14705  | 0.25848  | 1.9711   |
| H | -0.56502 | 0.62694  | 2.1582   |
| O | 2.54787  | -1.68813 | 0.98784  |
| O | -3.87457 | -1.5663  | -0.67112 |
| C | -0.52006 | 2.85666  | 0.3635   |
| H | 0.22575  | 2.12879  | -1.5213  |
| H | -1.49197 | 2.5342   | -1.56275 |
| H | -2.97838 | 0.72688  | -1.51831 |
| H | 0.62715  | 2.73371  | 2.18973  |
| H | 1.52931  | 2.33394  | 0.74194  |
| H | -1.47837 | 2.87543  | 0.90229  |
| H | -0.26958 | 3.90093  | 0.14464  |
| H | 2.52897  | -2.63107 | 1.16572  |
| O | 2.03616  | 0.61836  | -0.85743 |
| H | 3.73016  | -0.20255 | -1.17741 |
| H | 1.22477  | -1.18271 | -1.26113 |
| H | -2.28082 | -1.03017 | 1.73132  |
| O | 4.33647  | -0.93611 | -0.98443 |
| H | 3.31945  | -1.53532 | 0.40968  |
| H | 4.43288  | -1.42922 | -1.80192 |

 $\Delta E_{\text{solv}} = -730.680550499$  $\Delta G_{\text{correction}} = 0.23521$

**RC<sub>3</sub>**

Charge = 0 Multiplicity = 1

|   |          |          |          |
|---|----------|----------|----------|
| H | -0.62531 | -2.15894 | -0.46547 |
| C | -0.92201 | -1.57597 | 0.41894  |
| C | -0.44214 | -0.12728 | 0.23878  |
| C | -2.42174 | -1.72101 | 0.60081  |
| H | -0.38037 | -2.0155  | 1.26077  |
| C | -1.44454 | 0.71753  | -0.53855 |
| C | -0.1845  | 0.55413  | 1.6044   |
| C | 0.82184  | -0.15068 | -0.61918 |
| C | -3.18635 | -1.06071 | -0.52235 |
| H | -2.72261 | -2.76968 | 0.67547  |
| C | -1.08883 | 2.16209  | -0.69498 |
| C | -2.63807 | 0.23511  | -0.93835 |
| C | 0.08434  | 2.05258  | 1.53184  |
| H | 0.63997  | 0.02341  | 2.0915   |
| H | -1.07946 | 0.37549  | 2.21901  |
| O | 1.98184  | -1.75412 | 0.9712   |
| O | -4.21934 | -1.5122  | -0.98158 |
| C | -0.95863 | 2.78595  | 0.70162  |
| H | -0.13615 | 2.28464  | -1.22483 |
| H | -1.85607 | 2.67624  | -1.28302 |
| H | -3.31166 | 0.8684   | -1.51657 |
| H | 0.1123   | 2.46122  | 2.54923  |
| H | 1.07673  | 2.22522  | 1.10521  |
| H | -1.93797 | 2.74157  | 1.19962  |
| H | -0.70737 | 3.84911  | 0.61211  |
| H | 1.94373  | -2.67115 | 0.68946  |
| O | 1.63745  | 0.74375  | -0.6912  |
| H | 3.19479  | 0.49129  | -1.57543 |
| H | 0.89418  | -1.03019 | -1.29763 |
| H | -2.74277 | -1.2424  | 1.5381   |
| O | 4.1145   | 0.27105  | -1.81634 |
| H | 4.56452  | 1.11034  | -1.93399 |
| H | 4.53601  | -0.58111 | -0.36077 |
| O | 4.57051  | -1.07366 | 0.48718  |
| H | 2.92649  | -1.49364 | 0.8944   |
| H | 5.21521  | -1.77349 | 0.37095  |

 $\Delta E_{\text{solv}} = -807.118983917$  $\Delta G_{\text{correction}} = 0.259378$

**TS<sub>1</sub>**Charge = 0 Multiplicity = 1 **TS<sub>1</sub> = -1920.10i cm<sup>-1</sup>**

|   |          |          |          |
|---|----------|----------|----------|
| H | -0.90907 | -2.13823 | -0.40074 |
| C | -0.75914 | -1.50201 | 0.48481  |
| C | 0.25742  | -0.40443 | 0.13328  |
| C | -2.1142  | -0.97834 | 0.92061  |
| H | -0.32105 | -2.15515 | 1.24764  |
| C | -0.39818 | 0.76912  | -0.57379 |
| C | 0.97565  | 0.13004  | 1.39301  |
| C | 1.24602  | -1.02608 | -0.8591  |
| C | -2.70446 | -0.04827 | -0.11642 |
| H | -2.82102 | -1.78816 | 1.12154  |
| C | 0.51636  | 1.89978  | -0.92082 |
| C | -1.73294 | 0.85607  | -0.74057 |
| C | 1.8337   | 1.37122  | 1.16287  |
| H | 1.57433  | -0.68078 | 1.82536  |
| H | 0.1958   | 0.35832  | 2.13422  |
| O | 1.93447  | -2.3639  | -0.06632 |
| O | -3.89791 | 0.01001  | -0.34883 |
| C | 1.09618  | 2.45423  | 0.38927  |
| H | 1.34378  | 1.5614   | -1.55559 |
| H | -0.0297  | 2.67693  | -1.46552 |
| H | -2.15763 | 1.7051   | -1.27691 |
| H | 2.16694  | 1.76131  | 2.13239  |
| H | 2.73449  | 1.08923  | 0.61226  |
| H | 0.27307  | 2.86151  | 0.99425  |
| H | 1.76503  | 3.2952   | 0.17359  |
| H | 1.79518  | -3.17576 | -0.57306 |
| O | 2.41938  | -0.5131  | -1.1109  |
| H | 2.76107  | -1.6344  | -0.5587  |
| H | 0.70795  | -1.5193  | -1.69888 |
| H | -2.025   | -0.40916 | 1.85764  |

 $\Delta E_{\text{solv}} = -654.180103384$  $\Delta G_{\text{correction}} = 0.214035$

**TS<sub>2</sub>**Charge = 0 Multiplicity = 1 **TS<sub>2</sub> = -1524.16i cm<sup>-1</sup>**

|   |          |          |          |
|---|----------|----------|----------|
| H | -0.56802 | -2.22961 | -0.08848 |
| C | -0.72396 | -1.47438 | 0.69888  |
| C | -0.00983 | -0.17642 | 0.2819   |
| C | -2.21918 | -1.33534 | 0.91126  |
| H | -0.2443  | -1.86893 | 1.60211  |
| C | -0.88042 | 0.67371  | -0.62692 |
| C | 0.36673  | 0.66764  | 1.52134  |
| C | 1.24748  | -0.58833 | -0.51424 |
| C | -2.89429 | -0.75534 | -0.31144 |
| H | -2.6871  | -2.29072 | 1.16491  |
| C | -0.31563 | 2.00101  | -1.02161 |
| C | -2.14661 | 0.33263  | -0.94525 |
| C | 0.85784  | 2.07757  | 1.20944  |
| H | 1.11574  | 0.11369  | 2.09847  |
| H | -0.53006 | 0.72852  | 2.15632  |
| O | 2.05843  | -1.66082 | 0.54811  |
| O | -4.00428 | -1.0972  | -0.67799 |
| C | -0.07192 | 2.81531  | 0.25734  |
| H | 0.63573  | 1.88262  | -1.54998 |
| H | -1.01174 | 2.52279  | -1.687   |
| H | -2.71925 | 0.95917  | -1.62978 |
| H | 0.95868  | 2.63814  | 2.14713  |
| H | 1.85624  | 2.0214   | 0.76867  |
| H | -1.03934 | 3.00554  | 0.74516  |
| H | 0.33993  | 3.79784  | -0.00088 |
| H | 1.64432  | -2.52805 | 0.47492  |
| O | 2.11783  | 0.29876  | -0.83512 |
| H | 3.29455  | -0.32473 | -0.95891 |
| H | 0.97549  | -1.33816 | -1.29467 |
| H | -2.42512 | -0.65745 | 1.75256  |
| O | 4.03544  | -1.11531 | -0.66539 |
| H | 3.21312  | -1.60214 | -0.0015  |
| H | 4.27058  | -1.6616  | -1.42014 |

 $\Delta E_{\text{solv}} = -730.639154226$  $\Delta G_{\text{correction}} = 0.237471$

**TS<sub>3</sub>**Charge = 0 Multiplicity = 1 **TS<sub>3</sub> = -1025.97i cm<sup>-1</sup>**

|   |          |          |          |
|---|----------|----------|----------|
| H | -0.64434 | -2.22273 | 0.00975  |
| C | -0.99943 | -1.48423 | 0.74735  |
| C | -0.38978 | -0.11377 | 0.40012  |
| C | -2.51542 | -1.53086 | 0.74745  |
| H | -0.61593 | -1.80953 | 1.72271  |
| C | -1.2307  | 0.62237  | -0.62397 |
| C | -0.27968 | 0.76886  | 1.66382  |
| C | 1.01844  | -0.37534 | -0.22215 |
| C | -3.07859 | -1.04274 | -0.5689  |
| H | -2.89484 | -2.53576 | 0.95393  |
| C | -0.78907 | 2.01066  | -0.9621  |
| C | -2.38826 | 0.12656  | -1.11218 |
| C | 0.08476  | 2.22435  | 1.39241  |
| H | 0.44915  | 0.30752  | 2.33964  |
| H | -1.25164 | 0.72899  | 2.17974  |
| O | 1.76881  | -1.2906  | 0.92391  |
| O | -4.07849 | -1.52082 | -1.07558 |
| C | -0.8018  | 2.84784  | 0.32469  |
| H | 0.22838  | 2.00393  | -1.36483 |
| H | -1.45579 | 2.44498  | -1.71516 |
| H | -2.93161 | 0.67751  | -1.88062 |
| H | 0.00996  | 2.79614  | 2.32615  |
| H | 1.12815  | 2.27494  | 1.07102  |
| H | -1.83712 | 2.92175  | 0.68973  |
| H | -0.48107 | 3.87308  | 0.10442  |
| H | 1.32812  | -2.14763 | 0.96192  |
| O | 1.77914  | 0.62384  | -0.46767 |
| H | 2.96007  | 0.37836  | -1.26    |
| H | 0.91301  | -1.14164 | -1.03016 |
| H | -2.91777 | -0.87974 | 1.53741  |
| O | 3.91046  | 0.07373  | -1.6074  |
| H | 4.48078  | 0.8459   | -1.61459 |
| H | 4.16815  | -0.73594 | -0.63614 |
| O | 4.13546  | -1.43284 | 0.26123  |
| H | 3.0925   | -1.40158 | 0.61201  |
| H | 4.36597  | -2.32719 | -0.00205 |

 $\Delta E_{\text{solv}} = -807.083488215$  $\Delta G_{\text{correction}} = 0.258768$



**PC<sub>1</sub>**

Charge = 0 Multiplicity = 1

|   |          |          |          |
|---|----------|----------|----------|
| H | -1.02337 | -2.11559 | -0.33703 |
| C | -0.82894 | -1.46304 | 0.5296   |
| C | 0.26477  | -0.44497 | 0.14669  |
| C | -2.15196 | -0.84707 | 0.93909  |
| H | -0.44359 | -2.11614 | 1.32158  |
| C | -0.32198 | 0.75     | -0.5781  |
| C | 0.99779  | 0.05904  | 1.41107  |
| C | 1.2214   | -1.24744 | -0.77463 |
| C | -2.6784  | 0.07101  | -0.14194 |
| H | -2.90376 | -1.60775 | 1.16703  |
| C | 0.62686  | 1.86016  | -0.9055  |
| C | -1.64879 | 0.90106  | -0.77191 |
| C | 1.90359  | 1.26821  | 1.19365  |
| H | 1.56426  | -0.77798 | 1.83626  |
| H | 0.22742  | 0.31587  | 2.15317  |
| O | 1.70415  | -2.41323 | -0.12869 |
| O | -3.86408 | 0.18126  | -0.39559 |
| C | 1.21427  | 2.3799   | 0.41524  |
| H | 1.44212  | 1.51559  | -1.54819 |
| H | 0.09857  | 2.66131  | -1.43321 |
| H | -2.01914 | 1.76327  | -1.32731 |
| H | 2.23641  | 1.64522  | 2.16856  |
| H | 2.80435  | 0.95602  | 0.65946  |
| H | 0.39967  | 2.81035  | 1.01589  |
| H | 1.91308  | 3.20031  | 0.21452  |
| H | 1.02515  | -3.09385 | -0.18189 |
| O | 2.34748  | -0.51167 | -1.11896 |
| H | 2.96721  | -1.13401 | -1.51696 |
| H | 0.65153  | -1.54795 | -1.67819 |
| H | -2.03204 | -0.24676 | 1.85263  |

 $\Delta E_{\text{solv}} = -654.245872112$  $\Delta G_{\text{correction}} = 0.221166$

**PC<sub>2</sub>**

Charge = 0 Multiplicity = 1

|   |          |          |          |
|---|----------|----------|----------|
| H | -0.51951 | -2.23857 | 0.18071  |
| C | -0.74985 | -1.40701 | 0.86686  |
| C | -0.02603 | -0.13799 | 0.37004  |
| C | -2.2593  | -1.29044 | 0.94458  |
| H | -0.34172 | -1.69138 | 1.84507  |
| C | -0.83851 | 0.58198  | -0.68978 |
| C | 0.21717  | 0.83547  | 1.54711  |
| C | 1.31486  | -0.64775 | -0.22013 |
| C | -2.83752 | -0.87367 | -0.3898  |
| H | -2.72486 | -2.22584 | 1.267    |
| C | -0.2993  | 1.89443  | -1.16515 |
| C | -2.06289 | 0.16362  | -1.07382 |
| C | 0.67013  | 2.23539  | 1.14282  |
| H | 0.94338  | 0.37633  | 2.22826  |
| H | -0.72643 | 0.90962  | 2.10814  |
| O | 2.03391  | -1.4254  | 0.76387  |
| O | -3.90233 | -1.29126 | -0.80709 |
| C | -0.20168 | 2.83217  | 0.0474   |
| H | 0.69436  | 1.78101  | -1.60707 |
| H | -0.96337 | 2.31732  | -1.92653 |
| H | -2.59143 | 0.69627  | -1.86492 |
| H | 0.6566   | 2.88419  | 2.02725  |
| H | 1.70739  | 2.1963   | 0.80175  |
| H | -1.2156  | 3.01702  | 0.43189  |
| H | 0.18878  | 3.80667  | -0.26788 |
| H | 1.53295  | -2.23205 | 0.93183  |
| O | 2.14478  | 0.37434  | -0.59639 |
| H | 2.96296  | -0.02833 | -0.95194 |
| H | 1.08402  | -1.32384 | -1.07054 |
| H | -2.54854 | -0.5287  | 1.68287  |
| O | 4.25036  | -1.30328 | -0.91324 |
| H | 3.78038  | -1.63994 | -0.13408 |
| H | 4.30434  | -2.02854 | -1.53964 |

 $\Delta E_{\text{solv}} = -730.68340503$  $\Delta G_{\text{correction}} = 0.243373$

**PC<sub>3</sub>**

Charge = 0 Multiplicity = 1

|   |          |          |          |
|---|----------|----------|----------|
| H | -0.74162 | -2.24456 | -0.00085 |
| C | -1.02141 | -1.49288 | 0.75507  |
| C | -0.3968  | -0.13906 | 0.36016  |
| C | -2.53407 | -1.48924 | 0.85343  |
| H | -0.57467 | -1.82861 | 1.6984   |
| C | -1.26506 | 0.59727  | -0.64246 |
| C | -0.23059 | 0.76033  | 1.60721  |
| C | 0.97881  | -0.49863 | -0.2594  |
| C | -3.15896 | -1.00807 | -0.43747 |
| H | -2.9302  | -2.47769 | 1.10241  |
| C | -0.82143 | 1.9749   | -1.02289 |
| C | -2.46311 | 0.12633  | -1.04826 |
| C | 0.12818  | 2.2131   | 1.30779  |
| H | 0.51808  | 0.30347  | 2.26521  |
| H | -1.1816  | 0.73117  | 2.15988  |
| O | 1.73626  | -1.29687 | 0.68865  |
| O | -4.20237 | -1.4591  | -0.87436 |
| C | -0.78228 | 2.8277   | 0.25407  |
| H | 0.17543  | 1.96191  | -1.47182 |
| H | -1.51751 | 2.40456  | -1.7513  |
| H | -3.03553 | 0.67826  | -1.79442 |
| H | 0.0706   | 2.79449  | 2.23638  |
| H | 1.1659   | 2.26916  | 0.97001  |
| H | -1.80545 | 2.91695  | 0.64806  |
| H | -0.45798 | 3.84628  | 0.01084  |
| H | 1.43536  | -2.20939 | 0.62624  |
| O | 1.73829  | 0.59672  | -0.55168 |
| H | 2.48862  | 0.2998   | -1.12056 |
| H | 0.80951  | -1.13088 | -1.15237 |
| H | -2.86661 | -0.812   | 1.65348  |
| O | 3.82439  | -0.47816 | -1.85621 |
| H | 4.3917   | 0.09879  | -2.37141 |
| H | 4.29988  | -0.67416 | -1.02061 |
| O | 4.49135  | -0.82179 | 0.71039  |
| H | 3.53945  | -0.90121 | 0.90194  |
| H | 4.91354  | -1.58317 | 1.11277  |

 $\Delta E_{\text{solv}} = -807.125974366$  $\Delta G_{\text{correction}} = 0.265497$

## 2. Coordinates of all stationary points in Fig. 3

### <sup>2</sup>Cpd I

Charge = 0 Multiplicity = 2

|    |          |          |          |
|----|----------|----------|----------|
| C  | -1.62086 | -2.58198 | -0.09655 |
| N  | -0.40135 | -1.96569 | -0.10574 |
| C  | 0.5285   | -2.96923 | -0.13579 |
| C  | -0.12416 | -4.24781 | -0.13429 |
| C  | -1.45925 | -4.00778 | -0.10599 |
| Fe | -0.04823 | 0.02513  | -0.22213 |
| O  | 0.08043  | -0.02789 | -1.84052 |
| C  | 1.9028   | -2.79117 | -0.158   |
| C  | 2.56694  | -1.57741 | -0.13895 |
| N  | 1.95979  | -0.34974 | -0.09856 |
| C  | 2.97074  | 0.57364  | -0.12467 |
| C  | 4.24441  | -0.08752 | -0.15042 |
| C  | 3.99343  | -1.42108 | -0.16125 |
| C  | 2.7824   | 1.94497  | -0.12855 |
| C  | 1.55897  | 2.59948  | -0.11485 |
| N  | 0.33254  | 1.99166  | -0.09842 |
| C  | -0.58704 | 3.00363  | -0.08479 |
| C  | 0.07199  | 4.27721  | -0.08047 |
| C  | 1.40575  | 4.02589  | -0.10099 |
| C  | -1.96119 | 2.82444  | -0.07603 |
| C  | -2.61587 | 1.60406  | -0.08775 |
| N  | -2.00207 | 0.38051  | -0.11619 |
| C  | -3.01073 | -0.5446  | -0.09164 |
| C  | -4.28581 | 0.11107  | -0.05446 |
| C  | -4.04059 | 1.44561  | -0.05234 |
| C  | -2.83751 | -1.91984 | -0.08394 |
| S  | 0.23445  | -0.21212 | 2.20342  |
| H  | 1.04546  | 0.84473  | 2.41587  |
| H  | -4.75094 | 2.26314  | -0.0224  |
| H  | -5.24056 | -0.40039 | -0.02685 |
| H  | -3.73653 | -2.53128 | -0.06852 |
| H  | -2.27391 | -4.72197 | -0.09354 |
| H  | 0.38985  | -5.2015  | -0.14806 |
| H  | 2.51531  | -3.68902 | -0.19021 |
| H  | 4.70265  | -2.23994 | -0.18264 |
| H  | 5.20247  | 0.41843  | -0.16268 |
| H  | 3.67369  | 2.56773  | -0.14725 |
| H  | 2.22623  | 4.73359  | -0.10463 |
| H  | -0.43493 | 5.2346   | -0.06394 |
| H  | -2.57912 | 3.71891  | -0.05754 |

$\Delta E_{\text{solv}} = -1585.81551347$

$\Delta G_{\text{correction}} = 0.235793$

**<sup>4</sup>Cpd I**

Charge = 0 Multiplicity = 4

|    |          |          |          |
|----|----------|----------|----------|
| C  | 2.76412  | 1.24559  | -0.26378 |
| N  | 1.41429  | 1.40952  | -0.11067 |
| C  | 1.20779  | 2.75499  | 0.02802  |
| C  | 2.46084  | 3.45289  | -0.01797 |
| C  | 3.42506  | 2.51812  | -0.21455 |
| Fe | 0.0142   | -0.01769 | -0.24121 |
| O  | 0.02949  | -0.01984 | -1.87954 |
| C  | -0.03455 | 3.364    | 0.11264  |
| C  | -1.25834 | 2.7232   | 0.02991  |
| N  | -1.43019 | 1.36869  | -0.11541 |
| C  | -2.77514 | 1.17381  | -0.29097 |
| C  | -3.46666 | 2.42916  | -0.23923 |
| C  | -2.52841 | 3.38659  | -0.0249  |
| C  | -3.37849 | -0.06644 | -0.41636 |
| C  | -2.73348 | -1.28999 | -0.30135 |
| N  | -1.38834 | -1.44777 | -0.11713 |
| C  | -1.18859 | -2.78654 | 0.07678  |
| C  | -2.43959 | -3.48725 | 0.02751  |
| C  | -3.39737 | -2.56    | -0.22971 |
| C  | 0.05092  | -3.39191 | 0.21602  |
| C  | 1.27674  | -2.75614 | 0.09203  |
| N  | 1.4441   | -1.41501 | -0.10333 |
| C  | 2.78617  | -1.2199  | -0.25833 |
| C  | 3.48355  | -2.47171 | -0.17216 |
| C  | 2.54675  | -3.42428 | 0.06714  |
| C  | 3.40124  | 0.01993  | -0.36508 |
| S  | -0.05389 | 0.23658  | 2.2526   |
| H  | -1.3616  | -0.03509 | 2.44136  |
| H  | 2.68692  | -4.48981 | 0.20407  |
| H  | 4.55706  | -2.58809 | -0.2609  |
| H  | 4.48348  | 0.02952  | -0.47045 |
| H  | 4.49531  | 2.66166  | -0.30275 |
| H  | 2.57215  | 4.52625  | 0.07826  |
| H  | -0.04924 | 4.44764  | 0.2001   |
| H  | -2.66845 | 4.45631  | 0.07444  |
| H  | -4.53876 | 2.54742  | -0.34174 |
| H  | -4.45809 | -0.08379 | -0.54506 |
| H  | -4.46525 | -2.70577 | -0.34045 |
| H  | -2.55386 | -4.55648 | 0.15981  |
| H  | 0.06296  | -4.46953 | 0.36134  |

 $\Delta E_{\text{solv}} = -1585.81457027$  $\Delta G_{\text{correction}} = 0.235193$

**<sup>2</sup>a1**

Charge = 0 Multiplicity = 2

|    |          |          |          |
|----|----------|----------|----------|
| C  | 2.44647  | -2.79732 | -0.38018 |
| N  | 2.68521  | -1.45488 | -0.52015 |
| C  | 3.68049  | -1.34222 | -1.45524 |
| C  | 4.10107  | -2.6445  | -1.88807 |
| C  | 3.33122  | -3.54551 | -1.22736 |
| Fe | 1.59786  | 0.06329  | 0.30092  |
| O  | 0.55329  | -0.05288 | -0.95111 |
| C  | 4.18373  | -0.14293 | -1.92806 |
| C  | 3.74868  | 1.12394  | -1.56351 |
| N  | 2.76049  | 1.39207  | -0.65636 |
| C  | 2.62932  | 2.75272  | -0.63457 |
| C  | 3.56806  | 3.35857  | -1.53399 |
| C  | 4.26673  | 2.34624  | -2.10817 |
| C  | 1.72699  | 3.44881  | 0.15428  |
| C  | 0.83373  | 2.8846   | 1.05096  |
| N  | 0.67725  | 1.54097  | 1.27097  |
| C  | -0.25606 | 1.42815  | 2.26487  |
| C  | -0.70147 | 2.72618  | 2.6783   |
| C  | -0.03206 | 3.63195  | 1.917    |
| C  | -0.72332 | 0.23512  | 2.79652  |
| C  | -0.32104 | -1.0301  | 2.40816  |
| N  | 0.61222  | -1.2879  | 1.43867  |
| C  | 0.66838  | -2.65087 | 1.32543  |
| C  | -0.24447 | -3.26289 | 2.24865  |
| C  | -0.85214 | -2.25697 | 2.92715  |
| C  | 1.50304  | -3.35065 | 0.46717  |
| S  | 3.32372  | -0.25507 | 2.0158   |
| H  | 4.40057  | 0.10365  | 1.28613  |
| H  | -1.60365 | -2.32288 | 3.70469  |
| H  | -0.38546 | -4.33155 | 2.35792  |
| H  | 1.42375  | -4.435   | 0.47839  |
| H  | 3.35216  | -4.62667 | -1.29406 |
| H  | 4.88318  | -2.83058 | -2.61436 |
| H  | 4.97639  | -0.19666 | -2.67052 |
| H  | 5.06214  | 2.40586  | -2.84139 |
| H  | 3.6711   | 4.42524  | -1.69308 |
| H  | 1.73457  | 4.53349  | 0.07895  |
| H  | -0.09537 | 4.71338  | 1.94328  |
| H  | -1.44599 | 2.90562  | 3.44429  |
| H  | -1.48522 | 0.30218  | 3.5687   |
| H  | -4.82161 | 2.05071  | -0.55616 |
| C  | -4.86442 | 1.33913  | -1.38841 |
| C  | -3.54118 | 0.56081  | -1.40536 |
| C  | -6.09545 | 0.46664  | -1.22107 |
| H  | -4.93807 | 1.94168  | -2.30396 |
| C  | -3.55027 | -0.5802  | -0.40901 |

|   |          |          |          |
|---|----------|----------|----------|
| C | -5.99257 | -0.41931 | 0.00267  |
| H | -7.01362 | 1.0578   | -1.1551  |
| C | -2.28425 | -1.36569 | -0.3438  |
| C | -4.65781 | -0.96111 | 0.25743  |
| O | -6.96578 | -0.7295  | 0.66923  |
| C | -2.0081  | -1.98484 | -1.72145 |
| H | -1.4353  | -0.72393 | -0.08404 |
| H | -2.3511  | -2.14477 | 0.42356  |
| H | -4.60823 | -1.77926 | 0.97724  |
| H | -2.7779  | -2.74209 | -1.93138 |
| H | -1.04559 | -2.51006 | -1.69808 |
| H | -6.22435 | -0.19933 | -2.08792 |
| C | -2.42072 | 1.55179  | -1.06652 |
| H | -2.4726  | 2.38448  | -1.79149 |
| H | -1.42533 | 1.09573  | -1.16366 |
| O | -2.62769 | 2.01314  | 0.25711  |
| H | -1.91067 | 2.61487  | 0.48397  |
| C | -2.00263 | -0.92983 | -2.8202  |
| H | -1.91255 | -1.41011 | -3.80237 |
| H | -1.10412 | -0.31301 | -2.70631 |
| C | -3.25487 | -0.05728 | -2.79327 |
| H | -3.17739 | 0.74956  | -3.53563 |
| H | -4.12862 | -0.65539 | -3.09018 |

$$\Delta E_{\text{solv}} = -2164.85791806$$

$$\Delta G_{\text{correction}} = 0.47331$$

**<sup>2</sup>a1-ts**

Charge = 0 Multiplicity = 2

|    |          |          |          |
|----|----------|----------|----------|
| C  | 2.15805  | -2.81921 | -0.33755 |
| N  | 2.37542  | -1.50321 | -0.62428 |
| C  | 3.19746  | -1.47617 | -1.71231 |
| C  | 3.51368  | -2.81756 | -2.12449 |
| C  | 2.86289  | -3.65079 | -1.27581 |
| Fe | 1.54938  | 0.09097  | 0.33526  |
| O  | 0.26611  | -0.11859 | -0.80289 |
| C  | 3.65654  | -0.32731 | -2.33373 |
| C  | 3.31774  | 0.96992  | -1.98162 |
| N  | 2.50343  | 1.32812  | -0.94125 |
| C  | 2.36802  | 2.68687  | -1.01179 |
| C  | 3.14011  | 3.20343  | -2.10498 |
| C  | 3.73486  | 2.13883  | -2.70188 |
| C  | 1.59126  | 3.45719  | -0.16155 |
| C  | 0.858    | 2.97843  | 0.91237  |
| N  | 0.7507   | 1.6603   | 1.28134  |
| C  | 0.01117  | 1.64341  | 2.43568  |
| C  | -0.38555 | 2.97481  | 2.78303  |
| C  | 0.12843  | 3.8028   | 1.83245  |
| C  | -0.34365 | 0.50779  | 3.144    |
| C  | -0.01412 | -0.78836 | 2.78794  |
| N  | 0.7326   | -1.13769 | 1.69369  |
| C  | 0.75785  | -2.50756 | 1.66825  |
| C  | 0.01232  | -3.02984 | 2.77586  |
| C  | -0.45818 | -1.96463 | 3.47523  |
| C  | 1.40175  | -3.2893  | 0.7221   |
| S  | 3.42465  | 0.07367  | 1.69889  |
| H  | 4.30831  | 0.64146  | 0.8529   |
| H  | -1.06366 | -1.96054 | 4.37377  |
| H  | -0.12038 | -4.08502 | 2.98409  |
| H  | 1.32116  | -4.36748 | 0.83639  |
| H  | 2.85834  | -4.73425 | -1.26394 |
| H  | 4.15395  | -3.07076 | -2.9612  |
| H  | 4.31463  | -0.45197 | -3.18995 |
| H  | 4.39069  | 2.12816  | -3.5644  |
| H  | 3.20818  | 4.25171  | -2.37074 |
| H  | 1.57815  | 4.53057  | -0.33302 |
| H  | 0.0528   | 4.88191  | 1.76658  |
| H  | -0.9848  | 3.23255  | 3.64809  |
| H  | -0.94765 | 0.64447  | 4.03686  |
| H  | -4.15002 | 2.14437  | -1.05348 |
| C  | -4.17018 | 1.30265  | -1.75532 |
| C  | -3.09656 | 0.27961  | -1.31272 |
| C  | -5.57776 | 0.73411  | -1.77967 |
| H  | -3.89419 | 1.70957  | -2.73683 |
| C  | -3.59381 | -0.59277 | -0.17817 |



|   |          |          |          |
|---|----------|----------|----------|
| C | -5.95809 | 0.12355  | -0.44698 |
| H | -6.31485 | 1.49747  | -2.04582 |
| C | -2.60454 | -1.60066 | 0.30432  |
| C | -4.87703 | -0.59746 | 0.22862  |
| O | -7.09751 | 0.15217  | -0.01788 |
| C | -2.35436 | -2.57955 | -0.85463 |
| H | -1.65318 | -1.13245 | 0.58595  |
| H | -2.98164 | -2.12759 | 1.18691  |
| H | -5.18267 | -1.24029 | 1.05442  |
| H | -3.29329 | -3.10921 | -1.07158 |
| H | -1.63108 | -3.34319 | -0.54497 |
| H | -5.66938 | -0.05584 | -2.53925 |
| C | -1.91696 | 1.12959  | -0.85355 |
| H | -1.54706 | 1.81626  | -1.63389 |
| H | -0.82796 | 0.43612  | -0.72855 |
| O | -2.20522 | 1.74112  | 0.33392  |
| H | -1.5497  | 2.42703  | 0.52939  |
| C | -1.8497  | -1.855   | -2.09651 |
| H | -1.80816 | -2.54934 | -2.94449 |
| H | -0.8214  | -1.52686 | -1.91827 |
| C | -2.71066 | -0.65281 | -2.48439 |
| H | -2.20936 | -0.06215 | -3.26402 |
| H | -3.64993 | -1.00295 | -2.93485 |

$$\Delta E_{\text{solv}} = -2164.83686861$$

$$\Delta G_{\text{correction}} = 0.469486$$

**<sup>2</sup>a2**

Charge = 0 Multiplicity = 2

|    |          |          |          |
|----|----------|----------|----------|
| C  | 2.49835  | -2.76421 | -0.51356 |
| N  | 2.678    | -1.41807 | -0.65114 |
| C  | 3.65989  | -1.25638 | -1.58572 |
| C  | 4.10813  | -2.53797 | -2.05861 |
| C  | 3.38027  | -3.47335 | -1.4005  |
| Fe | 1.69164  | 0.02855  | 0.33536  |
| O  | 0.43049  | -0.04979 | -0.95557 |
| C  | 4.14646  | -0.03913 | -2.02977 |
| C  | 3.67743  | 1.20355  | -1.63393 |
| N  | 2.70014  | 1.42266  | -0.70244 |
| C  | 2.46915  | 2.77228  | -0.69837 |
| C  | 3.34583  | 3.4223   | -1.62956 |
| C  | 4.10189  | 2.45064  | -2.20214 |
| C  | 1.53612  | 3.4254   | 0.08972  |
| C  | 0.71252  | 2.82269  | 1.02975  |
| N  | 0.64381  | 1.47625  | 1.27755  |
| C  | -0.19052 | 1.32369  | 2.35443  |
| C  | -0.68431 | 2.5999   | 2.77579  |
| C  | -0.13702 | 3.53131  | 1.94454  |
| C  | -0.53871 | 0.11261  | 2.93014  |
| C  | -0.10427 | -1.12931 | 2.49968  |
| N  | 0.7712   | -1.35009 | 1.46744  |
| C  | 0.85315  | -2.70854 | 1.31825  |
| C  | 0.01527  | -3.35834 | 2.28303  |
| C  | -0.56895 | -2.37997 | 3.0228   |
| C  | 1.64047  | -3.36952 | 0.38857  |
| S  | 3.30254  | 0.07968  | 1.97302  |
| H  | 4.03995  | 1.10997  | 1.5102   |
| H  | -1.26792 | -2.48088 | 3.84466  |
| H  | -0.0971  | -4.43213 | 2.37619  |
| H  | 1.60414  | -4.45594 | 0.39093  |
| H  | 3.43259  | -4.55243 | -1.48413 |
| H  | 4.88205  | -2.68407 | -2.80277 |
| H  | 4.9323   | -0.05827 | -2.78047 |
| H  | 4.87134  | 2.55203  | -2.9583  |
| H  | 3.36784  | 4.49021  | -1.81226 |
| H  | 1.4771   | 4.50704  | -0.00246 |
| H  | -0.25994 | 4.60812  | 1.96608  |
| H  | -1.37    | 2.75363  | 3.6005   |
| H  | -1.23101 | 0.13817  | 3.76732  |
| H  | -4.72535 | 2.09868  | -0.53717 |
| C  | -4.74756 | 1.41927  | -1.3969  |
| C  | -3.50071 | 0.50542  | -1.31648 |
| C  | -6.05929 | 0.65432  | -1.37551 |
| H  | -4.67299 | 2.04988  | -2.29201 |
| C  | -3.70405 | -0.61982 | -0.31317 |

|   |          |          |          |
|---|----------|----------|----------|
| C | -6.15985 | -0.25692 | -0.17028 |
| H | -6.92026 | 1.32942  | -1.38252 |
| C | -2.51347 | -1.5013  | -0.13093 |
| C | -4.90548 | -0.90524 | 0.22215  |
| O | -7.22009 | -0.49962 | 0.37747  |
| C | -2.18792 | -2.16339 | -1.47987 |
| H | -1.63823 | -0.92698 | 0.19712  |
| H | -2.70138 | -2.25832 | 0.63751  |
| H | -5.00134 | -1.7242  | 0.9355   |
| H | -2.99682 | -2.86626 | -1.72637 |
| H | -1.27172 | -2.75651 | -1.38071 |
| H | -6.16051 | 0.02424  | -2.27119 |
| C | -2.35172 | 1.37304  | -0.89832 |
| H | -1.7579  | 1.91749  | -1.63889 |
| H | -0.38561 | 0.43365  | -0.7258  |
| O | -2.48112 | 1.91336  | 0.32339  |
| H | -1.75534 | 2.52422  | 0.52845  |
| C | -2.02519 | -1.14197 | -2.5996  |
| H | -1.9227  | -1.6584  | -3.56156 |
| H | -1.08061 | -0.6067  | -2.45085 |
| C | -3.18627 | -0.15707 | -2.67546 |
| H | -2.98265 | 0.62556  | -3.41969 |
| H | -4.09569 | -0.66926 | -3.01801 |

$$\Delta E_{\text{solv}} = -2164.85133897$$

$$\Delta G_{\text{correction}} = 0.472128$$

**<sup>2</sup>a3**

Charge = 0 Multiplicity = 2

|    |          |          |          |
|----|----------|----------|----------|
| C  | -2.08053 | -2.65263 | -0.80227 |
| N  | -1.63759 | -1.85136 | 0.22354  |
| C  | -1.40499 | -2.69838 | 1.28284  |
| C  | -1.66985 | -4.05122 | 0.90299  |
| C  | -2.08267 | -4.02346 | -0.39362 |
| Fe | -1.58895 | 0.16933  | 0.24089  |
| O  | 0.40118  | -0.20385 | -0.5674  |
| C  | -0.94357 | -2.30167 | 2.52814  |
| C  | -0.65849 | -0.99889 | 2.90104  |
| N  | -0.80747 | 0.10545  | 2.09428  |
| C  | -0.38042 | 1.16945  | 2.85354  |
| C  | 0.05154  | 0.72493  | 4.1477   |
| C  | -0.12476 | -0.62052 | 4.17875  |
| C  | -0.3494  | 2.48486  | 2.4213   |
| C  | -0.74878 | 2.926    | 1.17004  |
| N  | -1.23361 | 2.12563  | 0.16511  |
| C  | -1.54253 | 2.97449  | -0.86662 |
| C  | -1.21812 | 4.32407  | -0.51571 |
| C  | -0.7222  | 4.29424  | 0.74804  |
| C  | -2.09345 | 2.59529  | -2.07908 |
| C  | -2.4074  | 1.2993   | -2.44729 |
| N  | -2.23464 | 0.19768  | -1.65291 |
| C  | -2.5817  | -0.87452 | -2.43205 |
| C  | -3.00762 | -0.4346  | -3.73378 |
| C  | -2.90264 | 0.91604  | -3.74193 |
| C  | -2.5046  | -2.19981 | -2.04198 |
| S  | -3.63901 | 0.38419  | 0.96588  |
| H  | -3.42856 | 0.43829  | 2.30154  |
| H  | -3.12374 | 1.60678  | -4.54718 |
| H  | -3.3354  | -1.09227 | -4.53036 |
| H  | -2.82128 | -2.95076 | -2.76189 |
| H  | -2.38398 | -4.85359 | -1.02191 |
| H  | -1.55721 | -4.9089  | 1.55602  |
| H  | -0.78947 | -3.0789  | 3.273    |
| H  | 0.08648  | -1.31067 | 4.98739  |
| H  | 0.43617  | 1.37379  | 4.92594  |
| H  | 0.01316  | 3.2335   | 3.12154  |
| H  | -0.37172 | 5.11984  | 1.35609  |
| H  | -1.3586  | 5.18004  | -1.16516 |
| H  | -2.2817  | 3.38139  | -2.80634 |
| H  | 3.47742  | 1.89209  | 0.35365  |
| C  | 3.73235  | 0.89842  | 0.73929  |
| C  | 2.83792  | -0.13554 | 0.02507  |
| C  | 5.22032  | 0.67737  | 0.54644  |
| H  | 3.47022  | 0.91252  | 1.80562  |
| C  | 3.42413  | -0.57529 | -1.29969 |

|   |         |          |          |
|---|---------|----------|----------|
| C | 5.57285 | 0.62332  | -0.92343 |
| H | 5.81442 | 1.45679  | 1.03104  |
| C | 2.68686 | -1.66727 | -2.01438 |
| C | 4.61836 | -0.13763 | -1.74334 |
| O | 6.60419 | 1.07896  | -1.37884 |
| C | 2.74236 | -2.9152  | -1.12085 |
| H | 1.6392  | -1.40201 | -2.2069  |
| H | 3.1523  | -1.87092 | -2.98411 |
| H | 4.98631 | -0.45199 | -2.72079 |
| H | 3.794   | -3.21017 | -1.00256 |
| H | 2.23862 | -3.75557 | -1.61153 |
| H | 5.53894 | -0.27628 | 0.99391  |
| C | 1.50092 | 0.63361  | -0.17894 |
| H | 1.24326 | 1.11377  | 0.77344  |
| H | 0.51453 | -1.09026 | -0.19905 |
| O | 1.58273 | 1.65929  | -1.09829 |
| H | 1.83233 | 1.28448  | -1.95395 |
| C | 2.12155 | -2.65431 | 0.2447   |
| H | 2.29657 | -3.5076  | 0.91055  |
| H | 1.02642 | -2.64323 | 0.1441   |
| C | 2.6552  | -1.38651 | 0.92434  |
| H | 2.02879 | -1.1213  | 1.78874  |
| H | 3.64382 | -1.6192  | 1.34252  |

$$\Delta E_{\text{solv}} = -2164.95153946$$

$$\Delta G_{\text{correction}} = 0.479453$$

**4a1**

Charge = 0 Multiplicity = 4

|    |          |          |          |
|----|----------|----------|----------|
| C  | -2.32624 | 2.87566  | -0.36353 |
| N  | -2.65405 | 1.55646  | -0.48961 |
| C  | -3.76306 | 1.51537  | -1.28466 |
| C  | -4.15137 | 2.84441  | -1.66435 |
| C  | -3.2452  | 3.68874  | -1.10945 |
| Fe | -1.63344 | 0.00135  | 0.25138  |
| O  | -0.52056 | 0.04247  | -0.96126 |
| C  | -4.37762 | 0.35407  | -1.72828 |
| C  | -3.91575 | -0.93551 | -1.51177 |
| N  | -2.83022 | -1.25925 | -0.74662 |
| C  | -2.65931 | -2.60835 | -0.8843  |
| C  | -3.65871 | -3.14847 | -1.76115 |
| C  | -4.45279 | -2.11215 | -2.1334  |
| C  | -1.72822 | -3.36367 | -0.1854  |
| C  | -0.88427 | -2.88546 | 0.80432  |
| N  | -0.78052 | -1.56795 | 1.17078  |
| C  | 0.10497  | -1.53049 | 2.21832  |
| C  | 0.54248  | -2.85756 | 2.53709  |
| C  | -0.05548 | -3.69676 | 1.64874  |
| C  | 0.58935  | -0.37608 | 2.81068  |
| C  | 0.26622  | 0.91807  | 2.4403   |
| N  | -0.60564 | 1.2537   | 1.43633  |
| C  | -0.54579 | 2.61627  | 1.32422  |
| C  | 0.37551  | 3.15266  | 2.28483  |
| C  | 0.86904  | 2.10008  | 2.9853   |
| C  | -1.32333 | 3.3699   | 0.45905  |
| S  | -3.15758 | -0.12419 | 2.21237  |
| H  | -3.52811 | -1.41543 | 2.08709  |
| H  | 1.59161  | 2.10573  | 3.79238  |
| H  | 0.5978   | 4.20619  | 2.4052   |
| H  | -1.18017 | 4.44772  | 0.47432  |
| H  | -3.20402 | 4.76958  | -1.17092 |
| H  | -5.004   | 3.08449  | -2.28804 |
| H  | -5.25314 | 0.46712  | -2.36313 |
| H  | -5.3196  | -2.12623 | -2.7831  |
| H  | -3.74409 | -4.19429 | -2.03085 |
| H  | -1.71096 | -4.43368 | -0.37832 |
| H  | 0.0327   | -4.77443 | 1.57696  |
| H  | 1.24385  | -3.10034 | 3.32617  |
| H  | 1.3239   | -0.4977  | 3.60234  |
| H  | 4.86395  | -2.04919 | -0.49398 |
| C  | 4.90242  | -1.35316 | -1.33956 |
| C  | 3.5766   | -0.58015 | -1.36723 |
| C  | 6.1309   | -0.47364 | -1.19252 |
| H  | 4.97601  | -1.97226 | -2.24397 |
| C  | 3.58305  | 0.5749   | -0.3879  |

|   |         |          |          |
|---|---------|----------|----------|
| C | 6.02784 | 0.43666  | 0.01305  |
| H | 7.05146 | -1.0598  | -1.1166  |
| C | 2.31338 | 1.35505  | -0.32878 |
| C | 4.69178 | 0.97468  | 0.26577  |
| O | 7.00312 | 0.76651  | 0.66742  |
| H | 1.46773 | 0.71326  | -0.05618 |
| H | 2.38131 | 2.14546  | 0.42649  |
| H | 4.641   | 1.80339  | 0.97306  |
| H | 6.25589 | 0.1758   | -2.07237 |
| C | 2.45937 | -1.56908 | -1.01285 |
| H | 2.5181  | -2.41524 | -1.72175 |
| H | 1.46301 | -1.11881 | -1.12223 |
| O | 2.66449 | -2.00382 | 0.32033  |
| H | 1.95319 | -2.61052 | 0.55255  |
| C | 2.03137 | 0.88517  | -2.80055 |
| H | 1.13511 | 0.26689  | -2.67843 |
| H | 1.93955 | 1.35337  | -3.78838 |
| C | 2.03249 | 1.95378  | -1.71497 |
| H | 1.06723 | 2.4742   | -1.69791 |
| H | 2.79833 | 2.71229  | -1.9349  |
| C | 3.287   | 0.01791  | -2.7633  |
| H | 3.21159 | -0.79947 | -3.49425 |
| H | 4.15834 | 0.61496  | -3.06941 |

$$\Delta E_{\text{solv}} = -2164.8574466$$

$$\Delta G_{\text{correction}} = 0.472831$$

**<sup>4</sup>a1-ts**

Charge = 0 Multiplicity = 4

|    |          |          |          |
|----|----------|----------|----------|
| C  | -2.14599 | 2.85543  | -0.3424  |
| N  | -2.42063 | 1.5353   | -0.59192 |
| C  | -3.34323 | 1.52269  | -1.60407 |
| C  | -3.65226 | 2.86609  | -2.00468 |
| C  | -2.90058 | 3.69048  | -1.23324 |
| Fe | -1.61456 | -0.03877 | 0.31089  |
| O  | -0.24092 | 0.03661  | -0.78836 |
| C  | -3.8802  | 0.38676  | -2.18229 |
| C  | -3.51146 | -0.91515 | -1.87995 |
| N  | -2.60661 | -1.27292 | -0.92103 |
| C  | -2.44622 | -2.6304  | -1.0329  |
| C  | -3.29112 | -3.13821 | -2.07586 |
| C  | -3.96157 | -2.07673 | -2.59207 |
| C  | -1.61557 | -3.41038 | -0.24645 |
| C  | -0.85317 | -2.95445 | 0.8212   |
| N  | -0.76811 | -1.65121 | 1.22332  |
| C  | -0.00063 | -1.64089 | 2.35395  |
| C  | 0.42295  | -2.97384 | 2.66978  |
| C  | -0.09396 | -3.79018 | 1.70984  |
| C  | 0.36775  | -0.50548 | 3.06091  |
| C  | 0.04573  | 0.79609  | 2.72105  |
| N  | -0.71976 | 1.174    | 1.64605  |
| C  | -0.67944 | 2.53746  | 1.608    |
| C  | 0.11612  | 3.03841  | 2.69205  |
| C  | 0.55496  | 1.95888  | 3.38911  |
| C  | -1.32577 | 3.32583  | 0.66619  |
| S  | -3.29848 | -0.22929 | 1.88545  |
| H  | -3.81741 | -1.40545 | 1.47559  |
| H  | 1.18519  | 1.93486  | 4.27016  |
| H  | 0.30241  | 4.08819  | 2.88605  |
| H  | -1.20644 | 4.40302  | 0.75093  |
| H  | -2.86249 | 4.77331  | -1.24091 |
| H  | -4.35663 | 3.12836  | -2.78513 |
| H  | -4.61067 | 0.52747  | -2.97474 |
| H  | -4.68652 | -2.06323 | -3.39721 |
| H  | -3.35524 | -4.18112 | -2.36305 |
| H  | -1.5943  | -4.47751 | -0.4535  |
| H  | -0.00058 | -4.86616 | 1.61889  |
| H  | 1.0453   | -3.23956 | 3.51589  |
| H  | 0.99804  | -0.64834 | 3.93474  |
| H  | 4.24632  | -2.15586 | -1.05264 |
| C  | 4.26313  | -1.31441 | -1.75511 |
| C  | 3.16318  | -0.31507 | -1.32977 |
| C  | 5.66042  | -0.72068 | -1.7583  |
| H  | 4.01058  | -1.72787 | -2.74037 |
| C  | 3.62591  | 0.56456  | -0.18607 |



|   |         |          |          |
|---|---------|----------|----------|
| C | 6.00837 | -0.10241 | -0.42041 |
| H | 6.41683 | -1.46912 | -2.01269 |
| C | 2.6097  | 1.54994  | 0.28656  |
| C | 4.90283 | 0.59489  | 0.23989  |
| O | 7.14207 | -0.10669 | 0.02537  |
| H | 1.66745 | 1.0587   | 0.55906  |
| H | 2.96612 | 2.08548  | 1.17272  |
| H | 5.18318 | 1.24196  | 1.07147  |
| H | 5.74915 | 0.07123  | -2.51641 |
| C | 1.98195 | -1.17581 | -0.89715 |
| H | 1.64069 | -1.86184 | -1.6919  |
| H | 0.86271 | -0.50813 | -0.7568  |
| O | 2.26312 | -1.80567 | 0.29022  |
| H | 1.60169 | -2.48899 | 0.473    |
| C | 1.87192 | 1.78595  | -2.12011 |
| H | 0.85411 | 1.42212  | -1.94756 |
| H | 1.80984 | 2.48084  | -2.96653 |
| C | 2.34419 | 2.52338  | -0.87336 |
| H | 1.59678 | 3.26604  | -0.56927 |
| H | 3.27005 | 3.079    | -1.08176 |
| C | 2.7788  | 0.61694  | -2.5031  |
| H | 2.3131  | 0.01908  | -3.2992  |
| H | 3.71599 | 1.00172  | -2.92934 |

$$\Delta E_{\text{solv}} = -2164.83226528$$

$$\Delta G_{\text{correction}} = 0.469263$$

**4a2**

Charge = 0 Multiplicity = 4

|    |          |          |          |
|----|----------|----------|----------|
| C  | -2.34732 | 2.85392  | -0.35141 |
| N  | -2.61783 | 1.52622  | -0.54231 |
| C  | -3.64318 | 1.46907  | -1.44656 |
| C  | -4.02093 | 2.79539  | -1.84393 |
| C  | -3.21005 | 3.65283  | -1.17472 |
| Fe | -1.70359 | -0.01491 | 0.33315  |
| O  | -0.44582 | 0.0276   | -0.96595 |
| C  | -4.22272 | 0.30915  | -1.92836 |
| C  | -3.81246 | -0.97745 | -1.61738 |
| N  | -2.8133  | -1.29781 | -0.7408  |
| C  | -2.64839 | -2.65589 | -0.82362 |
| C  | -3.59137 | -3.20534 | -1.75427 |
| C  | -4.32068 | -2.16666 | -2.23718 |
| C  | -1.72451 | -3.40016 | -0.10985 |
| C  | -0.84686 | -2.89772 | 0.84003  |
| N  | -0.71169 | -1.57574 | 1.17016  |
| C  | 0.15377  | -1.52581 | 2.23022  |
| C  | 0.59546  | -2.84725 | 2.56187  |
| C  | -0.01119 | -3.69883 | 1.68877  |
| C  | 0.57347  | -0.36865 | 2.86613  |
| C  | 0.19881  | 0.91622  | 2.51636  |
| N  | -0.68006 | 1.24684  | 1.51497  |
| C  | -0.6755  | 2.6124   | 1.43589  |
| C  | 0.21533  | 3.15724  | 2.41806  |
| C  | 0.74714  | 2.10691  | 3.09545  |
| C  | -1.43366 | 3.36498  | 0.55314  |
| S  | -3.22676 | -0.11966 | 2.03572  |
| H  | -3.89792 | -1.22153 | 1.64138  |
| H  | 1.46649  | 2.1202   | 3.90557  |
| H  | 0.39867  | 4.21543  | 2.56221  |
| H  | -1.32885 | 4.44565  | 0.6013   |
| H  | -3.19555 | 4.73563  | -1.21075 |
| H  | -4.80917 | 3.02436  | -2.55117 |
| H  | -5.03303 | 0.41524  | -2.64473 |
| H  | -5.12184 | -2.1861  | -2.96634 |
| H  | -3.67259 | -4.25794 | -1.99833 |
| H  | -1.72019 | -4.47497 | -0.2722  |
| H  | 0.06498  | -4.77888 | 1.63852  |
| H  | 1.29336  | -3.08136 | 3.35678  |
| H  | 1.28353  | -0.47718 | 3.68132  |
| H  | 4.72773  | -2.10603 | -0.59395 |
| C  | 4.78152  | -1.39513 | -1.4268  |
| C  | 3.52413  | -0.50036 | -1.36409 |
| C  | 6.08648  | -0.62494 | -1.32359 |
| H  | 4.75013  | -1.99442 | -2.34607 |
| C  | 3.67922  | 0.59562  | -0.32248 |

|   |         |          |          |
|---|---------|----------|----------|
| C | 6.12881 | 0.24445  | -0.08447 |
| H | 6.95439 | -1.2913  | -1.31874 |
| C | 2.47738 | 1.46492  | -0.1563  |
| C | 4.85454 | 0.87216  | 0.27362  |
| O | 7.16292 | 0.47395  | 0.51779  |
| H | 1.59937 | 0.87514  | 0.13203  |
| H | 2.63816 | 2.2052   | 0.63475  |
| H | 4.91382 | 1.66846  | 1.01634  |
| H | 6.21855 | 0.03879  | -2.19093 |
| C | 2.35512 | -1.38275 | -1.0248  |
| H | 1.91075 | -1.9928  | -1.81965 |
| H | 0.34674 | -0.51244 | -0.79477 |
| O | 2.45264 | -1.95791 | 0.2059   |
| H | 1.74612 | -2.6041  | 0.34231  |
| C | 2.06794 | 1.16432  | -2.64576 |
| H | 1.13389 | 0.60327  | -2.53337 |
| H | 1.97982 | 1.70367  | -3.59675 |
| C | 2.18202 | 2.15817  | -1.49591 |
| H | 1.25543 | 2.73755  | -1.40867 |
| H | 2.98794 | 2.87764  | -1.70162 |
| C | 3.25133 | 0.20522  | -2.7116  |
| H | 3.09003 | -0.55467 | -3.48906 |
| H | 4.16115 | 0.74788  | -3.00375 |

$$\Delta E_{\text{solv}} = -2164.86794131$$

$$\Delta G_{\text{correction}} = 0.471229$$

**4a3**

Charge = 0 Multiplicity = 4

|    |          |          |          |
|----|----------|----------|----------|
| C  | -2.19708 | -2.64185 | -0.80424 |
| N  | -1.6964  | -1.86453 | 0.21032  |
| C  | -1.36329 | -2.73738 | 1.21744  |
| C  | -1.63441 | -4.08588 | 0.81723  |
| C  | -2.14785 | -4.02672 | -0.43961 |
| Fe | -1.7166  | 0.17115  | 0.30193  |
| O  | 0.50044  | -0.257   | -0.75997 |
| C  | -0.82077 | -2.36909 | 2.43691  |
| C  | -0.519   | -1.07138 | 2.81969  |
| N  | -0.71641 | 0.0537   | 2.0504   |
| C  | -0.23845 | 1.10475  | 2.80008  |
| C  | 0.27072  | 0.63079  | 4.0487   |
| C  | 0.09359  | -0.71877 | 4.06245  |
| C  | -0.21936 | 2.43067  | 2.39492  |
| C  | -0.68635 | 2.90077  | 1.17953  |
| N  | -1.26554 | 2.12987  | 0.20519  |
| C  | -1.59536 | 2.99564  | -0.80389 |
| C  | -1.20085 | 4.33212  | -0.46504 |
| C  | -0.63458 | 4.27338  | 0.76591  |
| C  | -2.22542 | 2.6432   | -1.98356 |
| C  | -2.58425 | 1.35514  | -2.34546 |
| N  | -2.37865 | 0.23376  | -1.58426 |
| C  | -2.79557 | -0.82307 | -2.35233 |
| C  | -3.29708 | -0.3531  | -3.60895 |
| C  | -3.16796 | 0.99964  | -3.60377 |
| C  | -2.70967 | -2.15932 | -1.99625 |
| S  | -3.88941 | 0.38717  | 1.24088  |
| H  | -3.5353  | 0.48172  | 2.53922  |
| H  | -3.43073 | 1.70523  | -4.38301 |
| H  | -3.68924 | -0.98988 | -4.39318 |
| H  | -3.0815  | -2.88911 | -2.71094 |
| H  | -2.4816  | -4.84273 | -1.06981 |
| H  | -1.45514 | -4.96013 | 1.4321   |
| H  | -0.60717 | -3.16111 | 3.15029  |
| H  | 0.35623  | -1.42452 | 4.84187  |
| H  | 0.70646  | 1.26059  | 4.81546  |
| H  | 0.20194  | 3.15705  | 3.08513  |
| H  | -0.21555 | 5.0796   | 1.35616  |
| H  | -1.34499 | 5.19726  | -1.10115 |
| H  | -2.4399  | 3.43847  | -2.69272 |
| H  | 3.47666  | 1.90325  | 0.30311  |
| C  | 3.74214  | 0.91618  | 0.6992   |
| C  | 2.91056  | -0.13812 | -0.05803 |
| C  | 5.2431   | 0.73783  | 0.57485  |
| H  | 3.43062  | 0.92055  | 1.75257  |
| C  | 3.56822  | -0.55602 | -1.35374 |

|   |         |          |          |
|---|---------|----------|----------|
| C | 5.66531 | 0.69512  | -0.87742 |
| H | 5.79318 | 1.53283  | 1.08571  |
| C | 2.88731 | -1.65866 | -2.10544 |
| C | 4.76957 | -0.08541 | -1.74218 |
| O | 6.70667 | 1.17665  | -1.28178 |
| C | 2.92669 | -2.90999 | -1.21612 |
| H | 1.843   | -1.41117 | -2.33303 |
| H | 3.39837 | -1.84763 | -3.05518 |
| H | 5.18843 | -0.38429 | -2.7039  |
| H | 3.97734 | -3.18289 | -1.0457  |
| H | 2.46793 | -3.75911 | -1.73495 |
| H | 5.56776 | -0.20706 | 1.03655  |
| C | 1.55593 | 0.58774  | -0.31825 |
| H | 1.26155 | 1.06113  | 0.62909  |
| H | 0.52509 | -1.08795 | -0.26858 |
| O | 1.65053 | 1.62783  | -1.2262  |
| H | 1.91682 | 1.25938  | -2.0792  |
| C | 2.23344 | -2.66854 | 0.11775  |
| H | 2.3888  | -3.52385 | 0.7864   |
| H | 1.14591 | -2.66659 | -0.04307 |
| C | 2.71824 | -1.39756 | 0.82603  |
| H | 2.05617 | -1.14855 | 1.66876  |
| H | 3.69371 | -1.6173  | 1.28126  |

$$\Delta E_{\text{solv}} = -2164.97446686$$

$$\Delta G_{\text{correction}} = 0.474432$$

### 3. Coordinates of all stationary points in Fig. 5

#### <sup>2</sup>ferric-peroxo

Charge = 0 Multiplicity = 2

|    |          |          |          |
|----|----------|----------|----------|
| C  | 1.87395  | -2.40519 | -0.13099 |
| N  | 1.74307  | -1.04121 | -0.10295 |
| C  | 3.02029  | -0.54343 | -0.11397 |
| C  | 3.97046  | -1.61486 | -0.1662  |
| C  | 3.25889  | -2.77066 | -0.18018 |
| Fe | 0.03565  | 0.01274  | 0.0953   |
| O  | 0.02258  | -0.02804 | -2.06011 |
| C  | 3.35374  | 0.79808  | -0.07879 |
| C  | 2.44755  | 1.84319  | -0.0502  |
| N  | 1.07925  | 1.71167  | -0.04464 |
| C  | 0.58028  | 2.99186  | -0.06427 |
| C  | 1.65152  | 3.93844  | -0.07608 |
| C  | 2.8095   | 3.22601  | -0.06391 |
| C  | -0.76198 | 3.3283   | -0.08281 |
| C  | -1.80898 | 2.42504  | -0.06438 |
| N  | -1.67666 | 1.0612   | -0.02907 |
| C  | -2.95359 | 0.56454  | 0.03567  |
| C  | -3.90466 | 1.63596  | 0.02017  |
| C  | -3.19446 | 2.79068  | -0.04556 |
| C  | -3.28548 | -0.77516 | 0.10948  |
| C  | -2.37851 | -1.82039 | 0.10037  |
| N  | -1.01137 | -1.68863 | 0.03819  |
| C  | -0.51345 | -2.96953 | -0.00246 |
| C  | -1.58371 | -3.91573 | 0.04748  |
| C  | -2.74003 | -3.20293 | 0.11495  |
| C  | 0.82645  | -3.30719 | -0.08691 |
| S  | 0.13687  | 0.07989  | 2.42135  |
| H  | -0.30627 | -1.17147 | 2.6587   |
| H  | -3.75795 | -3.57161 | 0.1585   |
| H  | -1.45483 | -4.99136 | 0.02545  |
| H  | 1.07385  | -4.36513 | -0.11123 |
| H  | 3.62561  | -3.78967 | -0.21463 |
| H  | 5.04569  | -1.48309 | -0.18787 |
| H  | 4.41016  | 1.05278  | -0.08448 |
| H  | 3.8283   | 3.59475  | -0.07156 |
| H  | 1.52151  | 5.01397  | -0.09411 |
| H  | -1.01194 | 4.38569  | -0.10151 |
| H  | -3.56208 | 3.80953  | -0.0735  |
| H  | -4.97956 | 1.50471  | 0.05601  |
| H  | -4.34069 | -1.02922 | 0.16192  |
| O  | -1.04199 | -0.24358 | -2.65242 |

$\Delta E_{\text{solv}} = -1660.95093591$

$\Delta G_{\text{correction}} = 0.234765$

#### **<sup>4</sup>ferric-peroxo**

Charge = 0 Multiplicity = 4

|    |          |          |          |
|----|----------|----------|----------|
| C  | -0.28946 | -3.01035 | -0.08064 |
| N  | 0.56048  | -1.92978 | -0.10315 |
| C  | 1.82574  | -2.45802 | -0.13178 |
| C  | 1.77024  | -3.88764 | -0.16119 |
| C  | 0.45607  | -4.23065 | -0.13089 |
| Fe | 0.06262  | -0.00139 | 0.08826  |
| O  | -0.19298 | -0.06401 | -2.0556  |
| C  | 2.99732  | -1.72033 | -0.11566 |
| C  | 3.06909  | -0.34197 | -0.06937 |
| N  | 1.98507  | 0.50427  | -0.03777 |
| C  | 2.5164   | 1.77272  | -0.04249 |
| C  | 3.94883  | 1.71866  | -0.06856 |
| C  | 4.2916   | 0.40687  | -0.0851  |
| C  | 1.77791  | 2.93991  | -0.05189 |
| C  | 0.39547  | 3.00745  | -0.05434 |
| N  | -0.44807 | 1.92477  | -0.04492 |
| C  | -1.7189  | 2.44943  | 0.00141  |
| C  | -1.66763 | 3.87934  | -0.01357 |
| C  | -0.35467 | 4.22589  | -0.04645 |
| C  | -2.88637 | 1.71297  | 0.07905  |
| C  | -2.96174 | 0.33102  | 0.13013  |
| N  | -1.88336 | -0.51297 | 0.10726  |
| C  | -2.41006 | -1.77881 | 0.10015  |
| C  | -3.84278 | -1.72804 | 0.15165  |
| C  | -4.18602 | -0.41551 | 0.16995  |
| C  | -1.66814 | -2.94351 | 0.01038  |
| S  | 0.1347   | -0.02644 | 2.27559  |
| H  | -1.13098 | -0.40133 | 2.56285  |
| H  | -5.17597 | 0.02443  | 0.19278  |
| H  | -4.49066 | -2.59657 | 0.1562   |
| H  | -2.21257 | -3.88453 | 0.01401  |
| H  | 0.01625  | -5.22094 | -0.13278 |
| H  | 2.63716  | -4.53684 | -0.19456 |
| H  | 3.93456  | -2.27045 | -0.14    |
| H  | 5.28151  | -0.03278 | -0.1153  |
| H  | 4.59682  | 2.58699  | -0.08209 |
| H  | 2.32452  | 3.87947  | -0.0573  |
| H  | 0.08208  | 5.21743  | -0.05938 |
| H  | -2.53666 | 4.52621  | 0.00768  |
| H  | -3.8223  | 2.26557  | 0.10305  |
| O  | -1.20242 | 0.24177  | -2.68865 |

$\Delta E_{\text{solv}} = -1660.97022846$

$\Delta G_{\text{correction}} = 0.23522$

## 19-OH

Charge = 0 Multiplicity = 1

|   |          |          |          |
|---|----------|----------|----------|
| H | 1.24576  | 2.01568  | 0.11315  |
| C | 0.92493  | 1.28968  | 0.86949  |
| C | -0.35938 | 0.62538  | 0.35558  |
| C | 2.0631   | 0.32028  | 1.13069  |
| H | 0.69288  | 1.86926  | 1.77325  |
| C | -0.05483 | -0.4685  | -0.64809 |
| C | 2.36329  | -0.537   | -0.08045 |
| H | 2.97876  | 0.83474  | 1.43598  |
| C | -1.25627 | -1.13363 | -1.23928 |
| C | 1.18815  | -0.93931 | -0.85879 |
| O | 3.48456  | -0.9364  | -0.33853 |
| C | -2.03932 | -1.80039 | -0.09787 |
| H | -1.8957  | -0.40671 | -1.75807 |
| H | -0.95724 | -1.87716 | -1.9851  |
| H | 1.35771  | -1.72664 | -1.59382 |
| H | -1.42163 | -2.60904 | 0.31702  |
| H | -2.94613 | -2.27754 | -0.4875  |
| H | 1.81318  | -0.36471 | 1.95513  |
| C | -1.21113 | 1.72288  | -0.29089 |
| H | -1.31637 | 2.54747  | 0.4359   |
| H | -2.22587 | 1.36305  | -0.51561 |
| O | -0.56071 | 2.14994  | -1.47079 |
| H | -1.05907 | 2.88317  | -1.84225 |
| C | -2.3893  | -0.81018 | 1.00654  |
| H | -2.85002 | -1.33721 | 1.8504   |
| H | -3.16108 | -0.11836 | 0.64449  |
| C | -1.17277 | -0.02735 | 1.49731  |
| H | -1.47878 | 0.74694  | 2.21473  |
| H | -0.50603 | -0.7024  | 2.05135  |

$\Delta E_{\text{solv}} = -579.023497485$

$\Delta G_{\text{correction}} = 0.217473$



**<sup>2</sup>b1**

Charge = 0 Multiplicity = 2

|    |          |          |          |
|----|----------|----------|----------|
| C  | -3.72028 | 0.41871  | -1.63148 |
| N  | -2.96499 | -0.40779 | -0.83578 |
| C  | -3.40838 | -1.6829  | -1.07777 |
| C  | -4.47272 | -1.65558 | -2.03356 |
| C  | -4.6789  | -0.35159 | -2.36151 |
| Fe | -1.55458 | 0.15361  | 0.45322  |
| O  | -0.20785 | -0.34201 | -1.07907 |
| C  | -2.9138  | -2.82811 | -0.47428 |
| C  | -1.96877 | -2.84933 | 0.53691  |
| N  | -1.33477 | -1.7446  | 1.05045  |
| C  | -0.63057 | -2.18767 | 2.14343  |
| C  | -0.79279 | -3.6016  | 2.29218  |
| C  | -1.60437 | -4.01537 | 1.2841   |
| C  | 0.15389  | -1.38971 | 2.95765  |
| C  | 0.43683  | -0.05674 | 2.71247  |
| N  | -0.05174 | 0.66885  | 1.64876  |
| C  | 0.6095   | 1.87457  | 1.67853  |
| C  | 1.5264   | 1.90524  | 2.77539  |
| C  | 1.39528  | 0.72112  | 3.43407  |
| C  | 0.38306  | 2.93273  | 0.81483  |
| C  | -0.64683 | 2.98523  | -0.10779 |
| N  | -1.55094 | 1.98068  | -0.34158 |
| C  | -2.45984 | 2.48616  | -1.2365  |
| C  | -2.1202  | 3.83697  | -1.56876 |
| C  | -0.98325 | 4.13837  | -0.88844 |
| C  | -3.50793 | 1.77668  | -1.79628 |
| S  | -3.16012 | 0.66424  | 2.02394  |
| H  | -2.453   | 1.59669  | 2.69548  |
| H  | -0.41914 | 5.06326  | -0.88978 |
| H  | -2.68051 | 4.46078  | -2.25492 |
| H  | -4.16721 | 2.3083   | -2.47702 |
| H  | -5.39839 | 0.06144  | -3.05832 |
| H  | -4.99422 | -2.53218 | -2.39909 |
| H  | -3.3485  | -3.7783  | -0.77264 |
| H  | -1.9541  | -5.01787 | 1.06882  |
| H  | -0.33037 | -4.19522 | 3.07167  |
| H  | 0.633    | -1.85761 | 3.81351  |
| H  | 1.92986  | 0.37638  | 4.31163  |
| H  | 2.19095  | 2.7335   | 2.98813  |
| H  | 1.04352  | 3.79054  | 0.89719  |
| O  | -0.39207 | 0.19415  | -2.19735 |
| H  | 3.0216   | -0.3889  | 1.65615  |
| C  | 3.8924   | -0.44766 | 0.9898   |
| C  | 3.42972  | -0.9777  | -0.38151 |
| C  | 4.54416  | 0.92231  | 0.9601   |
| H  | 4.5632   | -1.1855  | 1.44858  |

|   |         |          |          |
|---|---------|----------|----------|
| C | 2.98216 | 0.13878  | -1.29699 |
| C | 4.57511 | -1.75515 | -1.06693 |
| C | 3.65361 | 1.9363   | 0.27607  |
| H | 4.78834 | 1.27903  | 1.96565  |
| C | 2.64805 | -0.25334 | -2.70182 |
| C | 2.98828 | 1.43781  | -0.92393 |
| C | 4.30446 | -2.13278 | -2.51799 |
| H | 4.79733 | -2.65021 | -0.46959 |
| H | 5.48188 | -1.13176 | -1.02132 |
| O | 3.57412 | 3.09853  | 0.64947  |
| C | 3.87295 | -0.9244  | -3.33446 |
| H | 1.81888 | -0.96519 | -2.73004 |
| H | 2.33308 | 0.62438  | -3.27572 |
| H | 2.58216 | 2.19673  | -1.59471 |
| H | 5.20471 | -2.58415 | -2.95303 |
| H | 3.51994 | -2.89465 | -2.55687 |
| H | 4.69442 | -0.19514 | -3.39311 |
| H | 3.64382 | -1.21239 | -4.36696 |
| O | 1.64396 | -2.66043 | -1.05327 |
| H | 0.84922 | -2.17999 | -1.31462 |
| H | 5.49313 | 0.89237  | 0.40407  |
| C | 2.24389 | -1.91568 | -0.01934 |
| H | 1.48951 | -1.31183 | 0.49938  |
| H | 2.63312 | -2.64039 | 0.71248  |

$$\Delta E_{\text{solv}} = -2239.99998606$$

$$\Delta G_{\text{correction}} = 0.477928$$

**<sup>2</sup>b1-ts**

Charge = 0 Multiplicity = 2

|    |          |          |          |
|----|----------|----------|----------|
| C  | -3.54188 | -0.3047  | -2.12247 |
| N  | -2.81182 | -0.85111 | -1.10206 |
| C  | -2.95912 | -2.20659 | -1.21025 |
| C  | -3.79308 | -2.52231 | -2.33482 |
| C  | -4.16109 | -1.34228 | -2.89565 |
| Fe | -1.76906 | 0.14112  | 0.29187  |
| O  | -0.36064 | -0.03581 | -0.98871 |
| C  | -2.42335 | -3.14673 | -0.34463 |
| C  | -1.67444 | -2.86889 | 0.78666  |
| N  | -1.26952 | -1.61077 | 1.17885  |
| C  | -0.62679 | -1.78404 | 2.38732  |
| C  | -0.59333 | -3.17153 | 2.73121  |
| C  | -1.23076 | -3.84381 | 1.7347   |
| C  | -0.05081 | -0.7632  | 3.12575  |
| C  | -0.02644 | 0.57325  | 2.75558  |
| N  | -0.60328 | 1.09265  | 1.62436  |
| C  | -0.3376  | 2.43818  | 1.65156  |
| C  | 0.47004  | 2.75931  | 2.79021  |
| C  | 0.65159  | 1.60424  | 3.48358  |
| C  | -0.8401  | 3.37318  | 0.76299  |
| C  | -1.7296  | 3.10968  | -0.26499 |
| N  | -2.2243  | 1.87513  | -0.58531 |
| C  | -3.03378 | 2.0617   | -1.67322 |
| C  | -3.08167 | 3.45384  | -2.02121 |
| C  | -2.26546 | 4.10258  | -1.15309 |
| C  | -3.66452 | 1.05066  | -2.37982 |
| S  | -3.56378 | 0.26082  | 1.66402  |
| H  | -4.27708 | 1.19601  | 1.00267  |
| H  | -2.03047 | 5.15937  | -1.10858 |
| H  | -3.65575 | 3.86414  | -2.84346 |
| H  | -4.27994 | 1.34337  | -3.22674 |
| H  | -4.79285 | -1.17355 | -3.75964 |
| H  | -4.06345 | -3.52687 | -2.63804 |
| H  | -2.64859 | -4.19108 | -0.54522 |
| H  | -1.40491 | -4.90984 | 1.64819  |
| H  | -0.13298 | -3.57335 | 3.62608  |
| H  | 0.43435  | -1.03308 | 4.06041  |
| H  | 1.19218  | 1.4509   | 4.41037  |
| H  | 0.82407  | 3.75424  | 3.03309  |
| H  | -0.53663 | 4.40719  | 0.90544  |
| O  | 0.65686  | 0.8401   | -0.93429 |
| H  | 3.32407  | 1.26917  | 1.11242  |
| C  | 4.10211  | 0.5008   | 0.9911   |
| C  | 3.58758  | -0.55077 | -0.00792 |
| C  | 5.38365  | 1.18619  | 0.56113  |
| H  | 4.21342  | 0.03527  | 1.97933  |

|   |         |          |          |
|---|---------|----------|----------|
| C | 3.74806 | -0.07677 | -1.4452  |
| C | 4.36447 | -1.89256 | 0.11385  |
| C | 5.24284 | 1.81086  | -0.81115 |
| H | 5.69222 | 1.95591  | 1.2738   |
| C | 3.24621 | -1.02384 | -2.484   |
| C | 4.44616 | 1.03074  | -1.76195 |
| C | 4.02583 | -2.90882 | -0.97268 |
| H | 4.19409 | -2.31869 | 1.11147  |
| H | 5.43492 | -1.64486 | 0.06521  |
| O | 5.81911 | 2.83604  | -1.12506 |
| C | 4.07659 | -2.313   | -2.37459 |
| H | 2.1843  | -1.25088 | -2.33712 |
| H | 3.34925 | -0.58319 | -3.4807  |
| H | 4.51834 | 1.34304  | -2.8038  |
| H | 4.72335 | -3.7522  | -0.90019 |
| H | 3.03142 | -3.32483 | -0.78858 |
| H | 5.11687 | -2.07866 | -2.64201 |
| H | 3.72847 | -3.04582 | -3.11118 |
| O | 1.4554  | -1.76726 | -0.15874 |
| H | 0.52055 | -1.72901 | 0.13166  |
| H | 6.21434 | 0.46713  | 0.51131  |
| C | 2.13146 | -0.73119 | 0.3558   |
| H | 1.42747 | 0.36801  | -0.28406 |
| H | 1.8551  | -0.47105 | 1.38571  |

$$\Delta E_{\text{solv}} = -2239.973679$$

$$\Delta G_{\text{correction}} = 0.471799$$

**4b1**

Charge = 0 Multiplicity = 4

|    |          |          |          |
|----|----------|----------|----------|
| C  | 0.27167  | -1.81055 | -2.27062 |
| N  | 0.3039   | -0.51387 | -1.81436 |
| C  | -0.59782 | 0.17373  | -2.58399 |
| C  | -1.23143 | -0.70823 | -3.51579 |
| C  | -0.70356 | -1.94443 | -3.30977 |
| Fe | 1.55477  | 0.26628  | -0.45325 |
| O  | 0.25787  | -0.55497 | 0.93924  |
| C  | -0.8852  | 1.52196  | -2.45752 |
| C  | -0.35695 | 2.35156  | -1.49045 |
| N  | 0.58598  | 1.9818   | -0.55306 |
| C  | 0.7297   | 3.0789   | 0.26804  |
| C  | -0.13399 | 4.13842  | -0.15957 |
| C  | -0.79796 | 3.69314  | -1.25612 |
| C  | 1.60052  | 3.15903  | 1.33704  |
| C  | 2.49001  | 2.16573  | 1.70971  |
| N  | 2.59521  | 0.9392   | 1.10644  |
| C  | 3.64222  | 0.30356  | 1.73454  |
| C  | 4.18876  | 1.14468  | 2.75522  |
| C  | 3.46696  | 2.29535  | 2.7476   |
| C  | 4.08832  | -0.97305 | 1.45271  |
| C  | 3.52336  | -1.83303 | 0.5232   |
| N  | 2.47337  | -1.52017 | -0.29612 |
| C  | 2.14676  | -2.68415 | -0.94188 |
| C  | 3.03223  | -3.73914 | -0.5453  |
| C  | 3.8964   | -3.20661 | 0.35702  |
| C  | 1.10736  | -2.828   | -1.84581 |
| S  | 3.01973  | 0.89897  | -1.9716  |
| H  | 3.67876  | -0.26231 | -2.1697  |
| H  | 4.70194  | -3.6961  | 0.89125  |
| H  | 2.98176  | -4.75693 | -0.91335 |
| H  | 0.96109  | -3.81066 | -2.28689 |
| H  | -0.92998 | -2.87026 | -3.82527 |
| H  | -1.99052 | -0.40563 | -4.22796 |
| H  | -1.6398  | 1.94283  | -3.11471 |
| H  | -1.5653  | 4.18885  | -1.83594 |
| H  | -0.21493 | 5.09999  | 0.33342  |
| H  | 1.61722  | 4.08691  | 1.90269  |
| H  | 3.58338  | 3.16957  | 3.37696  |
| H  | 5.01946  | 0.87329  | 3.39572  |
| H  | 4.9215   | -1.35028 | 2.04017  |
| O  | 0.57063  | -1.4128  | 1.79851  |
| H  | -3.09424 | -1.23644 | -1.4873  |
| C  | -3.95431 | -1.07357 | -0.82178 |
| C  | -3.45834 | -1.1449  | 0.63194  |
| C  | -4.60608 | 0.24048  | -1.20488 |
| H  | -4.63527 | -1.9141  | -1.00886 |

|   |          |          |          |
|---|----------|----------|----------|
| C | -2.85858 | 0.1701   | 1.07022  |
| C | -4.62204 | -1.47282 | 1.5974   |
| C | -3.70746 | 1.4182   | -0.90286 |
| H | -4.88526 | 0.26784  | -2.263   |
| C | -2.38945 | 0.23175  | 2.48788  |
| C | -2.91066 | 1.2889   | 0.31333  |
| C | -4.28267 | -1.32331 | 3.07869  |
| H | -4.97813 | -2.49124 | 1.38888  |
| H | -5.46091 | -0.80404 | 1.35125  |
| O | -3.71989 | 2.43531  | -1.5827  |
| C | -3.61313 | 0.00901  | 3.38852  |
| H | -1.64963 | -0.54334 | 2.70635  |
| H | -1.91399 | 1.1979   | 2.69298  |
| H | -2.44134 | 2.20686  | 0.67023  |
| H | -5.19907 | -1.42925 | 3.67257  |
| H | -3.61897 | -2.13809 | 3.37894  |
| H | -4.3211  | 0.83605  | 3.23264  |
| H | -3.31449 | 0.0542   | 4.44243  |
| O | -1.9727  | -2.80212 | 1.8385   |
| H | -1.10337 | -2.42733 | 2.03172  |
| H | -5.53972 | 0.39339  | -0.64328 |
| C | -2.41445 | -2.29472 | 0.60287  |
| H | -1.56763 | -1.97773 | -0.0241  |
| H | -2.89883 | -3.13081 | 0.0761   |

$$\Delta E_{\text{solv}} = -2240.01544763$$

$$\Delta G_{\text{correction}} = 0.476042$$

**4b1-ts**

Charge = 0 Multiplicity = 4

|    |          |          |          |
|----|----------|----------|----------|
| C  | 0.26184  | 1.37343  | -2.61226 |
| N  | 0.81499  | 1.48338  | -1.36042 |
| C  | 0.78537  | 2.81464  | -1.05002 |
| C  | 0.17923  | 3.55881  | -2.1137  |
| C  | -0.13061 | 2.66733  | -3.08996 |
| Fe | 1.62343  | 0.01113  | -0.2513  |
| O  | -0.1105  | -0.17176 | 0.46658  |
| C  | 1.29197  | 3.37545  | 0.10937  |
| C  | 1.9573   | 2.68683  | 1.10549  |
| N  | 2.19828  | 1.33528  | 1.11843  |
| C  | 2.87711  | 1.08567  | 2.28486  |
| C  | 3.08183  | 2.30585  | 3.00849  |
| C  | 2.50257  | 3.2957   | 2.28334  |
| C  | 3.27011  | -0.16384 | 2.72802  |
| C  | 2.99966  | -1.35779 | 2.08085  |
| N  | 2.31981  | -1.47623 | 0.90032  |
| C  | 2.27282  | -2.81741 | 0.62263  |
| C  | 2.92612  | -3.55778 | 1.66188  |
| C  | 3.3828   | -2.65171 | 2.564    |
| C  | 1.69596  | -3.38905 | -0.49652 |
| C  | 1.11089  | -2.69676 | -1.54659 |
| N  | 1.02395  | -1.33492 | -1.64239 |
| C  | 0.39497  | -1.07454 | -2.83082 |
| C  | 0.09022  | -2.30189 | -3.50553 |
| C  | 0.52937  | -3.31004 | -2.7046  |
| C  | 0.06823  | 0.18912  | -3.30078 |
| S  | 3.60326  | 0.21536  | -1.30399 |
| H  | 3.29402  | -0.3745  | -2.47704 |
| H  | 0.48166  | -4.37896 | -2.87839 |
| H  | -0.39996 | -2.37    | -4.46988 |
| H  | -0.40452 | 0.25173  | -4.27803 |
| H  | -0.59948 | 2.85208  | -4.04967 |
| H  | 0.00951  | 4.62826  | -2.09248 |
| H  | 1.15669  | 4.44479  | 0.24397  |
| H  | 2.43915  | 4.35291  | 2.51169  |
| H  | 3.59363  | 2.37657  | 3.96096  |
| H  | 3.81171  | -0.21435 | 3.66894  |
| H  | 3.92965  | -2.82869 | 3.48256  |
| H  | 3.02416  | -4.63694 | 1.6799   |
| H  | 1.72381  | -4.47357 | -0.57055 |
| O  | -0.4844  | -1.38707 | 0.92672  |
| H  | -1.8478  | 0.16183  | -1.20873 |
| C  | -2.91815 | 0.3937   | -1.155   |
| C  | -3.5247  | -0.4143  | 0.00714  |
| C  | -3.05919 | 1.89601  | -1.01205 |
| H  | -3.35294 | 0.04428  | -2.10182 |

|   |          |          |          |
|---|----------|----------|----------|
| C | -3.26227 | 0.26317  | 1.34497  |
| C | -5.06605 | -0.54497 | -0.13397 |
| C | -2.50259 | 2.38866  | 0.30566  |
| H | -2.55929 | 2.42522  | -1.82836 |
| C | -3.80366 | -0.46124 | 2.53347  |
| C | -2.74353 | 1.5012   | 1.44457  |
| C | -5.76743 | -1.14427 | 1.08264  |
| H | -5.29763 | -1.12488 | -1.03766 |
| H | -5.45489 | 0.46801  | -0.31539 |
| O | -1.98663 | 3.48723  | 0.4272   |
| C | -5.33346 | -0.49928 | 2.39368  |
| H | -3.41441 | -1.48494 | 2.58747  |
| H | -3.51307 | 0.04832  | 3.45795  |
| H | -2.55603 | 1.93289  | 2.42801  |
| H | -6.85239 | -1.03998 | 0.95773  |
| H | -5.57036 | -2.21877 | 1.12537  |
| H | -5.70948 | 0.53248  | 2.44504  |
| H | -5.77755 | -1.03007 | 3.24385  |
| O | -3.39473 | -2.80541 | 0.62017  |
| H | -2.94647 | -3.62064 | 0.3679   |
| H | -4.11597 | 2.20088  | -1.05019 |
| C | -2.83212 | -1.76322 | -0.08226 |
| H | -1.51778 | -1.5405  | 0.49905  |
| H | -2.53204 | -2.03984 | -1.10353 |

$$\Delta E_{\text{solv}} = -2239.97269273$$

$$\Delta G_{\text{correction}} = 0.470568$$



**4b2**

Charge = 0 Multiplicity = 4

|    |          |          |          |
|----|----------|----------|----------|
| C  | -0.22867 | 0.56217  | -2.80157 |
| N  | 0.59107  | 0.93799  | -1.77039 |
| C  | 0.70286  | 2.30247  | -1.84773 |
| C  | -0.09104 | 2.79742  | -2.93399 |
| C  | -0.65051 | 1.71695  | -3.53883 |
| Fe | 1.50211  | -0.25875 | -0.4446  |
| O  | 0.21112  | 0.29228  | 0.78167  |
| C  | 1.5235   | 3.08461  | -1.0521  |
| C  | 2.42585  | 2.60211  | -0.11808 |
| N  | 2.59768  | 1.28544  | 0.20255  |
| C  | 3.58495  | 1.24183  | 1.14584  |
| C  | 4.07916  | 2.56622  | 1.3974   |
| C  | 3.34754  | 3.41148  | 0.62785  |
| C  | 3.98006  | 0.10897  | 1.83806  |
| C  | 3.36996  | -1.13129 | 1.75646  |
| N  | 2.3353   | -1.45316 | 0.92113  |
| C  | 1.96964  | -2.73267 | 1.23628  |
| C  | 2.79791  | -3.23247 | 2.29575  |
| C  | 3.67728  | -2.24554 | 2.60572  |
| C  | 0.98696  | -3.4632  | 0.58925  |
| C  | 0.28165  | -3.03467 | -0.52438 |
| N  | 0.40706  | -1.79935 | -1.11237 |
| C  | -0.389   | -1.82184 | -2.23042 |
| C  | -1.02325 | -3.09983 | -2.35224 |
| C  | -0.62491 | -3.84494 | -1.28002 |
| C  | -0.66338 | -0.73017 | -3.04018 |
| S  | 3.17991  | -0.70571 | -1.89605 |
| H  | 3.00998  | -2.04387 | -1.9564  |
| H  | -0.88791 | -4.86794 | -1.03603 |
| H  | -1.69379 | -3.3801  | -3.15685 |
| H  | -1.3224  | -0.89003 | -3.88952 |
| H  | -1.30721 | 1.69079  | -4.40049 |
| H  | -0.17954 | 3.84301  | -3.20487 |
| H  | 1.49714  | 4.1593   | -1.21189 |
| H  | 3.41375  | 4.49067  | 0.55942  |
| H  | 4.86899  | 2.80565  | 2.09936  |
| H  | 4.78496  | 0.22126  | 2.55979  |
| H  | 4.46029  | -2.2507  | 3.35463  |
| H  | 2.71208  | -4.22131 | 2.73051  |
| H  | 0.79183  | -4.47033 | 0.94833  |
| O  | 0.66558  | 0.44767  | 2.08956  |
| H  | -1.75486 | 1.39015  | -0.74267 |
| C  | -2.75069 | 1.70901  | -0.4198  |
| C  | -3.51202 | 0.48521  | 0.13864  |
| C  | -2.55545 | 2.83531  | 0.58771  |
| H  | -3.25863 | 2.06537  | -1.32438 |

|   |          |          |          |
|---|----------|----------|----------|
| C | -3.30874 | 0.31454  | 1.63369  |
| C | -5.01286 | 0.56217  | -0.19598 |
| C | -1.82331 | 2.26703  | 1.77585  |
| H | -1.9764  | 3.65805  | 0.15873  |
| C | -4.11154 | -0.77564 | 2.26769  |
| C | -2.4301  | 1.0732   | 2.33165  |
| C | -5.88617 | -0.46572 | 0.51715  |
| H | -5.13671 | 0.48587  | -1.28417 |
| H | -5.35039 | 1.5735   | 0.07683  |
| O | -0.79281 | 2.77209  | 2.22793  |
| C | -5.59989 | -0.52085 | 2.01125  |
| H | -3.84632 | -1.75177 | 1.83739  |
| H | -3.89575 | -0.82997 | 3.34014  |
| H | -2.15379 | 0.80142  | 3.35124  |
| H | -6.94254 | -0.22862 | 0.34131  |
| H | -5.71765 | -1.45586 | 0.08181  |
| H | -5.88849 | 0.42792  | 2.48675  |
| H | -6.20377 | -1.30001 | 2.49107  |
| O | -3.47706 | -1.87532 | -0.6118  |
| H | -2.82639 | -2.55156 | -0.85625 |
| H | -3.52145 | 3.24329  | 0.91638  |
| C | -2.8102  | -0.7087  | -0.43109 |
| H | 0.22263  | 1.29308  | 2.35108  |
| H | -1.73695 | -0.77738 | -0.24929 |

$$\Delta E_{\text{solv}} = -2239.98956937$$

$$\Delta G_{\text{correction}} = 0.476238$$

#### 4. Coordinates of all stationary points in Fig. 7 and Fig. S1

**<sup>2</sup>c1**

Charge = 0 Multiplicity = 2

|    |          |          |          |
|----|----------|----------|----------|
| C  | -0.7291  | -0.70814 | 1.86602  |
| N  | 0.38337  | -1.13146 | 1.18055  |
| C  | 0.38575  | -2.50047 | 1.28076  |
| C  | -0.7726  | -2.94523 | 1.99572  |
| C  | -1.45437 | -1.83295 | 2.37254  |
| Fe | 1.83351  | 0.02495  | 0.39906  |
| O  | 0.86413  | -0.32525 | -1.36958 |
| C  | 1.39927  | -3.33043 | 0.83677  |
| C  | 2.58968  | -2.90414 | 0.2739   |
| N  | 2.92297  | -1.59692 | 0.00759  |
| C  | 4.17783  | -1.6328  | -0.55315 |
| C  | 4.64787  | -2.9804  | -0.61446 |
| C  | 3.6586   | -3.76918 | -0.11405 |
| C  | 4.85782  | -0.53821 | -1.05797 |
| C  | 4.35706  | 0.74945  | -1.11108 |
| N  | 3.13787  | 1.1448   | -0.62282 |
| C  | 3.04229  | 2.48723  | -0.89092 |
| C  | 4.21244  | 2.93561  | -1.58418 |
| C  | 5.03258  | 1.86113  | -1.7106  |
| C  | 1.99813  | 3.30734  | -0.50766 |
| C  | 0.90806  | 2.9056   | 0.24483  |
| N  | 0.6786   | 1.6237   | 0.68915  |
| C  | -0.47417 | 1.69027  | 1.44206  |
| C  | -0.97038 | 3.03048  | 1.47141  |
| C  | -0.1211  | 3.77881  | 0.71455  |
| C  | -1.11386 | 0.611    | 2.02491  |
| S  | 2.92349  | 0.2753   | 2.39153  |
| H  | 2.20293  | 1.3078   | 2.87501  |
| H  | -0.17568 | 4.83755  | 0.49052  |
| H  | -1.87913 | 3.32917  | 1.98209  |
| H  | -2.01131 | 0.81865  | 2.6012   |
| H  | -2.37638 | -1.76181 | 2.93683  |
| H  | -1.01209 | -3.98335 | 2.19277  |
| H  | 1.2722   | -4.39929 | 0.98549  |
| H  | 3.64426  | -4.84757 | -0.01063 |
| H  | 5.61084  | -3.27801 | -1.0118  |
| H  | 5.84393  | -0.71188 | -1.47983 |
| H  | 6.01022  | 1.80847  | -2.17453 |
| H  | 4.37677  | 3.95363  | -1.91637 |
| H  | 2.05469  | 4.35609  | -0.78583 |
| H  | -2.58123 | 1.99766  | -0.83415 |
| C  | -3.59096 | 1.64659  | -1.08521 |
| C  | -3.57779 | 0.09804  | -1.163   |
| C  | -4.55107 | 2.24345  | -0.06791 |

|   |          |          |          |
|---|----------|----------|----------|
| H | -3.78652 | 2.04543  | -2.0853  |
| C | -3.99765 | -0.55901 | 0.13931  |
| C | -4.54981 | -0.37864 | -2.268   |
| C | -2.1087  | -0.23556 | -1.52158 |
| C | -4.30121 | 1.62036  | 1.28153  |
| H | -4.43889 | 3.32995  | -0.00271 |
| C | -4.19639 | -2.04427 | 0.13229  |
| C | -4.27666 | 0.15961  | 1.2453   |
| C | -4.7391  | -1.88767 | -2.32171 |
| H | -4.19057 | 0.00541  | -3.22711 |
| H | -5.52208 | 0.10407  | -2.08246 |
| O | -1.88902 | 0.30269  | -2.79603 |
| O | -4.15455 | 2.26064  | 2.31336  |
| C | -5.18114 | -2.43735 | -0.97441 |
| H | -3.24232 | -2.54765 | -0.04743 |
| H | -4.56516 | -2.3705  | 1.11231  |
| H | -4.51828 | -0.34887 | 2.18041  |
| H | -5.47864 | -2.13633 | -3.0928  |
| H | -3.79964 | -2.36107 | -2.62541 |
| H | -6.17827 | -2.04485 | -0.72485 |
| H | -5.28127 | -3.52858 | -1.00754 |
| H | -0.93433 | 0.4034   | -2.92068 |
| O | -1.82797 | -1.61393 | -1.47136 |
| H | -0.86474 | -1.69263 | -1.46119 |
| H | -1.46105 | 0.27095  | -0.78454 |
| H | -5.59478 | 2.04198  | -0.34905 |
| O | 0.90763  | 0.55396  | -2.2776  |

$$\Delta E_{\text{solv}} = -2315.2320344$$

$$\Delta G_{\text{correction}} = 0.480176$$

**<sup>2</sup>c1-ts**

Charge = 0 Multiplicity = 2

|    |          |          |          |
|----|----------|----------|----------|
| C  | -0.72317 | -0.86369 | 1.87235  |
| N  | 0.4128   | -1.22204 | 1.19155  |
| C  | 0.47944  | -2.58916 | 1.25995  |
| C  | -0.66496 | -3.10307 | 1.95223  |
| C  | -1.40322 | -2.03219 | 2.34313  |
| Fe | 1.77179  | 0.01042  | 0.36483  |
| O  | 0.81014  | -0.30322 | -1.24439 |
| C  | 1.53777  | -3.3587  | 0.80996  |
| C  | 2.7037   | -2.86542 | 0.25115  |
| N  | 2.96665  | -1.5427  | -0.00872 |
| C  | 4.21039  | -1.50998 | -0.59116 |
| C  | 4.74968  | -2.83244 | -0.6686  |
| C  | 3.81176  | -3.67304 | -0.15762 |
| C  | 4.8222   | -0.37928 | -1.10155 |
| C  | 4.25918  | 0.88419  | -1.12702 |
| N  | 3.03807  | 1.2165   | -0.60417 |
| C  | 2.87874  | 2.55863  | -0.83512 |
| C  | 4.01294  | 3.07274  | -1.54335 |
| C  | 4.87384  | 2.03722  | -1.71477 |
| C  | 1.81477  | 3.32622  | -0.40182 |
| C  | 0.76072  | 2.86605  | 0.37017  |
| N  | 0.58431  | 1.56754  | 0.77628  |
| C  | -0.55286 | 1.5639   | 1.54878  |
| C  | -1.08817 | 2.88751  | 1.64708  |
| C  | -0.28173 | 3.6905   | 0.90047  |
| C  | -1.15656 | 0.43522  | 2.07916  |
| S  | 2.85269  | 0.278    | 2.32212  |
| H  | 2.00632  | 1.14866  | 2.90954  |
| H  | -0.37446 | 4.75454  | 0.71811  |
| H  | -1.99346 | 3.1368   | 2.18929  |
| H  | -2.05744 | 0.58514  | 2.66812  |
| H  | -2.33243 | -2.01548 | 2.9      |
| H  | -0.85596 | -4.15511 | 2.12712  |
| H  | 1.46495  | -4.43486 | 0.9421   |
| H  | 3.85312  | -4.7515  | -0.06229 |
| H  | 5.71959  | -3.07695 | -1.0848  |
| H  | 5.80575  | -0.49976 | -1.54737 |
| H  | 5.84276  | 2.03695  | -2.19946 |
| H  | 4.12793  | 4.10508  | -1.85117 |
| H  | 1.82491  | 4.38342  | -0.65261 |
| H  | -2.50493 | 1.98629  | -0.59708 |
| C  | -3.50221 | 1.67241  | -0.92734 |
| C  | -3.49428 | 0.14552  | -1.16773 |
| C  | -4.51175 | 2.16034  | 0.09996  |
| H  | -3.64759 | 2.17786  | -1.88701 |
| C  | -3.96356 | -0.64779 | 0.02987  |

|   |          |          |          |
|---|----------|----------|----------|
| C | -4.39069 | -0.20735 | -2.37683 |
| C | -1.98653 | -0.16242 | -1.51958 |
| C | -4.32477 | 1.39756  | 1.38618  |
| H | -4.40611 | 3.23347  | 0.28547  |
| C | -4.15833 | -2.12197 | -0.15019 |
| C | -4.28269 | -0.05182 | 1.19821  |
| C | -4.60645 | -1.69812 | -2.59439 |
| H | -3.95471 | 0.26288  | -3.26578 |
| H | -5.36479 | 0.27954  | -2.21173 |
| O | -1.59449 | 0.59604  | -2.54386 |
| O | -4.23712 | 1.92541  | 2.48594  |
| C | -5.10543 | -2.37813 | -1.32825 |
| H | -3.19771 | -2.60365 | -0.35443 |
| H | -4.56093 | -2.55639 | 0.77248  |
| H | -4.55549 | -0.65772 | 2.06401  |
| H | -5.3238  | -1.84661 | -3.41094 |
| H | -3.66718 | -2.15887 | -2.91492 |
| H | -6.10617 | -1.99876 | -1.07296 |
| H | -5.21838 | -3.45747 | -1.48306 |
| H | -0.15768 | 0.62224  | -2.56467 |
| O | -1.75223 | -1.54849 | -1.6697  |
| H | -0.78975 | -1.64419 | -1.70945 |
| H | -1.40118 | 0.16407  | -0.61706 |
| H | -5.54043 | 1.9927   | -0.25057 |
| O | 0.81575  | 0.67938  | -2.18087 |

$$\Delta E_{\text{solv}} = -2315.20131509$$

$$\Delta G_{\text{correction}} = 0.478947$$

**<sup>2</sup>c2**

Charge = 0 Multiplicity = 2

|    |          |          |          |
|----|----------|----------|----------|
| C  | -0.73677 | -0.86217 | 1.76904  |
| N  | 0.42868  | -1.22314 | 1.14452  |
| C  | 0.49524  | -2.58894 | 1.23103  |
| C  | -0.6717  | -3.09892 | 1.88764  |
| C  | -1.43179 | -2.02636 | 2.22895  |
| Fe | 1.81241  | 0.00224  | 0.34785  |
| O  | 0.84604  | -0.23294 | -1.23784 |
| C  | 1.56361  | -3.36146 | 0.80977  |
| C  | 2.7358   | -2.87799 | 0.25337  |
| N  | 3.00376  | -1.55995 | -0.01477 |
| C  | 4.24737  | -1.53845 | -0.59374 |
| C  | 4.78033  | -2.86528 | -0.66779 |
| C  | 3.8398   | -3.69686 | -0.14965 |
| C  | 4.87471  | -0.40917 | -1.09014 |
| C  | 4.3367   | 0.86575  | -1.09213 |
| N  | 3.11913  | 1.209    | -0.56905 |
| C  | 2.98958  | 2.55751  | -0.76645 |
| C  | 4.14179  | 3.06902  | -1.44777 |
| C  | 4.98158  | 2.02046  | -1.64326 |
| C  | 1.92558  | 3.33476  | -0.34281 |
| C  | 0.83505  | 2.88062  | 0.37875  |
| N  | 0.63308  | 1.58195  | 0.7663   |
| C  | -0.54734 | 1.57538  | 1.4587   |
| C  | -1.09074 | 2.89985  | 1.53468  |
| C  | -0.23606 | 3.70757  | 0.85208  |
| C  | -1.18491 | 0.4389   | 1.9417   |
| S  | 2.84985  | 0.25181  | 2.3285   |
| H  | 1.99245  | 1.11155  | 2.91598  |
| H  | -0.31269 | 4.77395  | 0.67625  |
| H  | -2.02345 | 3.14835  | 2.02914  |
| H  | -2.1133  | 0.58651  | 2.48742  |
| H  | -2.38246 | -2.00652 | 2.7481   |
| H  | -0.86483 | -4.14912 | 2.07115  |
| H  | 1.4872   | -4.43642 | 0.95124  |
| H  | 3.87518  | -4.77478 | -0.0462  |
| H  | 5.74914  | -3.11662 | -1.08247 |
| H  | 5.85823  | -0.53811 | -1.53419 |
| H  | 5.95445  | 2.01301  | -2.11986 |
| H  | 4.28102  | 4.10701  | -1.72519 |
| H  | 1.95999  | 4.39543  | -0.5777  |
| H  | -2.77794 | 2.08637  | -0.62662 |
| C  | -3.75122 | 1.68335  | -0.92909 |
| C  | -3.62259 | 0.15734  | -1.15136 |
| C  | -4.77525 | 2.10278  | 0.11506  |
| H  | -3.96029 | 2.1619   | -1.8912  |
| C  | -4.07423 | -0.66727 | 0.03042  |

|   |          |          |          |
|---|----------|----------|----------|
| C | -4.41622 | -0.26665 | -2.40657 |
| C | -2.06815 | -0.04665 | -1.41961 |
| C | -4.50484 | 1.35559  | 1.3961   |
| H | -4.73906 | 3.18081  | 0.29726  |
| C | -4.19015 | -2.15031 | -0.1553  |
| C | -4.41154 | -0.09269 | 1.20434  |
| C | -4.51112 | -1.76918 | -2.62244 |
| H | -3.96726 | 0.23214  | -3.27334 |
| H | -5.43115 | 0.14823  | -2.30033 |
| O | -1.652   | 0.71798  | -2.40868 |
| O | -4.38785 | 1.8896   | 2.48868  |
| C | -5.04788 | -2.46908 | -1.3834  |
| H | -3.19504 | -2.58373 | -0.29486 |
| H | -4.62098 | -2.59932 | 0.74745  |
| H | -4.65603 | -0.71281 | 2.06839  |
| H | -5.15767 | -1.97338 | -3.48464 |
| H | -3.52204 | -2.16657 | -2.87196 |
| H | -6.08315 | -2.14751 | -1.19568 |
| H | -5.08799 | -3.55409 | -1.53342 |
| H | -0.01658 | 0.77092  | -2.53127 |
| O | -1.72243 | -1.40923 | -1.48504 |
| H | -0.75576 | -1.42169 | -1.57933 |
| H | -1.59429 | 0.35812  | -0.47984 |
| H | -5.79535 | 1.86117  | -0.2158  |
| O | 0.92113  | 0.77639  | -2.18191 |

$$\Delta E_{\text{solv}} = -2315.21362732$$

$$\Delta G_{\text{correction}} = 0.481165$$



**<sup>2</sup>c2-ts**

Charge = 0 Multiplicity = 2

|    |          |          |          |
|----|----------|----------|----------|
| C  | 0.71866  | 0.74499  | 1.84921  |
| N  | -0.40398 | 1.16864  | 1.18607  |
| C  | -0.41068 | 2.53514  | 1.29291  |
| C  | 0.75301  | 2.98048  | 2.0007   |
| C  | 1.44731  | 1.86851  | 2.35545  |
| Fe | -1.82022 | 0.02414  | 0.32803  |
| O  | -0.84187 | 0.22777  | -1.25428 |
| C  | -1.42716 | 3.36314  | 0.84987  |
| C  | -2.60596 | 2.94337  | 0.25609  |
| N  | -2.93206 | 1.64282  | -0.02988 |
| C  | -4.16351 | 1.68626  | -0.6344  |
| C  | -4.62868 | 3.03841  | -0.70769 |
| C  | -3.6594  | 3.81874  | -0.16319 |
| C  | -4.83769 | 0.59311  | -1.14935 |
| C  | -4.36261 | -0.70719 | -1.1553  |
| N  | -3.17072 | -1.11179 | -0.62033 |
| C  | -3.09495 | -2.45994 | -0.83818 |
| C  | -4.2597  | -2.91189 | -1.54001 |
| C  | -5.05084 | -1.82489 | -1.73051 |
| C  | -2.06564 | -3.28635 | -0.41962 |
| C  | -0.96475 | -2.89098 | 0.31974  |
| N  | -0.71341 | -1.60963 | 0.73818  |
| C  | 0.44452  | -1.67032 | 1.4631   |
| C  | 0.93061  | -3.01814 | 1.51906  |
| C  | 0.06049  | -3.77263 | 0.79561  |
| C  | 1.11071  | -0.57489 | 2.00148  |
| S  | -2.90726 | -0.23248 | 2.29008  |
| H  | -2.07802 | -1.11475 | 2.88411  |
| H  | 0.09558  | -4.8374  | 0.59768  |
| H  | 1.84287  | -3.31353 | 2.02621  |
| H  | 2.01358  | -0.77505 | 2.57317  |
| H  | 2.37455  | 1.79651  | 2.91215  |
| H  | 0.98563  | 4.01788  | 2.21016  |
| H  | -1.3038  | 4.43142  | 1.00809  |
| H  | -3.64468 | 4.89622  | -0.05017 |
| H  | -5.57541 | 3.34048  | -1.13928 |
| H  | -5.80619 | 0.77427  | -1.6081  |
| H  | -6.01578 | -1.76826 | -2.21986 |
| H  | -4.43995 | -3.93872 | -1.83498 |
| H  | -2.14135 | -4.34085 | -0.67242 |
| H  | 4.0527   | -1.98786 | -2.22815 |
| C  | 4.45821  | -1.52688 | -1.32203 |
| C  | 4.01148  | -0.08069 | -1.25467 |
| C  | 4.08519  | -2.33457 | -0.09219 |
| H  | 5.55221  | -1.51534 | -1.44075 |
| C  | 4.37951  | 0.58761  | 0.00449  |

|   |          |          |          |
|---|----------|----------|----------|
| C | 4.3012   | 0.67129  | -2.54337 |
| C | 2.17577  | -0.21466 | -1.14122 |
| C | 4.25929  | -1.58778 | 1.21321  |
| H | 3.03442  | -2.65339 | -0.14915 |
| C | 4.47692  | 2.08266  | 0.03823  |
| C | 4.52119  | -0.15313 | 1.13896  |
| C | 4.26172  | 2.1883   | -2.447   |
| H | 3.63121  | 0.29849  | -3.3264  |
| H | 5.31271  | 0.36363  | -2.85694 |
| O | 1.74368  | -0.94916 | -2.06889 |
| O | 4.13036  | -2.15826 | 2.29071  |
| C | 5.05314  | 2.67334  | -1.24318 |
| H | 3.45651  | 2.46969  | 0.17506  |
| H | 5.04482  | 2.3934   | 0.92325  |
| H | 4.75525  | 0.33271  | 2.08706  |
| H | 4.65942  | 2.62047  | -3.37272 |
| H | 3.22436  | 2.5271   | -2.36292 |
| H | 6.10911  | 2.38281  | -1.34594 |
| H | 5.04363  | 3.76738  | -1.18412 |
| H | 0.03624  | -0.92238 | -2.4038  |
| O | 1.76261  | 1.10767  | -1.03224 |
| H | 0.83151  | 1.12242  | -1.32876 |
| H | 2.20047  | -0.66598 | -0.1246  |
| H | 4.65481  | -3.26784 | -0.02626 |
| O | -0.92325 | -0.79482 | -2.19869 |

$$\Delta E_{\text{solv}} = -2315.21253813$$

$$\Delta G_{\text{correction}} = 0.481165$$

**<sup>2</sup>c3**

Charge = 0 Multiplicity = 2

|    |          |          |          |
|----|----------|----------|----------|
| C  | 0.71862  | 0.74504  | 1.84926  |
| N  | -0.40403 | 1.16866  | 1.18609  |
| C  | -0.41076 | 2.53517  | 1.29294  |
| C  | 0.75289  | 2.98053  | 2.00077  |
| C  | 1.44721  | 1.86859  | 2.35554  |
| Fe | -1.82021 | 0.02413  | 0.32802  |
| O  | -0.84184 | 0.22778  | -1.25427 |
| C  | -1.42726 | 3.36314  | 0.84988  |
| C  | -2.60603 | 2.94334  | 0.25608  |
| N  | -2.9321  | 1.64278  | -0.0299  |
| C  | -4.16354 | 1.68619  | -0.63442 |
| C  | -4.62875 | 3.03833  | -0.70771 |
| C  | -3.65949 | 3.81868  | -0.16321 |
| C  | -4.8377  | 0.59303  | -1.14937 |
| C  | -4.36258 | -0.70726 | -1.15533 |
| N  | -3.17067 | -1.11183 | -0.62036 |
| C  | -3.09485 | -2.45998 | -0.83823 |
| C  | -4.25959 | -2.91195 | -1.54007 |
| C  | -5.05076 | -1.82498 | -1.73056 |
| C  | -2.06552 | -3.28635 | -0.41967 |
| C  | -0.96465 | -2.89096 | 0.3197   |
| N  | -0.71337 | -1.60961 | 0.73818  |
| C  | 0.44456  | -1.67027 | 1.46311  |
| C  | 0.93069  | -3.01807 | 1.51906  |
| C  | 0.06061  | -3.77258 | 0.79558  |
| C  | 1.1107   | -0.57482 | 2.00151  |
| S  | -2.90728 | -0.23253 | 2.29005  |
| H  | -2.07798 | -1.11473 | 2.88411  |
| H  | 0.09574  | -4.83734 | 0.59763  |
| H  | 1.84294  | -3.31344 | 2.02622  |
| H  | 2.01356  | -0.77496 | 2.57323  |
| H  | 2.37442  | 1.79661  | 2.91228  |
| H  | 0.98547  | 4.01794  | 2.21024  |
| H  | -1.30392 | 4.43142  | 1.0081   |
| H  | -3.6448  | 4.89616  | -0.05019 |
| H  | -5.57548 | 3.34038  | -1.13931 |
| H  | -5.8062  | 0.77416  | -1.60813 |
| H  | -6.0157  | -1.76837 | -2.2199  |
| H  | -4.4398  | -3.93878 | -1.83506 |
| H  | -2.14119 | -4.34085 | -0.6725  |
| H  | 4.05269  | -1.98797 | -2.22798 |
| C  | 4.45819  | -1.52691 | -1.32188 |
| C  | 4.01144  | -0.08072 | -1.25463 |
| C  | 4.08515  | -2.33451 | -0.09199 |
| H  | 5.55218  | -1.51537 | -1.44059 |
| C  | 4.37947  | 0.58767  | 0.00448  |

|   |          |          |          |
|---|----------|----------|----------|
| C | 4.3012   | 0.67117  | -2.54338 |
| C | 2.17577  | -0.21465 | -1.14122 |
| C | 4.25929  | -1.58764 | 1.21336  |
| H | 3.03437  | -2.65329 | -0.14892 |
| C | 4.47687  | 2.08273  | 0.03811  |
| C | 4.52117  | -0.15299 | 1.139    |
| C | 4.26175  | 2.18818  | -2.44713 |
| H | 3.63123  | 0.29833  | -3.3264  |
| H | 5.31271  | 0.36346  | -2.85692 |
| O | 1.74369  | -0.94925 | -2.06881 |
| O | 4.13045  | -2.15806 | 2.2909   |
| C | 5.05315  | 2.6733   | -1.24333 |
| H | 3.45645  | 2.46975  | 0.17485  |
| H | 5.04472  | 2.39354  | 0.92314  |
| H | 4.75524  | 0.33292  | 2.08707  |
| H | 4.6595   | 2.62028  | -3.37287 |
| H | 3.22441  | 2.52701  | -2.36311 |
| H | 6.10912  | 2.38275  | -1.34602 |
| H | 5.04365  | 3.76734  | -1.18434 |
| H | 0.03628  | -0.92241 | -2.40376 |
| O | 1.7626   | 1.10771  | -1.03244 |
| H | 0.8315   | 1.1224   | -1.32896 |
| H | 2.20038  | -0.66584 | -0.12454 |
| H | 4.65473  | -3.26781 | -0.02601 |
| O | -0.92321 | -0.79482 | -2.19867 |

$$\Delta E_{\text{solv}} = -2315.26292178$$

$$\Delta G_{\text{correction}} = 0.471928$$

**<sup>2</sup>c3-ts**

Charge = 0 Multiplicity = 2

|    |          |          |          |
|----|----------|----------|----------|
| C  | 4.0104   | -0.16844 | -0.30918 |
| N  | 2.95528  | 0.70102  | -0.24665 |
| C  | 3.35016  | 1.8195   | -0.92847 |
| C  | 4.68383  | 1.64896  | -1.43811 |
| C  | 5.09782  | 0.41805  | -1.04446 |
| Fe | 1.19082  | 0.39267  | 0.67857  |
| O  | 0.56447  | -0.13869 | -1.07386 |
| C  | 2.58017  | 2.96063  | -1.08775 |
| C  | 1.32324  | 3.16963  | -0.54001 |
| N  | 0.63238  | 2.26487  | 0.21839  |
| C  | -0.50556 | 2.9075   | 0.6273   |
| C  | -0.54581 | 4.23848  | 0.09148  |
| C  | 0.58557  | 4.39783  | -0.64111 |
| C  | -1.49577 | 2.3407   | 1.41321  |
| C  | -1.52027 | 1.02312  | 1.85119  |
| N  | -0.56432 | 0.08474  | 1.57548  |
| C  | -1.03124 | -1.09417 | 2.10493  |
| C  | -2.30652 | -0.88605 | 2.73194  |
| C  | -2.60502 | 0.43103  | 2.58493  |
| C  | -0.36279 | -2.30524 | 2.06336  |
| C  | 0.91621  | -2.50126 | 1.5569   |
| N  | 1.69686  | -1.52563 | 1.00491  |
| C  | 2.91118  | -2.10631 | 0.75234  |
| C  | 2.88487  | -3.48983 | 1.13341  |
| C  | 1.64134  | -3.73891 | 1.62186  |
| C  | 3.99864  | -1.46819 | 0.17518  |
| S  | 2.16377  | 1.05854  | 2.59211  |
| H  | 1.21152  | 0.69947  | 3.48146  |
| H  | 1.2459   | -4.66756 | 2.01714  |
| H  | 3.72208  | -4.17239 | 1.04019  |
| H  | 4.90303  | -2.05654 | 0.03791  |
| H  | 6.04702  | -0.06866 | -1.23645 |
| H  | 5.22453  | 2.39002  | -2.0153  |
| H  | 3.01359  | 3.77809  | -1.65935 |
| H  | 0.9099   | 5.26866  | -1.19872 |
| H  | -1.36055 | 4.93622  | 0.24002  |
| H  | -2.33974 | 2.97328  | 1.67968  |
| H  | -3.48143 | 0.96893  | 2.93089  |
| H  | -2.88031 | -1.65694 | 3.23512  |
| H  | -0.85709 | -3.16389 | 2.51265  |
| H  | -1.50732 | -0.77129 | -1.5804  |
| C  | -2.47692 | -0.17895 | -2.22497 |
| C  | -3.55323 | -0.75531 | -1.54416 |
| C  | -2.15084 | 1.28606  | -2.07234 |
| H  | -2.23621 | -0.63589 | -3.19152 |
| C  | -4.25671 | -0.02557 | -0.52653 |

|   |          |          |          |
|---|----------|----------|----------|
| C | -3.9221  | -2.17727 | -1.84167 |
| C | 2.22693  | -2.26653 | -2.40935 |
| C | -3.14434 | 2.08323  | -1.26536 |
| H | -1.17338 | 1.39143  | -1.56069 |
| C | -5.23811 | -0.72482 | 0.37739  |
| C | -4.03006 | 1.31669  | -0.39203 |
| C | -4.58517 | -2.89035 | -0.67307 |
| H | -3.03721 | -2.71943 | -2.199   |
| H | -4.61433 | -2.17184 | -2.69957 |
| O | 1.1767   | -2.86682 | -2.3085  |
| O | -3.21239 | 3.30027  | -1.3268  |
| C | -5.74543 | -2.05598 | -0.15638 |
| H | -4.72242 | -0.89756 | 1.33351  |
| H | -6.06664 | -0.04752 | 0.61366  |
| H | -4.62159 | 1.90311  | 0.31115  |
| H | -4.91712 | -3.88664 | -0.9833  |
| H | -3.85045 | -3.04468 | 0.13024  |
| H | -6.4656  | -1.89026 | -0.97027 |
| H | -6.29389 | -2.58603 | 0.62934  |
| H | 0.00075  | -1.91007 | -1.5067  |
| O | 3.35339  | -2.82904 | -2.83112 |
| H | 3.16403  | -3.76614 | -3.00278 |
| H | 2.36089  | -1.20246 | -2.17409 |
| H | -1.99274 | 1.7734   | -3.04008 |
| O | -0.43404 | -1.19537 | -0.9721  |

$$\Delta E_{\text{solv}} = -2315.24293582$$

$$\Delta G_{\text{correction}} = 0.471013$$

**<sup>2</sup>c4**

Charge = 0 Multiplicity = 2

|    |          |          |          |
|----|----------|----------|----------|
| C  | 1.86944  | -2.55809 | 1.23565  |
| N  | 1.99478  | -1.44151 | 0.45437  |
| C  | 2.78163  | -1.80613 | -0.60431 |
| C  | 3.16247  | -3.18399 | -0.485   |
| C  | 2.60251  | -3.64914 | 0.6615   |
| Fe | 1.03588  | 0.33533  | 0.7014   |
| O  | -0.19069 | -0.19034 | -0.27257 |
| C  | 3.14854  | -0.97211 | -1.6495  |
| C  | 2.81285  | 0.36335  | -1.78346 |
| N  | 2.03627  | 1.07509  | -0.90211 |
| C  | 1.93744  | 2.33667  | -1.42267 |
| C  | 2.67863  | 2.43002  | -2.64606 |
| C  | 3.21821  | 1.2053   | -2.87189 |
| C  | 1.18624  | 3.36003  | -0.86971 |
| C  | 0.39138  | 3.26188  | 0.26219  |
| N  | 0.23922  | 2.13638  | 1.0266   |
| C  | -0.66975 | 2.4632   | 1.99752  |
| C  | -1.09442 | 3.82328  | 1.84306  |
| C  | -0.43041 | 4.32109  | 0.76737  |
| C  | -1.10819 | 1.60662  | 2.99498  |
| C  | -0.69005 | 0.29847  | 3.18055  |
| N  | 0.21436  | -0.35449 | 2.38909  |
| C  | 0.34703  | -1.60331 | 2.92648  |
| C  | -0.47888 | -1.7363  | 4.08964  |
| C  | -1.13102 | -0.55655 | 4.24351  |
| C  | 1.12439  | -2.62392 | 2.40088  |
| S  | 3.1217   | 0.92251  | 1.8247   |
| H  | 3.20627  | 2.20243  | 1.40613  |
| H  | -1.84754 | -0.27415 | 5.00544  |
| H  | -0.55451 | -2.6339  | 4.69097  |
| H  | 1.11038  | -3.57482 | 2.92748  |
| H  | 2.66611  | -4.64234 | 1.08938  |
| H  | 3.78721  | -3.7136  | -1.1945  |
| H  | 3.75819  | -1.40862 | -2.43691 |
| H  | 3.83718  | 0.88337  | -3.70076 |
| H  | 2.74626  | 3.32269  | -3.25561 |
| H  | 1.17122  | 4.30625  | -1.40217 |
| H  | -0.49266 | 5.31064  | 0.33121  |
| H  | -1.80674 | 4.32377  | 2.48828  |
| H  | -1.83878 | 1.99838  | 3.69899  |
| H  | -1.26385 | -1.52421 | 0.4309   |
| C  | -2.17857 | -0.58547 | -2.8068  |
| C  | -3.03258 | -0.56065 | -1.7631  |
| C  | -1.22427 | 0.50974  | -3.10081 |
| H  | -2.18979 | -1.44198 | -3.48376 |
| C  | -3.01327 | 0.59529  | -0.86701 |

|   |          |          |          |
|---|----------|----------|----------|
| C | -4.06203 | -1.65237 | -1.57355 |
| C | -0.08689 | -2.82497 | -2.01641 |
| C | -1.44801 | 1.80163  | -2.34603 |
| H | -0.20494 | 0.19118  | -2.8192  |
| C | -3.79362 | 0.52419  | 0.4101   |
| C | -2.28674 | 1.70679  | -1.16945 |
| C | -4.70504 | -1.70796 | -0.19299 |
| H | -3.61341 | -2.62049 | -1.82767 |
| H | -4.85129 | -1.4904  | -2.3241  |
| O | -0.7735  | -3.74063 | -1.63554 |
| O | -0.90179 | 2.84226  | -2.69965 |
| C | -5.0596  | -0.31441 | 0.29971  |
| H | -3.13269 | 0.05316  | 1.15699  |
| H | -3.99319 | 1.53604  | 0.78285  |
| H | -2.33282 | 2.58687  | -0.52807 |
| H | -5.59369 | -2.34878 | -0.22911 |
| H | -4.00115 | -2.16296 | 0.511    |
| H | -5.77103 | 0.17018  | -0.38587 |
| H | -5.55889 | -0.36258 | 1.27402  |
| H | -1.53587 | -2.99588 | 0.10032  |
| O | 0.58499  | -2.82544 | -3.17721 |
| H | 0.4039   | -3.67584 | -3.60953 |
| H | 0.07241  | -1.87392 | -1.47877 |
| H | -1.15416 | 0.71846  | -4.17545 |
| O | -1.70641 | -2.32071 | 0.77046  |

$$\Delta E_{\text{solv}} = -2315.32715949$$

$$\Delta G_{\text{correction}} = 0.469862$$



**<sup>4</sup>c1**

Charge = 0 Multiplicity = 4

|    |          |          |          |
|----|----------|----------|----------|
| C  | -0.68322 | -0.30685 | 1.91168  |
| N  | 0.35518  | -0.9182  | 1.24506  |
| C  | 0.14797  | -2.26596 | 1.38995  |
| C  | -1.05928 | -2.50742 | 2.11963  |
| C  | -1.56342 | -1.29219 | 2.46037  |
| Fe | 1.92009  | -0.02181 | 0.39167  |
| O  | 0.84192  | -0.14599 | -1.37652 |
| C  | 1.02632  | -3.25195 | 0.97022  |
| C  | 2.26831  | -3.01977 | 0.4103   |
| N  | 2.77808  | -1.77699 | 0.10573  |
| C  | 4.03438  | -2.01167 | -0.41122 |
| C  | 4.32078  | -3.41438 | -0.40216 |
| C  | 3.22036  | -4.03972 | 0.08852  |
| C  | 4.85791  | -1.04729 | -0.95873 |
| C  | 4.51209  | 0.28293  | -1.13301 |
| N  | 3.33323  | 0.84441  | -0.71865 |
| C  | 3.38057  | 2.15774  | -1.12239 |
| C  | 4.59888  | 2.41133  | -1.82992 |
| C  | 5.30918  | 1.25293  | -1.82036 |
| C  | 2.43083  | 3.11852  | -0.82805 |
| C  | 1.32696  | 2.93134  | -0.00938 |
| N  | 0.98736  | 1.74746  | 0.58724  |
| C  | -0.14041 | 2.01258  | 1.32036  |
| C  | -0.5033  | 3.39623  | 1.20374  |
| C  | 0.4011   | 3.96126  | 0.36166  |
| C  | -0.89612 | 1.05842  | 1.98211  |
| S  | 2.98557  | 0.31464  | 2.2883   |
| H  | 2.65308  | 1.59967  | 2.5335   |
| H  | 0.44825  | 4.9862   | 0.01312  |
| H  | -1.37718 | 3.83744  | 1.66815  |
| H  | -1.764   | 1.40817  | 2.53483  |
| H  | -2.46206 | -1.06603 | 3.0215   |
| H  | -1.45406 | -3.48982 | 2.35001  |
| H  | 0.74479  | -4.28549 | 1.15497  |
| H  | 3.05534  | -5.10115 | 0.23056  |
| H  | 5.24508  | -3.85511 | -0.75614 |
| H  | 5.8251   | -1.36852 | -1.33638 |
| H  | 6.28496  | 1.05663  | -2.24843 |
| H  | 4.8732   | 3.36747  | -2.25935 |
| H  | 2.59121  | 4.1164   | -1.22842 |
| H  | -1.93045 | 1.3307   | -0.93502 |
| C  | -2.96735 | 1.32764  | -1.3041  |
| C  | -3.56327 | -0.08153 | -1.09799 |
| C  | -3.7079  | 2.44587  | -0.59356 |
| H  | -2.8982  | 1.52973  | -2.37883 |
| C  | -4.12333 | -0.25047 | 0.29805  |

|   |          |          |          |
|---|----------|----------|----------|
| C | -4.71639 | -0.33544 | -2.09737 |
| C | -2.36446 | -1.03062 | -1.37997 |
| C | -3.81687 | 2.14874  | 0.88153  |
| H | -3.21584 | 3.41223  | -0.73776 |
| C | -4.81071 | -1.54515 | 0.59686  |
| C | -4.16832 | 0.76468  | 1.18705  |
| C | -5.52763 | -1.59888 | -1.82675 |
| H | -4.2912  | -0.35566 | -3.10691 |
| H | -5.38427 | 0.53832  | -2.05925 |
| O | -1.90532 | -0.8592  | -2.70105 |
| O | -3.6803  | 2.99836  | 1.75095  |
| C | -5.98833 | -1.69208 | -0.37897 |
| H | -4.12954 | -2.39115 | 0.47101  |
| H | -5.16842 | -1.54916 | 1.63312  |
| H | -4.55783 | 0.58894  | 2.19154  |
| H | -6.39616 | -1.61969 | -2.49676 |
| H | -4.92402 | -2.47601 | -2.07383 |
| H | -6.71951 | -0.89796 | -0.16738 |
| H | -6.50571 | -2.64133 | -0.19654 |
| H | -1.18638 | -0.21278 | -2.70095 |
| O | -2.71981 | -2.37456 | -1.24528 |
| H | -1.97928 | -2.87542 | -1.6069  |
| H | -1.55122 | -0.77479 | -0.67414 |
| H | -4.72906 | 2.55116  | -0.98881 |
| O | 0.41639  | 0.80891  | -2.06699 |

$$\Delta E_{\text{solv}} = -2315.24285579$$

$$\Delta G_{\text{correction}} = 0.480932$$

**<sup>4</sup>c1-ts**

Charge = 0 Multiplicity = 4

|    |          |          |          |
|----|----------|----------|----------|
| C  | -0.63012 | -0.54486 | 2.10555  |
| N  | 0.42794  | -1.04202 | 1.38135  |
| C  | 0.36359  | -2.40049 | 1.50051  |
| C  | -0.78214 | -2.77616 | 2.27564  |
| C  | -1.38703 | -1.62409 | 2.66654  |
| Fe | 1.81639  | 0.01429  | 0.38763  |
| O  | 0.6634   | -0.31647 | -1.11636 |
| C  | 1.32372  | -3.28454 | 1.02771  |
| C  | 2.50057  | -2.92452 | 0.40117  |
| N  | 2.86022  | -1.63867 | 0.06226  |
| C  | 4.08733  | -1.74142 | -0.54613 |
| C  | 4.52015  | -3.10707 | -0.55882 |
| C  | 3.53051  | -3.8406  | 0.01161  |
| C  | 4.75759  | -0.69481 | -1.15405 |
| C  | 4.26351  | 0.59188  | -1.28521 |
| N  | 3.07668  | 1.03436  | -0.76305 |
| C  | 2.96286  | 2.34768  | -1.14108 |
| C  | 4.08738  | 2.72678  | -1.94292 |
| C  | 4.90281  | 1.6429   | -2.01772 |
| C  | 1.95838  | 3.21366  | -0.74537 |
| C  | 0.94434  | 2.91288  | 0.15114  |
| N  | 0.74833  | 1.68838  | 0.72684  |
| C  | -0.32669 | 1.8319   | 1.56492  |
| C  | -0.80245 | 3.18515  | 1.53661  |
| C  | -0.02364 | 3.85013  | 0.64207  |
| C  | -0.95023 | 0.79352  | 2.24113  |
| S  | 2.99648  | 0.38783  | 2.23885  |
| H  | 2.32494  | 1.45304  | 2.72365  |
| H  | -0.08653 | 4.88759  | 0.33528  |
| H  | -1.66051 | 3.53971  | 2.09539  |
| H  | -1.80902 | 1.04873  | 2.85641  |
| H  | -2.27493 | -1.49755 | 3.27441  |
| H  | -1.06434 | -3.79722 | 2.50289  |
| H  | 1.1605   | -4.34324 | 1.21168  |
| H  | 3.48841  | -4.91246 | 0.16427  |
| H  | 5.45711  | -3.45097 | -0.98033 |
| H  | 5.71839  | -0.91289 | -1.6128  |
| H  | 5.85295  | 1.54677  | -2.52937 |
| H  | 4.23212  | 3.71093  | -2.37229 |
| H  | 1.99953  | 4.23024  | -1.12811 |
| H  | -1.94182 | 1.51258  | -0.70151 |
| C  | -2.97815 | 1.48788  | -1.06732 |
| C  | -3.43392 | 0.02157  | -1.16692 |
| C  | -3.82568 | 2.34667  | -0.14553 |
| H  | -2.93514 | 1.91291  | -2.07457 |
| C  | -3.95783 | -0.50809 | 0.14282  |

|   |          |          |          |
|---|----------|----------|----------|
| C | -4.54497 | -0.14685 | -2.22747 |
| C | -2.11841 | -0.73422 | -1.66823 |
| C | -3.91031 | 1.73072  | 1.22853  |
| H | -3.43158 | 3.3643   | -0.06668 |
| C | -4.49248 | -1.90556 | 0.14583  |
| C | -4.10733 | 0.28306  | 1.2279   |
| C | -5.191   | -1.52697 | -2.25747 |
| H | -4.12472 | 0.11401  | -3.20565 |
| H | -5.31724 | 0.60685  | -2.00857 |
| O | -1.66398 | -0.20113 | -2.78535 |
| O | -3.87302 | 2.38534  | 2.26161  |
| C | -5.63747 | -1.98356 | -0.87536 |
| H | -3.71526 | -2.62462 | -0.12658 |
| H | -4.85383 | -2.16497 | 1.14746  |
| H | -4.47084 | -0.14359 | 2.16427  |
| H | -6.04827 | -1.51111 | -2.94199 |
| H | -4.48313 | -2.25278 | -2.66824 |
| H | -6.4648  | -1.3492  | -0.52474 |
| H | -6.03178 | -3.00575 | -0.91451 |
| H | -0.35233 | 0.26162  | -2.58381 |
| O | -2.29562 | -2.13934 | -1.74205 |
| H | -1.86186 | -2.3912  | -2.56733 |
| H | -1.37189 | -0.57205 | -0.83372 |
| H | -4.85216 | 2.43826  | -0.53126 |
| O | 0.58655  | 0.53355  | -2.15236 |

$$\Delta E_{\text{solv}} = -2315.19015601$$

$$\Delta G_{\text{correction}} = 0.476485$$

**<sup>4</sup>c2**

Charge = 0 Multiplicity = 4

|    |          |          |          |
|----|----------|----------|----------|
| C  | 0.75354  | 0.6983   | 1.81668  |
| N  | -0.38815 | 1.138    | 1.20287  |
| C  | -0.38843 | 2.50271  | 1.34381  |
| C  | 0.79265  | 2.92694  | 2.03548  |
| C  | 1.49885  | 1.80596  | 2.33372  |
| Fe | -1.82155 | 0.01348  | 0.33562  |
| O  | -0.84032 | 0.24292  | -1.23686 |
| C  | -1.39886 | 3.34705  | 0.92054  |
| C  | -2.57165 | 2.95418  | 0.2948   |
| N  | -2.90604 | 1.6661   | -0.02774 |
| C  | -4.11792 | 1.7388   | -0.66149 |
| C  | -4.56373 | 3.09799  | -0.72336 |
| C  | -3.60092 | 3.85358  | -0.13323 |
| C  | -4.80175 | 0.65953  | -1.19729 |
| C  | -4.36177 | -0.6516  | -1.18345 |
| N  | -3.19349 | -1.08793 | -0.61629 |
| C  | -3.15911 | -2.43969 | -0.81611 |
| C  | -4.32423 | -2.86424 | -1.53343 |
| C  | -5.07334 | -1.75433 | -1.75844 |
| C  | -2.15566 | -3.2916  | -0.38173 |
| C  | -1.03567 | -2.91472 | 0.33389  |
| N  | -0.74144 | -1.63135 | 0.72512  |
| C  | 0.43801  | -1.71142 | 1.41159  |
| C  | 0.89567  | -3.06971 | 1.47036  |
| C  | -0.01729 | -3.81373 | 0.79218  |
| C  | 1.14168  | -0.62848 | 1.92695  |
| S  | -2.89924 | -0.20455 | 2.30502  |
| H  | -1.95602 | -0.89132 | 2.98242  |
| H  | -0.01434 | -4.88174 | 0.60984  |
| H  | 1.81926  | -3.3764  | 1.94972  |
| H  | 2.05638  | -0.84655 | 2.47148  |
| H  | 2.44526  | 1.71666  | 2.85413  |
| H  | 1.03338  | 3.95811  | 2.26516  |
| H  | -1.26762 | 4.41018  | 1.10516  |
| H  | -3.57522 | 4.92805  | 0.00344  |
| H  | -5.49388 | 3.42135  | -1.17496 |
| H  | -5.75438 | 0.86174  | -1.67992 |
| H  | -6.02485 | -1.673   | -2.27002 |
| H  | -4.53177 | -3.8887  | -1.8182  |
| H  | -2.26347 | -4.34717 | -0.61742 |
| H  | 4.05752  | -1.96011 | -2.27768 |
| C  | 4.41221  | -1.50534 | -1.34757 |
| C  | 3.88025  | -0.07354 | -1.2562  |
| C  | 4.03102  | -2.35615 | -0.15195 |
| H  | 5.50627  | -1.44333 | -1.42098 |
| C  | 4.32448  | 0.55745  | 0.04218  |

|   |          |          |          |
|---|----------|----------|----------|
| C | 4.33111  | 0.71083  | -2.50311 |
| C | 2.28533  | -0.1515  | -1.22882 |
| C | 4.22163  | -1.65193 | 1.17363  |
| H | 2.97732  | -2.66399 | -0.21398 |
| C | 4.44902  | 2.04707  | 0.11508  |
| C | 4.50319  | -0.21767 | 1.13642  |
| C | 4.32233  | 2.22546  | -2.37409 |
| H | 3.72506  | 0.37807  | -3.35388 |
| H | 5.35979  | 0.38899  | -2.72556 |
| O | 1.77406  | -0.91661 | -2.15683 |
| O | 4.08869  | -2.25051 | 2.23489  |
| C | 5.08104  | 2.65958  | -1.13074 |
| H | 3.43015  | 2.449    | 0.21725  |
| H | 4.98856  | 2.32913  | 1.02734  |
| H | 4.77233  | 0.23351  | 2.09285  |
| H | 4.77076  | 2.66739  | -3.27219 |
| H | 3.29206  | 2.59111  | -2.32376 |
| H | 6.13355  | 2.34839  | -1.20555 |
| H | 5.09265  | 3.75155  | -1.03887 |
| H | 0.07854  | -0.87691 | -2.38785 |
| O | 1.794    | 1.15985  | -1.11188 |
| H | 0.82665  | 1.10142  | -1.23174 |
| H | 2.07344  | -0.65887 | -0.23736 |
| H | 4.59351  | -3.29586 | -0.11779 |
| O | -0.88506 | -0.80327 | -2.1547  |

$$\Delta E_{\text{solv}} = -2315.21308762$$

$$\Delta G_{\text{correction}} = 0.479806$$

**<sup>4</sup>c2-ts**

Charge = 0 Multiplicity = 4

|    |          |          |          |
|----|----------|----------|----------|
| C  | 0.71681  | 0.73646  | 1.85889  |
| N  | -0.40281 | 1.1603   | 1.19312  |
| C  | -0.40957 | 2.52699  | 1.29846  |
| C  | 0.75204  | 2.97172  | 2.01063  |
| C  | 1.44434  | 1.85949  | 2.36847  |
| Fe | -1.81961 | 0.01421  | 0.32832  |
| O  | -0.84587 | 0.24859  | -1.25346 |
| C  | -1.42255 | 3.3564   | 0.85039  |
| C  | -2.60145 | 2.93935  | 0.25392  |
| N  | -2.93296 | 1.64032  | -0.02932 |
| C  | -4.16236 | 1.68586  | -0.63378 |
| C  | -4.62347 | 3.03913  | -0.71115 |
| C  | -3.65113 | 3.81767  | -0.1685  |
| C  | -4.83896 | 0.59172  | -1.14592 |
| C  | -4.36417 | -0.70783 | -1.15159 |
| N  | -3.17116 | -1.11515 | -0.61765 |
| C  | -3.09691 | -2.46279 | -0.83887 |
| C  | -4.26267 | -2.91224 | -1.54043 |
| C  | -5.05324 | -1.82443 | -1.72784 |
| C  | -2.06686 | -3.29048 | -0.42474 |
| C  | -0.96497 | -2.89506 | 0.31204  |
| N  | -0.7143  | -1.61341 | 0.7335   |
| C  | 0.44276  | -1.67597 | 1.46192  |
| C  | 0.92899  | -3.02383 | 1.51312  |
| C  | 0.06068  | -3.77668 | 0.78627  |
| C  | 1.10816  | -0.58456 | 2.00705  |
| S  | -2.89942 | -0.21414 | 2.29899  |
| H  | -2.03701 | -1.04709 | 2.91717  |
| H  | 0.09647  | -4.84088 | 0.58559  |
| H  | 1.84072  | -3.32031 | 2.02066  |
| H  | 2.01082  | -0.78794 | 2.578    |
| H  | 2.36989  | 1.78716  | 2.92789  |
| H  | 0.98449  | 4.00906  | 2.22065  |
| H  | -1.29675 | 4.4246   | 1.00725  |
| H  | -3.63268 | 4.89541  | -0.05841 |
| H  | -5.56896 | 3.34341  | -1.14392 |
| H  | -5.80752 | 0.77265  | -1.60457 |
| H  | -6.01846 | -1.76617 | -2.21646 |
| H  | -4.44377 | -3.93831 | -1.83751 |
| H  | -2.14282 | -4.34453 | -0.679   |
| H  | 4.04983  | -1.9884  | -2.23021 |
| C  | 4.4592   | -1.52435 | -1.32736 |
| C  | 4.00662  | -0.07966 | -1.25914 |
| C  | 4.09699  | -2.33167 | -0.09399 |
| H  | 5.55231  | -1.5083  | -1.453   |
| C  | 4.38497  | 0.5919   | -0.00353 |

|   |         |          |          |
|---|---------|----------|----------|
| C | 4.28599 | 0.67105  | -2.55109 |
| C | 2.17769 | -0.21832 | -1.12959 |
| C | 4.27256 | -1.58096 | 1.20923  |
| H | 3.04837 | -2.6579  | -0.14547 |
| C | 4.47988 | 2.08713  | 0.02667  |
| C | 4.53565 | -0.14659 | 1.13084  |
| C | 4.24223 | 2.18802  | -2.4568  |
| H | 3.61243 | 0.29481  | -3.32939 |
| H | 5.29658 | 0.36639  | -2.87041 |
| O | 1.73484 | -0.95437 | -2.05139 |
| O | 4.14421 | -2.14857 | 2.28823  |
| C | 5.04297 | 2.67725  | -1.26086 |
| H | 3.45981 | 2.47203  | 0.17179  |
| H | 5.05491 | 2.40065  | 0.90607  |
| H | 4.77501 | 0.34107  | 2.07666  |
| H | 4.6302  | 2.62006  | -3.38671 |
| H | 3.20458 | 2.52374  | -2.36398 |
| H | 6.09878 | 2.38951  | -1.37273 |
| H | 5.03093 | 3.77135  | -1.20345 |
| H | 0.01856 | -0.90181 | -2.41379 |
| O | 1.75899 | 1.10103  | -1.01352 |
| H | 0.8264  | 1.11304  | -1.30761 |
| H | 2.21272 | -0.67147 | -0.1142  |
| H | 4.6735  | -3.26079 | -0.02855 |
| O | -0.9386 | -0.76754 | -2.20819 |

$$\Delta E_{\text{solv}} = -2315.19433451$$

$$\Delta G_{\text{correction}} = 0.477572$$



**<sup>4</sup>c3**

Charge = 0 Multiplicity = 4

|    |          |          |          |
|----|----------|----------|----------|
| C  | 0.63567  | 0.70918  | 1.61721  |
| N  | -0.51382 | 1.17189  | 1.02662  |
| C  | -0.47797 | 2.53656  | 1.14215  |
| C  | 0.73296  | 2.94371  | 1.78923  |
| C  | 1.41777  | 1.81     | 2.09347  |
| Fe | -2.02679 | 0.06126  | 0.27423  |
| O  | -1.11468 | 0.2181   | -1.37073 |
| C  | -1.48196 | 3.39876  | 0.73619  |
| C  | -2.6877  | 3.01572  | 0.17825  |
| N  | -3.07484 | 1.7238   | -0.08299 |
| C  | -4.32176 | 1.81017  | -0.65068 |
| C  | -4.72957 | 3.17913  | -0.73525 |
| C  | -3.71547 | 3.92613  | -0.22614 |
| C  | -5.07169 | 0.73918  | -1.10121 |
| C  | -4.66783 | -0.58327 | -1.06382 |
| N  | -3.47658 | -1.03219 | -0.56208 |
| C  | -3.48916 | -2.39446 | -0.71605 |
| C  | -4.71285 | -2.80721 | -1.33639 |
| C  | -5.44568 | -1.68471 | -1.54932 |
| C  | -2.48205 | -3.25784 | -0.33018 |
| C  | -1.3031  | -2.88443 | 0.29271  |
| N  | -0.95985 | -1.60277 | 0.63515  |
| C  | 0.26362  | -1.69043 | 1.24928  |
| C  | 0.69891  | -3.0549  | 1.29817  |
| C  | -0.27112 | -3.79253 | 0.69565  |
| C  | 0.99746  | -0.62155 | 1.73506  |
| S  | -2.97862 | -0.08789 | 2.32511  |
| H  | -2.00143 | -0.77431 | 2.95211  |
| H  | -0.29944 | -4.86341 | 0.53223  |
| H  | 1.64544  | -3.37112 | 1.72242  |
| H  | 1.92664  | -0.85705 | 2.24549  |
| H  | 2.36946  | 1.7112   | 2.60221  |
| H  | 1.0038   | 3.97259  | 1.99489  |
| H  | -1.31799 | 4.46255  | 0.88614  |
| H  | -3.65389 | 5.00352  | -0.12837 |
| H  | -5.67487 | 3.51389  | -1.14553 |
| H  | -6.04677 | 0.95493  | -1.5295  |
| H  | -6.42737 | -1.59272 | -1.99853 |
| H  | -4.96603 | -3.83429 | -1.57081 |
| H  | -2.63004 | -4.31689 | -0.52406 |
| H  | 5.33978  | -1.96526 | -2.05508 |
| C  | 5.42556  | -1.64561 | -1.00867 |
| C  | 5.33465  | -0.15379 | -0.92122 |
| C  | 4.39962  | -2.37298 | -0.14761 |
| H  | 6.4446   | -1.94403 | -0.70793 |
| C  | 4.8869   | 0.44367  | 0.25421  |

|   |          |          |          |
|---|----------|----------|----------|
| C | 5.83696  | 0.64533  | -2.08061 |
| C | 2.03554  | -0.03177 | -1.84714 |
| C | 4.21708  | -1.7675  | 1.22442  |
| H | 3.41333  | -2.32725 | -0.63438 |
| C | 4.84893  | 1.94464  | 0.39044  |
| C | 4.45729  | -0.34684 | 1.3255   |
| C | 5.4958   | 2.12761  | -2.00656 |
| H | 5.46482  | 0.20296  | -3.01672 |
| H | 6.93161  | 0.51317  | -2.14405 |
| O | 1.56813  | -1.15116 | -1.90279 |
| O | 3.7904   | -2.42489 | 2.17302  |
| C | 5.74527  | 2.66226  | -0.60586 |
| H | 3.80663  | 2.27174  | 0.24884  |
| H | 5.09793  | 2.22252  | 1.42223  |
| H | 4.23629  | 0.11333  | 2.28859  |
| H | 6.07044  | 2.68423  | -2.75451 |
| H | 4.43725  | 2.27685  | -2.26433 |
| H | 6.8003   | 2.51092  | -0.33631 |
| H | 5.57063  | 3.74256  | -0.56212 |
| H | -0.24924 | -1.24489 | -2.14053 |
| O | 1.38795  | 1.09024  | -1.63956 |
| H | 0.41482  | 0.88634  | -1.50135 |
| H | 3.11338  | 0.16365  | -1.97052 |
| H | 4.63136  | -3.43647 | -0.04197 |
| O | -1.17598 | -0.92033 | -2.19601 |

$$\Delta E_{\text{solv}} = -2315.26668346$$

$$\Delta G_{\text{correction}} = 0.473576$$

**<sup>4</sup>c3-ts**

Charge = 0 Multiplicity = 4

|    |          |          |          |
|----|----------|----------|----------|
| C  | -1.94331 | 0.17248  | 2.3079   |
| N  | -0.67665 | -0.28358 | 2.04305  |
| C  | -0.53086 | -1.44207 | 2.76566  |
| C  | -1.72048 | -1.70483 | 3.51773  |
| C  | -2.59947 | -0.70743 | 3.22723  |
| Fe | 0.72514  | 0.63674  | 0.94936  |
| O  | -0.09861 | -0.40617 | -0.89271 |
| C  | 0.55876  | -2.2979  | 2.69282  |
| C  | 1.69717  | -2.08739 | 1.93143  |
| N  | 1.93615  | -0.97452 | 1.16718  |
| C  | 3.21573  | -1.11076 | 0.69546  |
| C  | 3.77089  | -2.36246 | 1.122    |
| C  | 2.82727  | -2.97007 | 1.88809  |
| C  | 3.88725  | -0.16736 | -0.06728 |
| C  | 3.35862  | 1.03772  | -0.50861 |
| N  | 2.08383  | 1.47901  | -0.26453 |
| C  | 1.96373  | 2.68017  | -0.91701 |
| C  | 3.18855  | 2.99612  | -1.58978 |
| C  | 4.05445  | 1.97892  | -1.33493 |
| C  | 0.81906  | 3.46202  | -0.96032 |
| C  | -0.38306 | 3.16782  | -0.33674 |
| N  | -0.60378 | 2.08801  | 0.4698   |
| C  | -1.91126 | 2.16731  | 0.86055  |
| C  | -2.53952 | 3.31816  | 0.27095  |
| C  | -1.58586 | 3.94442  | -0.46609 |
| C  | -2.53183 | 1.29236  | 1.73755  |
| S  | 1.63614  | 1.82706  | 2.84127  |
| H  | 0.53665  | 1.81753  | 3.6226   |
| H  | -1.67563 | 4.85211  | -1.05185 |
| H  | -3.58035 | 3.58649  | 0.40682  |
| H  | -3.57443 | 1.48645  | 1.97694  |
| H  | -3.60849 | -0.56777 | 3.59844  |
| H  | -1.86089 | -2.55758 | 4.17192  |
| H  | 0.51922  | -3.20479 | 3.29145  |
| H  | 2.88836  | -3.9216  | 2.40336  |
| H  | 4.7651   | -2.71414 | 0.87187  |
| H  | 4.91067  | -0.39672 | -0.3542  |
| H  | 5.0792   | 1.86718  | -1.67024 |
| H  | 3.35545  | 3.89017  | -2.17916 |
| H  | 0.86798  | 4.37914  | -1.54243 |
| H  | -1.21977 | 0.2953   | -2.42247 |
| C  | -2.43621 | -0.2615  | -2.82471 |
| C  | -2.1703  | -1.42276 | -2.1151  |
| C  | -3.49819 | 0.70611  | -2.37493 |
| H  | -2.20935 | -0.2835  | -3.89501 |
| C  | -2.76568 | -1.64276 | -0.80977 |

|   |          |          |          |
|---|----------|----------|----------|
| C | -1.30291 | -2.48213 | -2.73016 |
| C | 2.30825  | -1.28622 | -2.54769 |
| C | -4.15605 | 0.40531  | -1.04195 |
| H | -3.11876 | 1.73662  | -2.3146  |
| C | -2.27091 | -2.77788 | 0.03692  |
| C | -3.73606 | -0.80602 | -0.35524 |
| C | -0.65478 | -3.43235 | -1.73506 |
| H | -0.55881 | -2.00593 | -3.38132 |
| H | -1.94311 | -3.06399 | -3.41434 |
| O | 1.83478  | -0.45866 | -3.30058 |
| O | -4.98079 | 1.17096  | -0.56384 |
| C | -1.69097 | -3.94394 | -0.74856 |
| H | -1.47376 | -2.36303 | 0.66766  |
| H | -3.05788 | -3.0978  | 0.72879  |
| H | -4.20481 | -0.98944 | 0.61082  |
| H | -0.1711  | -4.25804 | -2.26943 |
| H | 0.13066  | -2.90078 | -1.18289 |
| H | -2.48662 | -4.48218 | -1.28431 |
| H | -1.2452  | -4.66658 | -0.05608 |
| H | 0.54519  | 0.36156  | -2.52812 |
| O | 3.37601  | -2.01824 | -2.83927 |
| H | 3.68591  | -1.74737 | -3.71939 |
| H | 1.89837  | -1.527   | -1.55844 |
| H | -4.29827 | 0.76187  | -3.12587 |
| O | -0.18592 | 0.61519  | -1.90298 |

$$\Delta E_{\text{solv}} = -2315.2739718$$

$$\Delta G_{\text{correction}} = 0.468373$$

**4c4**

Charge = 0 Multiplicity = 4

|    |          |          |          |
|----|----------|----------|----------|
| C  | -1.71477 | 0.44598  | 2.40764  |
| N  | -0.47051 | -0.0501  | 2.11007  |
| C  | -0.29255 | -1.14452 | 2.919    |
| C  | -1.44058 | -1.32771 | 3.75594  |
| C  | -2.32206 | -0.34147 | 3.43872  |
| Fe | 0.85646  | 0.73828  | 0.83649  |
| O  | -0.05784 | -0.59663 | -0.72372 |
| C  | 0.80103  | -1.9983  | 2.88831  |
| C  | 1.91627  | -1.85216 | 2.07849  |
| N  | 2.10814  | -0.82878 | 1.18852  |
| C  | 3.3675   | -1.00125 | 0.67987  |
| C  | 3.96743  | -2.18211 | 1.23164  |
| C  | 3.06368  | -2.71425 | 2.09605  |
| C  | 3.96818  | -0.16445 | -0.24924 |
| C  | 3.37827  | 0.94579  | -0.83901 |
| N  | 2.10956  | 1.4011   | -0.58608 |
| C  | 1.92341  | 2.48827  | -1.40354 |
| C  | 3.09599  | 2.71028  | -2.19651 |
| C  | 3.99937  | 1.75701  | -1.84384 |
| C  | 0.76954  | 3.25462  | -1.47736 |
| C  | -0.37689 | 3.0637   | -0.721   |
| N  | -0.52648 | 2.10756  | 0.243    |
| C  | -1.7892  | 2.26499  | 0.74248  |
| C  | -2.46317 | 3.33888  | 0.06518  |
| C  | -1.58284 | 3.83698  | -0.8429  |
| C  | -2.334   | 1.51239  | 1.771    |
| S  | 1.86664  | 2.17731  | 2.49739  |
| H  | 0.7692   | 2.38642  | 3.25323  |
| H  | -1.72406 | 4.65877  | -1.53573 |
| H  | -3.48403 | 3.64442  | 0.26131  |
| H  | -3.35102 | 1.75083  | 2.07313  |
| H  | -3.30486 | -0.15451 | 3.85662  |
| H  | -1.5501  | -2.11983 | 4.48765  |
| H  | 0.78955  | -2.84221 | 3.57394  |
| H  | 3.16305  | -3.60002 | 2.71267  |
| H  | 4.95875  | -2.5449  | 0.98565  |
| H  | 4.98157  | -0.40995 | -0.55799 |
| H  | 5.00464  | 1.60981  | -2.2218  |
| H  | 3.20658  | 3.50566  | -2.92437 |
| H  | 0.76772  | 4.07812  | -2.1875  |
| H  | -1.13926 | -0.04596 | -2.25848 |
| C  | -2.99342 | -0.52173 | -2.66879 |
| C  | -2.6205  | -1.58515 | -1.91982 |
| C  | -3.77046 | 0.62293  | -2.11729 |
| H  | -2.77668 | -0.52397 | -3.73994 |
| C  | -2.97298 | -1.62611 | -0.49485 |

|   |          |          |          |
|---|----------|----------|----------|
| C | -1.90911 | -2.76482 | -2.53735 |
| C | 2.2067   | -1.71725 | -2.37927 |
| C | -4.31542 | 0.44423  | -0.71126 |
| H | -3.15169 | 1.53768  | -2.08556 |
| C | -2.34683 | -2.66834 | 0.38377  |
| C | -3.82174 | -0.70598 | 0.02598  |
| C | -1.08693 | -3.58788 | -1.55513 |
| H | -1.2994  | -2.42879 | -3.38659 |
| H | -2.67679 | -3.41808 | -2.98047 |
| O | 1.65003  | -1.02869 | -3.21667 |
| O | -5.07175 | 1.27109  | -0.22245 |
| C | -1.9273  | -3.93934 | -0.33861 |
| H | -1.44574 | -2.19875 | 0.804    |
| H | -2.99842 | -2.87566 | 1.23997  |
| H | -4.12616 | -0.77344 | 1.06924  |
| H | -0.7109  | -4.4894  | -2.05234 |
| H | -0.21681 | -3.00618 | -1.22744 |
| H | -2.81123 | -4.51646 | -0.64789 |
| H | -1.3672  | -4.58325 | 0.34849  |
| H | 0.4587   | -0.16069 | -2.5665  |
| O | 3.25561  | -2.47655 | -2.64729 |
| H | 3.47928  | -2.35467 | -3.58509 |
| H | 1.88817  | -1.78822 | -1.33173 |
| H | -4.59733 | 0.89825  | -2.78383 |
| O | -0.23538 | 0.23887  | -1.95463 |

$$\Delta E_{\text{solv}} = -2315.28782342$$

$$\Delta G_{\text{correction}} = 0.471799$$

## 5. Coordinates of all stationary points in Fig. 4

21

Charge = 0 Multiplicity = 2

|    |          |          |          |
|----|----------|----------|----------|
| C  | 0.06163  | -2.21771 | 1.74338  |
| N  | 1.04153  | -1.87844 | 0.85219  |
| C  | 1.54819  | -3.05865 | 0.3777   |
| C  | 0.84196  | -4.16516 | 0.95291  |
| C  | -0.07137 | -3.64238 | 1.81455  |
| Fe | 1.56489  | -0.04725 | 0.26472  |
| O  | 0.7354   | -0.07613 | -1.15596 |
| C  | 2.65556  | -3.17328 | -0.45078 |
| C  | 3.44218  | -2.12535 | -0.90427 |
| N  | 3.195    | -0.80429 | -0.65516 |
| C  | 4.1798   | -0.10475 | -1.29661 |
| C  | 5.09511  | -1.01167 | -1.92882 |
| C  | 4.63187  | -2.26581 | -1.69402 |
| C  | 4.24148  | 1.27749  | -1.39792 |
| C  | 3.3104   | 2.17205  | -0.89872 |
| N  | 2.20826  | 1.82818  | -0.15954 |
| C  | 1.50342  | 2.98789  | 0.03581  |
| C  | 2.19259  | 4.09069  | -0.57157 |
| C  | 3.31908  | 3.58741  | -1.1367  |
| C  | 0.32976  | 3.08278  | 0.76516  |
| C  | -0.27656 | 2.03981  | 1.45453  |
| N  | 0.11334  | 0.72929  | 1.40049  |
| C  | -0.70152 | 0.06232  | 2.28177  |
| C  | -1.59928 | 0.97951  | 2.91875  |
| C  | -1.35256 | 2.20412  | 2.38893  |
| C  | -0.71854 | -1.31145 | 2.45035  |
| S  | 3.13783  | 0.26871  | 2.12001  |
| H  | 2.5483   | 1.33668  | 2.69617  |
| H  | -1.86294 | 3.14166  | 2.56881  |
| H  | -2.35138 | 0.69857  | 3.64671  |
| H  | -1.44471 | -1.71965 | 3.14904  |
| H  | -0.77904 | -4.16416 | 2.44782  |
| H  | 1.04843  | -5.20729 | 0.74014  |
| H  | 2.95562  | -4.17842 | -0.73733 |
| H  | 5.05046  | -3.21099 | -2.01829 |
| H  | 5.97098  | -0.71114 | -2.49119 |
| H  | 5.07029  | 1.69329  | -1.96576 |
| H  | 4.09131  | 4.11508  | -1.68354 |
| H  | 1.84833  | 5.11761  | -0.5511  |
| H  | -0.13966 | 4.05992  | 0.84404  |
| H  | -1.29168 | 0.9097   | -1.4314  |
| C  | -2.28405 | 0.87637  | -1.90119 |
| C  | -3.11857 | -0.23454 | -1.22657 |
| C  | -2.88084 | 2.27031  | -1.82135 |

|   |          |          |          |
|---|----------|----------|----------|
| H | -2.09453 | 0.59023  | -2.94153 |
| C | -3.86929 | 0.28495  | -0.02011 |
| C | -4.13736 | -0.82987 | -2.22361 |
| C | -2.05192 | -1.28721 | -0.80818 |
| C | -3.14618 | 2.63522  | -0.38163 |
| H | -2.22014 | 3.01722  | -2.27194 |
| C | -4.81189 | -0.66675 | 0.64784  |
| C | -3.79901 | 1.57198  | 0.37984  |
| C | -5.18346 | -1.74956 | -1.60143 |
| H | -3.57624 | -1.35243 | -3.00717 |
| H | -4.64492 | 0.01196  | -2.71905 |
| O | -1.31074 | -1.72656 | -1.91313 |
| O | -2.89387 | 3.73382  | 0.09394  |
| C | -5.85141 | -1.12375 | -0.38533 |
| H | -4.27824 | -1.54418 | 1.02673  |
| H | -5.30098 | -0.17598 | 1.4975   |
| H | -4.31071 | 1.88471  | 1.29129  |
| H | -5.9398  | -2.00051 | -2.35584 |
| H | -4.71057 | -2.69111 | -1.30972 |
| H | -6.44887 | -0.25246 | -0.6924  |
| H | -6.55308 | -1.82787 | 0.07769  |
| H | -0.47605 | -1.22268 | -1.90034 |
| O | -2.63202 | -2.4168  | -0.2077  |
| H | -1.94169 | -3.09162 | -0.22425 |
| H | -1.36644 | -0.78891 | -0.10392 |
| H | -3.83696 | 2.32411  | -2.36335 |

$$\Delta E_{\text{solv}} = -2240.0900127$$

$$\Delta G_{\text{correction}} = 0.480417$$



**21-ts**

Charge = 0 Multiplicity = 2

|    |          |          |          |
|----|----------|----------|----------|
| C  | -0.07941 | -1.68245 | 1.9752   |
| N  | 0.96545  | -1.62111 | 1.09915  |
| C  | 1.36141  | -2.91535 | 0.89335  |
| C  | 0.52462  | -3.8121  | 1.63518  |
| C  | -0.36935 | -3.04475 | 2.31161  |
| Fe | 1.73547  | 0.02081  | 0.25461  |
| O  | 0.73519  | -0.1132  | -1.12513 |
| C  | 2.45305  | -3.30205 | 0.13406  |
| C  | 3.32691  | -2.4478  | -0.52171 |
| N  | 3.21416  | -1.08653 | -0.54959 |
| C  | 4.26587  | -0.63516 | -1.29806 |
| C  | 5.07121  | -1.73859 | -1.73455 |
| C  | 4.48401  | -2.86594 | -1.2579  |
| C  | 4.49928  | 0.68923  | -1.63697 |
| C  | 3.70291  | 1.76796  | -1.29495 |
| N  | 2.57175  | 1.69606  | -0.52873 |
| C  | 2.06569  | 2.96217  | -0.48157 |
| C  | 2.90159  | 3.86021  | -1.22753 |
| C  | 3.92394  | 3.11952  | -1.72461 |
| C  | 0.92799  | 3.33484  | 0.22037  |
| C  | 0.15815  | 2.50351  | 1.01527  |
| N  | 0.38853  | 1.16468  | 1.21525  |
| C  | -0.59811 | 0.73858  | 2.05427  |
| C  | -1.46021 | 1.82772  | 2.40999  |
| C  | -0.99423 | 2.92318  | 1.75712  |
| C  | -0.80695 | -0.5878  | 2.42449  |
| S  | 3.22607  | 0.32798  | 2.05613  |
| H  | 2.67153  | 1.43825  | 2.58419  |
| H  | -1.41329 | 3.92154  | 1.74495  |
| H  | -2.33432 | 1.74869  | 3.04508  |
| H  | -1.63913 | -0.78819 | 3.09537  |
| H  | -1.16558 | -3.35816 | 2.97554  |
| H  | 0.62984  | -4.89041 | 1.64154  |
| H  | 2.65722  | -4.36786 | 0.06668  |
| H  | 4.797    | -3.89545 | -1.38332 |
| H  | 5.96629  | -1.64718 | -2.33794 |
| H  | 5.37262  | 0.89377  | -2.25154 |
| H  | 4.75734  | 3.44376  | -2.33613 |
| H  | 2.72029  | 4.92241  | -1.33976 |
| H  | 0.62497  | 4.37741  | 0.15993  |
| H  | -1.60162 | 1.04717  | -0.55954 |
| C  | -2.41582 | 1.02126  | -1.29501 |
| C  | -3.26098 | -0.24725 | -1.0636  |
| C  | -3.18302 | 2.32553  | -1.18177 |
| H  | -1.91055 | 0.94128  | -2.26354 |
| C  | -4.36143 | -0.02685 | -0.05843 |

|   |          |          |          |
|---|----------|----------|----------|
| C | -3.86895 | -0.75311 | -2.38659 |
| C | -2.19117 | -1.29733 | -0.51997 |
| C | -3.90788 | 2.41343  | 0.14135  |
| H | -2.52369 | 3.19245  | -1.29308 |
| C | -5.33114 | -1.15016 | 0.14864  |
| C | -4.55641 | 1.16627  | 0.5483   |
| C | -4.89188 | -1.87052 | -2.2291  |
| H | -3.04412 | -1.06213 | -3.03904 |
| H | -4.34867 | 0.10748  | -2.87854 |
| O | -1.20217 | -1.51277 | -1.38697 |
| O | -4.02183 | 3.45122  | 0.77462  |
| C | -5.9585  | -1.52082 | -1.20176 |
| H | -4.82658 | -2.03097 | 0.55564  |
| H | -6.10476 | -0.84678 | 0.8628   |
| H | -5.33348 | 1.26848  | 1.30749  |
| H | -5.35696 | -2.07959 | -3.20056 |
| H | -4.38431 | -2.79154 | -1.92554 |
| H | -6.55713 | -0.67103 | -1.56195 |
| H | -6.65946 | -2.35334 | -1.06895 |
| H | -0.194   | -0.76312 | -1.24952 |
| O | -2.78341 | -2.5203  | -0.11856 |
| H | -2.16727 | -3.19122 | -0.43949 |
| H | -1.82026 | -0.80644 | 0.41261  |
| H | -3.93998 | 2.40819  | -1.97635 |

$$\Delta E_{\text{solv}} = -2240.07927332$$

$$\Delta G_{\text{correction}} = 0.470591$$

Charge = 0 Multiplicity = 2

|    |          |          |          |
|----|----------|----------|----------|
| C  | -0.0748  | -1.70051 | 1.8734   |
| N  | 0.95454  | -1.63711 | 0.97779  |
| C  | 1.30534  | -2.93336 | 0.7067   |
| C  | 0.44046  | -3.83269 | 1.41323  |
| C  | -0.40777 | -3.06746 | 2.14805  |
| Fe | 1.83163  | 0.02033  | 0.24459  |
| O  | 0.81136  | -0.08041 | -1.21193 |
| C  | 2.3958   | -3.32014 | -0.05153 |
| C  | 3.3309   | -2.46498 | -0.61697 |
| N  | 3.28385  | -1.10044 | -0.56361 |
| C  | 4.38892  | -0.65126 | -1.233   |
| C  | 5.16793  | -1.76283 | -1.69351 |
| C  | 4.50412  | -2.8887  | -1.32293 |
| C  | 4.67168  | 0.67757  | -1.5091  |
| C  | 3.85477  | 1.75301  | -1.20368 |
| N  | 2.67667  | 1.67425  | -0.51464 |
| C  | 2.16822  | 2.93926  | -0.4775  |
| C  | 3.04265  | 3.84254  | -1.1694  |
| C  | 4.0979   | 3.10821  | -1.60657 |
| C  | 1.01145  | 3.31583  | 0.19206  |
| C  | 0.23114  | 2.48779  | 0.97798  |
| N  | 0.45864  | 1.14855  | 1.18587  |
| C  | -0.5292  | 0.7227   | 2.02519  |
| C  | -1.38585 | 1.81728  | 2.37884  |
| C  | -0.92199 | 2.90922  | 1.71701  |
| C  | -0.75869 | -0.60521 | 2.37986  |
| S  | 3.17671  | 0.14876  | 2.1022   |
| H  | 2.5833   | 1.19777  | 2.70764  |
| H  | -1.34066 | 3.90773  | 1.69903  |
| H  | -2.25726 | 1.74153  | 3.01855  |
| H  | -1.56543 | -0.80094 | 3.08192  |
| H  | -1.2027  | -3.38393 | 2.81279  |
| H  | 0.50437  | -4.91328 | 1.3646   |
| H  | 2.56018  | -4.3873  | -0.17734 |
| H  | 4.77572  | -3.92202 | -1.50261 |
| H  | 6.09478  | -1.67784 | -2.248   |
| H  | 5.58545  | 0.88654  | -2.05957 |
| H  | 4.96618  | 3.43963  | -2.16342 |
| H  | 2.86621  | 4.90538  | -1.28372 |
| H  | 0.71385  | 4.35937  | 0.12593  |
| H  | -1.61773 | 0.87256  | -0.38391 |
| C  | -2.36602 | 0.89318  | -1.18417 |
| C  | -3.36976 | -0.25165 | -0.96553 |
| C  | -2.98568 | 2.27899  | -1.20783 |
| H  | -1.79555 | 0.7027   | -2.09894 |
| C  | -4.5187  | 0.13947  | -0.07529 |

|   |          |          |          |
|---|----------|----------|----------|
| C | -3.91391 | -0.78409 | -2.305   |
| C | -2.45995 | -1.40771 | -0.26594 |
| C | -3.81692 | 2.52844  | 0.02845  |
| H | -2.22081 | 3.05678  | -1.29693 |
| C | -5.61862 | -0.86222 | 0.10495  |
| C | -4.63527 | 1.38492  | 0.43827  |
| C | -5.06189 | -1.77718 | -2.18146 |
| H | -3.07831 | -1.21029 | -2.87214 |
| H | -4.25883 | 0.09199  | -2.87687 |
| O | -1.41907 | -1.71304 | -0.97278 |
| O | -3.87804 | 3.61114  | 0.58799  |
| C | -6.16569 | -1.2549  | -1.27344 |
| H | -5.25122 | -1.7603  | 0.6091   |
| H | -6.41234 | -0.4325  | 0.72568  |
| H | -5.46135 | 1.61761  | 1.11169  |
| H | -5.4636  | -1.99395 | -3.17893 |
| H | -4.68656 | -2.72724 | -1.7884  |
| H | -6.63847 | -0.3747  | -1.73345 |
| H | -6.95952 | -2.0021  | -1.15841 |
| H | 0.02677  | -0.66899 | -1.14542 |
| O | -3.23168 | -2.52534 | 0.1457   |
| H | -2.70454 | -3.28742 | -0.12878 |
| H | -2.16056 | -0.87993 | 0.68563  |
| H | -3.65074 | 2.39774  | -2.07673 |

$$\Delta E_{\text{solv}} = -2240.08172563$$

$$\Delta G_{\text{correction}} = 0.476213$$

**2-ts**

Charge = 0 Multiplicity = 2

|    |          |          |          |
|----|----------|----------|----------|
| C  | -6.14548 | -1.25026 | -1.45392 |
| C  | -5.685   | -0.85614 | -0.04656 |
| C  | -4.56703 | 0.13821  | -0.14318 |
| C  | -3.40428 | -0.21478 | -0.99542 |
| C  | -3.83206 | -0.7941  | -2.343   |
| C  | -4.98763 | -1.7838  | -2.28382 |
| C  | -4.6684  | 1.35559  | 0.44771  |
| C  | -3.81889 | 2.50196  | 0.11515  |
| C  | -2.93862 | 2.29361  | -1.0956  |
| C  | -2.35524 | 0.88987  | -1.1213  |
| C  | -2.46359 | -1.48111 | -0.1708  |
| O  | -3.28054 | -2.5593  | 0.19628  |
| O  | -3.894   | 3.56243  | 0.71388  |
| O  | -1.45652 | -1.75685 | -0.89278 |
| O  | 0.77283  | -0.0988  | -1.18124 |
| Fe | 1.83545  | 0.02836  | 0.2477   |
| S  | 3.22434  | 0.18148  | 2.06788  |
| N  | 0.99323  | -1.63435 | 1.01354  |
| C  | -0.02018 | -1.70233 | 1.92835  |
| C  | -0.32826 | -3.07145 | 2.22225  |
| C  | 0.51736  | -3.8317  | 1.48003  |
| C  | 1.35695  | -2.92713 | 0.74905  |
| C  | -0.69975 | -0.61226 | 2.44792  |
| C  | -0.49535 | 0.71344  | 2.07748  |
| N  | 0.47154  | 1.14735  | 1.21524  |
| C  | 0.22338  | 2.48122  | 1.00247  |
| C  | -0.91873 | 2.89412  | 1.76297  |
| C  | -1.35692 | 1.80094  | 2.44088  |
| C  | 2.43719  | -3.3077  | -0.02789 |
| C  | 3.34569  | -2.44572 | -0.62318 |
| N  | 3.28072  | -1.08036 | -0.58564 |
| C  | 4.35963  | -0.6236  | -1.29187 |
| C  | 5.14189  | -1.73017 | -1.75926 |
| C  | 4.50567  | -2.86063 | -1.35591 |
| C  | 4.61528  | 0.7049   | -1.59358 |
| C  | 3.7907   | 1.77144  | -1.27835 |
| N  | 2.6344   | 1.68429  | -0.55502 |
| C  | 2.11111  | 2.94383  | -0.5121  |
| C  | 2.95311  | 3.85127  | -1.23854 |
| C  | 4.00378  | 3.12614  | -1.7009  |
| C  | 0.97181  | 3.31293  | 0.18836  |
| H  | 2.56874  | 1.14583  | 2.74555  |
| H  | -1.34971 | 3.88751  | 1.74685  |
| H  | -2.21367 | 1.71991  | 3.09973  |
| H  | -1.4919  | -0.81248 | 3.16521  |
| H  | -1.10627 | -3.39294 | 2.90441  |

|   |          |          |          |
|---|----------|----------|----------|
| H | 0.59469  | -4.91171 | 1.43946  |
| H | 2.61418  | -4.37372 | -0.14559 |
| H | 4.78746  | -3.8922  | -1.53011 |
| H | 6.05154  | -1.63888 | -2.34067 |
| H | 5.51021  | 0.91981  | -2.1719  |
| H | 4.85109  | 3.46307  | -2.28611 |
| H | 2.76006  | 4.91088  | -1.35627 |
| H | 0.66035  | 4.35253  | 0.12358  |
| H | -1.63823 | 0.80968  | -0.297   |
| H | -1.75567 | 0.72665  | -2.02232 |
| H | -2.15045 | 3.05252  | -1.10983 |
| H | -2.95449 | -1.22846 | -2.83396 |
| H | -4.13194 | 0.06622  | -2.96465 |
| H | -5.35026 | -1.75506 | 0.48052  |
| H | -6.51334 | -0.42678 | 0.52694  |
| H | -5.50771 | 1.56998  | 1.11034  |
| H | -5.32244 | -2.0128  | -3.30252 |
| H | -4.64336 | -2.73282 | -1.85926 |
| H | -6.58152 | -0.3708  | -1.9498  |
| H | -6.94975 | -1.99191 | -1.38788 |
| H | 0.01212  | -0.71011 | -1.08428 |
| H | -2.90493 | -3.32038 | -0.26807 |
| H | -2.2772  | -0.88791 | 0.75587  |
| H | -3.56107 | 2.47571  | -1.9849  |

$$\Delta E_{\text{solv}} = -2240.08168053$$

$$\Delta G_{\text{correction}} = 0.475803$$

Charge = 0 Multiplicity = 2

|    |          |          |          |
|----|----------|----------|----------|
| C  | 0.47952  | -2.94164 | 1.75303  |
| N  | -0.4479  | -2.26671 | 1.00466  |
| C  | -1.66157 | -2.49733 | 1.58851  |
| C  | -1.49739 | -3.34118 | 2.73725  |
| C  | -0.17324 | -3.6289  | 2.82985  |
| Fe | -0.0893  | -1.10325 | -0.58874 |
| O  | -0.04522 | 0.37103  | 0.44996  |
| C  | -2.87865 | -2.03124 | 1.11533  |
| C  | -3.05923 | -1.31448 | -0.05593 |
| N  | -2.05749 | -0.88992 | -0.88712 |
| C  | -2.67118 | -0.34117 | -1.98272 |
| C  | -4.09558 | -0.4006  | -1.82472 |
| C  | -4.33609 | -0.98742 | -0.62286 |
| C  | -2.01848 | 0.24755  | -3.05322 |
| C  | -0.64785 | 0.44509  | -3.13867 |
| N  | 0.27015  | -0.00477 | -2.22861 |
| C  | 1.47783  | 0.52417  | -2.60217 |
| C  | 1.31455  | 1.32806  | -3.77812 |
| C  | 0.00198  | 1.25993  | -4.12446 |
| C  | 2.69206  | 0.25758  | -1.99152 |
| C  | 2.88378  | -0.63453 | -0.94709 |
| N  | 1.88948  | -1.30852 | -0.29371 |
| C  | 2.50293  | -2.12601 | 0.61393  |
| C  | 3.92605  | -1.97881 | 0.51669  |
| C  | 4.16256  | -1.04062 | -0.43794 |
| C  | 1.84892  | -2.91067 | 1.55098  |
| S  | -0.05417 | -3.01944 | -1.84321 |
| H  | 0.84176  | -2.62262 | -2.77083 |
| H  | 5.11377  | -0.65068 | -0.78059 |
| H  | 4.64441  | -2.5257  | 1.11677  |
| H  | 2.46467  | -3.5036  | 2.22237  |
| H  | 0.3339   | -4.2405  | 3.56666  |
| H  | -2.30614 | -3.67431 | 3.37696  |
| H  | -3.769   | -2.30001 | 1.67821  |
| H  | -5.29054 | -1.20865 | -0.15949 |
| H  | -4.81124 | -0.03062 | -2.54952 |
| H  | -2.63316 | 0.65364  | -3.85246 |
| H  | -0.50081 | 1.73643  | -4.95792 |
| H  | 2.11581  | 1.86775  | -4.26866 |
| H  | 3.57091  | 0.75386  | -2.3942  |
| C  | -1.34109 | 2.8791   | -0.6481  |
| C  | -1.57059 | 2.72406  | 0.81285  |
| C  | -0.12067 | 3.69897  | -1.03929 |
| C  | -0.55446 | 2.97952  | 1.72998  |
| C  | -2.88162 | 2.14048  | 1.21962  |
| C  | 3.23524  | 1.24922  | 1.63951  |

|   |          |         |          |
|---|----------|---------|----------|
| C | 1.05457  | 3.49023 | -0.11248 |
| H | 0.19013  | 3.49696 | -2.06857 |
| C | -0.74858 | 2.69718 | 3.19845  |
| C | 0.71708  | 3.34061 | 1.28387  |
| C | -2.85265 | 1.5029  | 2.59891  |
| H | -3.19614 | 1.4173  | 0.45398  |
| H | -3.65216 | 2.93105 | 1.18455  |
| O | 2.33468  | 0.59738 | 2.11396  |
| O | 2.21783  | 3.4914  | -0.51743 |
| C | -2.19683 | 2.44917 | 3.59189  |
| H | -0.146   | 1.80842 | 3.44188  |
| H | -0.31169 | 3.51074 | 3.79159  |
| H | 1.53029  | 3.43091 | 2.00362  |
| H | -3.866   | 1.2283  | 2.91473  |
| H | -2.27684 | 0.56853 | 2.54532  |
| H | -2.74935 | 3.4     | 3.60949  |
| H | -2.24499 | 2.05146 | 4.61172  |
| O | 4.50077  | 1.18369 | 2.06537  |
| H | 4.52799  | 0.50677 | 2.76114  |
| H | 3.13772  | 1.98943 | 0.8274   |
| H | -0.36003 | 4.77235 | -0.99264 |
| H | -1.22369 | 1.85433 | -1.02586 |
| H | -2.24927 | 3.25863 | -1.13873 |
| H | 0.712    | 0.42131 | 1.06197  |

$$\Delta E_{\text{solv}} = -2240.11268962$$

$$\Delta G_{\text{correction}} = 0.470755$$



**23-ts**

Charge = 0 Multiplicity = 2

|    |          |          |          |
|----|----------|----------|----------|
| C  | -1.76135 | -2.9573  | -0.74687 |
| N  | -2.03414 | -1.87661 | 0.0471   |
| C  | -2.70837 | -2.36424 | 1.13117  |
| C  | -2.87385 | -3.78652 | 1.01425  |
| C  | -2.28792 | -4.15455 | -0.15273 |
| Fe | -1.54615 | 0.05757  | -0.28996 |
| O  | 0.04055  | -0.25173 | 0.70643  |
| C  | -3.15826 | -1.60596 | 2.20047  |
| C  | -3.01426 | -0.23592 | 2.34022  |
| N  | -2.40741 | 0.59734  | 1.44034  |
| C  | -2.52424 | 1.85933  | 1.95067  |
| C  | -3.21001 | 1.82226  | 3.21143  |
| C  | -3.51296 | 0.52136  | 3.45321  |
| C  | -2.0622  | 3.01143  | 1.33522  |
| C  | -1.39759 | 3.05608  | 0.12042  |
| N  | -1.08061 | 1.9624   | -0.64703 |
| C  | -0.38346 | 2.45235  | -1.72571 |
| C  | -0.27239 | 3.8787   | -1.6384  |
| C  | -0.90431 | 4.25375  | -0.49546 |
| C  | 0.16762  | 1.69026  | -2.74018 |
| C  | 0.06296  | 0.31343  | -2.85937 |
| N  | -0.58069 | -0.50871 | -1.97207 |
| C  | -0.49978 | -1.77154 | -2.49847 |
| C  | 0.24031  | -1.74677 | -3.72601 |
| C  | 0.59276  | -0.4525  | -3.94892 |
| C  | -1.04964 | -2.9123  | -1.93377 |
| S  | -3.49609 | 0.20533  | -1.40163 |
| H  | -3.45939 | 1.51654  | -1.72485 |
| H  | 1.15572  | -0.03753 | -4.77655 |
| H  | 0.45121  | -2.61731 | -4.33638 |
| H  | -0.90572 | -3.84947 | -2.4659  |
| H  | -2.20602 | -5.14499 | -0.58488 |
| H  | -3.3771  | -4.41076 | 1.74335  |
| H  | -3.67809 | -2.13239 | 2.99734  |
| H  | -4.03598 | 0.09669  | 4.30215  |
| H  | -3.43057 | 2.69177  | 3.81964  |
| H  | -2.23683 | 3.95628  | 1.84399  |
| H  | -1.02346 | 5.25023  | -0.08605 |
| H  | 0.25102  | 4.49657  | -2.35829 |
| H  | 0.72996  | 2.21705  | -3.50592 |
| C  | 1.93166  | 1.38891  | 1.53211  |
| C  | 2.92292  | 0.42881  | 1.87936  |
| C  | 2.30734  | 2.45519  | 0.53413  |
| C  | 4.0318   | 0.19947  | 1.01674  |
| C  | 2.67663  | -0.43073 | 3.07912  |
| C  | 2.46231  | -1.55929 | -1.1935  |

|   |         |          |          |
|---|---------|----------|----------|
| C | 3.23456 | 1.96935  | -0.55473 |
| H | 1.43973 | 2.94686  | 0.09002  |
| C | 5.01083 | -0.90835 | 1.31471  |
| C | 4.16183 | 0.92317  | -0.15067 |
| C | 3.48552 | -1.71855 | 3.10577  |
| H | 1.59836 | -0.62875 | 3.14467  |
| H | 2.90419 | 0.16851  | 3.97658  |
| O | 2.06038 | -2.11151 | -0.19805 |
| O | 3.23274 | 2.43748  | -1.6861  |
| C | 4.93259 | -1.43035 | 2.74076  |
| H | 4.80215 | -1.73947 | 0.62256  |
| H | 6.02511 | -0.57539 | 1.06463  |
| H | 4.9433  | 0.66778  | -0.8671  |
| H | 3.40891 | -2.18916 | 4.09156  |
| H | 3.0625  | -2.43226 | 2.38676  |
| H | 5.3486  | -0.68665 | 3.43556  |
| H | 5.55563 | -2.32508 | 2.84564  |
| O | 3.45499 | -2.01641 | -1.95938 |
| H | 3.74803 | -2.85957 | -1.577   |
| H | 2.07877 | -0.61062 | -1.59942 |
| H | 2.85882 | 3.25273  | 1.06111  |
| H | 1.03872 | 0.66171  | 1.05209  |
| H | 1.34319 | 1.7498   | 2.38479  |
| H | 0.55073 | -1.03267 | 0.43357  |

$$\Delta E_{\text{solv}} = -2240.12645549$$

$$\Delta G_{\text{correction}} = 0.467005$$

Charge = 0 Multiplicity = 2

|    |          |          |          |
|----|----------|----------|----------|
| C  | -3.2411  | 0.7159   | 1.28229  |
| N  | -2.06345 | 1.35437  | 0.99232  |
| C  | -1.91832 | 2.31621  | 1.95649  |
| C  | -3.02753 | 2.28211  | 2.87155  |
| C  | -3.85235 | 1.29374  | 2.44888  |
| Fe | -0.8231  | 1.00049  | -0.54036 |
| O  | 0.29571  | -0.21032 | 0.70712  |
| C  | -0.86237 | 3.20694  | 2.04009  |
| C  | 0.19987  | 3.28947  | 1.15281  |
| N  | 0.38758  | 2.47892  | 0.06653  |
| C  | 1.52184  | 2.93357  | -0.55145 |
| C  | 2.06535  | 4.04974  | 0.16692  |
| C  | 1.24834  | 4.26524  | 1.23063  |
| C  | 2.08635  | 2.37625  | -1.68818 |
| C  | 1.60609  | 1.26217  | -2.35769 |
| N  | 0.48249  | 0.55645  | -2.00221 |
| C  | 0.39423  | -0.47486 | -2.90604 |
| C  | 1.48257  | -0.41654 | -3.84085 |
| C  | 2.23288  | 0.66412  | -3.50253 |
| C  | -0.60483 | -1.43452 | -2.92374 |
| C  | -1.69081 | -1.48891 | -2.06115 |
| N  | -1.92038 | -0.6209  | -1.02334 |
| C  | -3.13668 | -0.97946 | -0.49853 |
| C  | -3.6654  | -2.11141 | -1.1989  |
| C  | -2.76288 | -2.43433 | -2.16422 |
| C  | -3.75374 | -0.35915 | 0.57777  |
| S  | -2.01813 | 2.33592  | -1.82078 |
| H  | -1.28588 | 2.30512  | -2.95784 |
| H  | -2.81591 | -3.23104 | -2.89707 |
| H  | -4.60641 | -2.59652 | -0.96685 |
| H  | -4.71212 | -0.75958 | 0.90027  |
| H  | -4.79117 | 0.96609  | 2.87993  |
| H  | -3.14502 | 2.94226  | 3.723    |
| H  | -0.87944 | 3.92197  | 2.85929  |
| H  | 1.33062  | 5.02222  | 2.00191  |
| H  | 2.96233  | 4.58864  | -0.116   |
| H  | 2.98922  | 2.84201  | -2.07706 |
| H  | 3.13306  | 1.03651  | -3.97836 |
| H  | 1.63622  | -1.11725 | -4.65376 |
| H  | -0.55526 | -2.18948 | -3.70531 |
| C  | 2.76352  | -1.96041 | -0.80413 |
| C  | 3.18178  | -1.33494 | 0.31496  |
| C  | 1.93341  | -3.18977 | -0.78586 |
| C  | 2.75522  | -1.84482 | 1.62518  |
| C  | 4.05511  | -0.10925 | 0.2472   |
| C  | -1.59811 | -3.05931 | 1.28901  |

|   |          |          |          |
|---|----------|----------|----------|
| C | 1.51954  | -3.71097 | 0.57629  |
| H | 1.02575  | -3.05673 | -1.39628 |
| C | 2.98056  | -1.00715 | 2.85661  |
| C | 2.03332  | -2.99228 | 1.72505  |
| C | 3.81866  | 0.84421  | 1.4089   |
| H | 3.91082  | 0.3865   | -0.71939 |
| H | 5.10948  | -0.42703 | 0.26708  |
| O | -1.0514  | -2.23307 | 1.98473  |
| O | 0.73356  | -4.64626 | 0.677    |
| C | 4.019    | 0.09641  | 2.71725  |
| H | 2.00826  | -0.53979 | 3.07852  |
| H | 3.18806  | -1.65774 | 3.71407  |
| H | 1.68942  | -3.33998 | 2.69837  |
| H | 4.49262  | 1.70498  | 1.33491  |
| H | 2.7973   | 1.24781  | 1.36182  |
| H | 5.03314  | -0.32761 | 2.74479  |
| H | 3.94924  | 0.7722   | 3.57631  |
| O | -2.47551 | -3.94709 | 1.7388   |
| H | -2.5581  | -3.81077 | 2.69655  |
| H | -1.45624 | -3.18257 | 0.2061   |
| H | 2.46226  | -4.00303 | -1.30598 |
| H | 1.00819  | -0.62375 | 0.20179  |
| H | 3.04307  | -1.55505 | -1.7775  |
| H | -0.1965  | -0.92184 | 1.16664  |

$$\Delta E_{\text{solv}} = -2240.19510359$$

$$\Delta G_{\text{correction}} = 0.472679$$

Charge = 0 Multiplicity = 4

|    |          |          |          |
|----|----------|----------|----------|
| C  | 0.11164  | -2.17401 | 1.74017  |
| N  | 1.06485  | -1.85227 | 0.81343  |
| C  | 1.47158  | -3.03308 | 0.24697  |
| C  | 0.7378   | -4.12438 | 0.81748  |
| C  | -0.08937 | -3.59369 | 1.75842  |
| Fe | 1.61261  | -0.02863 | 0.22131  |
| O  | 0.70422  | -0.10344 | -1.16219 |
| C  | 2.5288   | -3.15084 | -0.64153 |
| C  | 3.37048  | -2.11595 | -1.03444 |
| N  | 3.19948  | -0.80662 | -0.69456 |
| C  | 4.28721  | -0.13544 | -1.17388 |
| C  | 5.18576  | -1.05369 | -1.81415 |
| C  | 4.60287  | -2.27927 | -1.75235 |
| C  | 4.42805  | 1.24554  | -1.16527 |
| C  | 3.4514   | 2.15143  | -0.77131 |
| N  | 2.2613   | 1.80885  | -0.19704 |
| C  | 1.53397  | 2.96218  | -0.09395 |
| C  | 2.28399  | 4.06254  | -0.62967 |
| C  | 3.48679  | 3.5649   | -1.01917 |
| C  | 0.32638  | 3.07434  | 0.58369  |
| C  | -0.2572  | 2.06394  | 1.33651  |
| N  | 0.18208  | 0.76772  | 1.36357  |
| C  | -0.60552 | 0.11748  | 2.29034  |
| C  | -1.51824 | 1.04691  | 2.88714  |
| C  | -1.32421 | 2.24477  | 2.27887  |
| C  | -0.6321  | -1.25324 | 2.46885  |
| S  | 2.87216  | 0.05126  | 2.33282  |
| H  | 2.71559  | 1.36375  | 2.60127  |
| H  | -1.86501 | 3.17316  | 2.41148  |
| H  | -2.25194 | 0.78771  | 3.6413   |
| H  | -1.35813 | -1.64914 | 3.17449  |
| H  | -0.78834 | -4.1072  | 2.40793  |
| H  | 0.86961  | -5.16546 | 0.54818  |
| H  | 2.77272  | -4.15033 | -0.99334 |
| H  | 4.97618  | -3.22208 | -2.13362 |
| H  | 6.12867  | -0.77878 | -2.27116 |
| H  | 5.3355   | 1.65433  | -1.60344 |
| H  | 4.32361  | 4.09441  | -1.45851 |
| H  | 1.9341   | 5.08704  | -0.66599 |
| H  | -0.15779 | 4.0472   | 0.60504  |
| H  | -1.32084 | 0.88333  | -1.46534 |
| C  | -2.31965 | 0.84228  | -1.92055 |
| C  | -3.15472 | -0.23606 | -1.19556 |
| C  | -2.9032  | 2.24371  | -1.88401 |
| H  | -2.14588 | 0.51747  | -2.95215 |
| C  | -3.89045 | 0.33399  | -0.00319 |

|   |          |          |          |
|---|----------|----------|----------|
| C | -4.18505 | -0.8649  | -2.1593  |
| C | -2.09017 | -1.27775 | -0.74414 |
| C | -3.14776 | 2.66133  | -0.45518 |
| H | -2.24063 | 2.96753  | -2.36825 |
| C | -4.83102 | -0.5859  | 0.71005  |
| C | -3.80536 | 1.63389  | 0.34932  |
| C | -5.23068 | -1.75319 | -1.49209 |
| H | -3.63329 | -1.42159 | -2.9259  |
| H | -4.69225 | -0.04076 | -2.68397 |
| O | -1.35527 | -1.75829 | -1.835   |
| O | -2.87289 | 3.77141  | -0.01954 |
| C | -5.88284 | -1.07688 | -0.29461 |
| H | -4.29729 | -1.45051 | 1.11746  |
| H | -5.30908 | -0.06029 | 1.54492  |
| H | -4.3041  | 1.9834   | 1.25461  |
| H | -5.99589 | -2.02805 | -2.22901 |
| H | -4.76037 | -2.68563 | -1.16881 |
| H | -6.47876 | -0.21476 | -0.62933 |
| H | -6.58356 | -1.75846 | 0.20226  |
| H | -0.52067 | -1.25268 | -1.84399 |
| O | -2.67237 | -2.3829  | -0.10201 |
| H | -1.988   | -3.06439 | -0.10741 |
| H | -1.40013 | -0.75588 | -0.05981 |
| H | -3.86494 | 2.28711  | -2.41671 |

$$\Delta E_{\text{solv}} = -2240.08868371$$

$$\Delta G_{\text{correction}} = 0.480087$$

**41-ts**

Charge = 0 Multiplicity = 4

|    |          |          |          |
|----|----------|----------|----------|
| C  | -0.04194 | -1.68573 | 1.98601  |
| N  | 0.96708  | -1.62026 | 1.07137  |
| C  | 1.30898  | -2.91534 | 0.78898  |
| C  | 0.47625  | -3.81827 | 1.53137  |
| C  | -0.35722 | -3.05387 | 2.28292  |
| Fe | 1.74968  | 0.0416   | 0.23791  |
| O  | 0.70716  | -0.13666 | -1.10896 |
| C  | 2.36302  | -3.29369 | -0.02406 |
| C  | 3.26672  | -2.4333  | -0.6348  |
| N  | 3.20616  | -1.07077 | -0.5831  |
| C  | 4.30758  | -0.61535 | -1.25045 |
| C  | 5.09311  | -1.71953 | -1.71988 |
| C  | 4.43615  | -2.85026 | -1.35265 |
| C  | 4.57677  | 0.71887  | -1.52131 |
| C  | 3.74873  | 1.78865  | -1.22156 |
| N  | 2.57188  | 1.69713  | -0.5318  |
| C  | 2.04033  | 2.95326  | -0.52075 |
| C  | 2.8948   | 3.86106  | -1.2319  |
| C  | 3.9668   | 3.14056  | -1.65016 |
| C  | 0.88806  | 3.31879  | 0.16375  |
| C  | 0.14673  | 2.49498  | 0.99274  |
| N  | 0.41501  | 1.16728  | 1.22198  |
| C  | -0.54097 | 0.73863  | 2.09796  |
| C  | -1.41394 | 1.82064  | 2.45168  |
| C  | -0.99448 | 2.90811  | 1.75485  |
| C  | -0.73874 | -0.58746 | 2.47392  |
| S  | 3.16056  | 0.18537  | 2.1207   |
| H  | 2.59721  | 1.26076  | 2.70801  |
| H  | -1.43852 | 3.89518  | 1.72623  |
| H  | -2.26707 | 1.73915  | 3.1144   |
| H  | -1.5534  | -0.78621 | 3.16641  |
| H  | -1.13195 | -3.37155 | 2.96995  |
| H  | 0.54643  | -4.89859 | 1.48916  |
| H  | 2.53209  | -4.36016 | -0.15212 |
| H  | 4.71474  | -3.88136 | -1.53368 |
| H  | 6.01887  | -1.62715 | -2.27477 |
| H  | 5.48723  | 0.93689  | -2.07451 |
| H  | 4.82946  | 3.47869  | -2.21147 |
| H  | 2.69722  | 4.91757  | -1.36712 |
| H  | 0.56554  | 4.35398  | 0.08031  |
| H  | -1.57774 | 1.00792  | -0.50259 |
| C  | -2.3627  | 0.98268  | -1.26892 |
| C  | -3.2506  | -0.25527 | -1.03265 |
| C  | -3.09541 | 2.31017  | -1.22232 |
| H  | -1.82218 | 0.86034  | -2.21374 |
| C  | -4.37874 | 0.02648  | -0.07357 |

|   |          |          |          |
|---|----------|----------|----------|
| C | -3.82725 | -0.78203 | -2.36151 |
| C | -2.23382 | -1.31406 | -0.41958 |
| C | -3.86194 | 2.45735  | 0.07173  |
| H | -2.40735 | 3.15437  | -1.33504 |
| C | -5.38353 | -1.06513 | 0.1334   |
| C | -4.56159 | 1.24231  | 0.48996  |
| C | -4.88931 | -1.86353 | -2.20889 |
| H | -2.99001 | -1.13558 | -2.97463 |
| H | -4.26204 | 0.07713  | -2.89576 |
| O | -1.21112 | -1.58211 | -1.23895 |
| O | -3.96309 | 3.51563  | 0.67273  |
| C | -5.97751 | -1.45547 | -1.22657 |
| H | -4.91502 | -1.94706 | 0.57955  |
| H | -6.17071 | -0.72236 | 0.81413  |
| H | -5.35938 | 1.38807  | 1.21981  |
| H | -5.32919 | -2.08417 | -3.1895  |
| H | -4.42003 | -2.79038 | -1.86492 |
| H | -6.5397  | -0.59948 | -1.62844 |
| H | -6.70602 | -2.26418 | -1.09465 |
| H | -0.23125 | -0.81406 | -1.16778 |
| O | -2.87281 | -2.51503 | -0.02558 |
| H | -2.24794 | -3.20419 | -0.28468 |
| H | -1.8866  | -0.81457 | 0.5167   |
| H | -3.82124 | 2.38984  | -2.04561 |

$$\Delta E_{\text{solv}} = -2240.07795074$$

$$\Delta G_{\text{correction}} = 0.471287$$



Charge = 0 Multiplicity = 4

|    |          |          |          |
|----|----------|----------|----------|
| C  | -0.07018 | -1.72087 | 1.87063  |
| N  | 0.95001  | -1.64552 | 0.9666   |
| C  | 1.29728  | -2.93747 | 0.67288  |
| C  | 0.43797  | -3.84679 | 1.37426  |
| C  | -0.40168 | -3.09172 | 2.12926  |
| Fe | 1.82445  | 0.0241   | 0.24595  |
| O  | 0.79922  | -0.08409 | -1.20554 |
| C  | 2.38336  | -3.31267 | -0.09752 |
| C  | 3.31951  | -2.45026 | -0.65043 |
| N  | 3.27743  | -1.08629 | -0.57433 |
| C  | 4.38482  | -0.62935 | -1.23343 |
| C  | 5.16181  | -1.73534 | -1.71036 |
| C  | 4.49248  | -2.86531 | -1.36184 |
| C  | 4.66633  | 0.70367  | -1.49221 |
| C  | 3.84199  | 1.77203  | -1.18304 |
| N  | 2.65961  | 1.68129  | -0.50159 |
| C  | 2.14303  | 2.94337  | -0.45925 |
| C  | 3.01428  | 3.85567  | -1.14308 |
| C  | 4.07765  | 3.13116  | -1.57701 |
| C  | 0.98579  | 3.31021  | 0.21433  |
| C  | 0.21633  | 2.47474  | 1.00311  |
| N  | 0.4547   | 1.13622  | 1.20453  |
| C  | -0.52586 | 0.69996  | 2.04865  |
| C  | -1.38582 | 1.78829  | 2.4131   |
| C  | -0.93417 | 2.88583  | 1.75168  |
| C  | -0.75024 | -0.63082 | 2.39404  |
| S  | 3.17255  | 0.1083   | 2.10387  |
| H  | 2.51893  | 1.07057  | 2.78654  |
| H  | -1.35971 | 3.8814   | 1.73909  |
| H  | -2.25166 | 1.70383  | 3.05918  |
| H  | -1.55377 | -0.83374 | 3.09771  |
| H  | -1.19017 | -3.41717 | 2.79732  |
| H  | 0.50011  | -4.92654 | 1.30892  |
| H  | 2.54586  | -4.37784 | -0.24144 |
| H  | 4.76094  | -3.8962  | -1.55917 |
| H  | 6.0902   | -1.64407 | -2.26124 |
| H  | 5.58184  | 0.92156  | -2.0363  |
| H  | 4.94703  | 3.47171  | -2.12654 |
| H  | 2.83115  | 4.91784  | -1.25262 |
| H  | 0.68063  | 4.35181  | 0.15271  |
| H  | -1.59585 | 0.86378  | -0.39014 |
| C  | -2.33889 | 0.87918  | -1.19556 |
| C  | -3.35328 | -0.25366 | -0.96546 |
| C  | -2.94691 | 2.26915  | -1.2426  |
| H  | -1.76436 | 0.67072  | -2.10371 |
| C  | -4.49493 | 0.15921  | -0.07523 |

|   |          |          |          |
|---|----------|----------|----------|
| C | -3.90942 | -0.78973 | -2.29855 |
| C | -2.45494 | -1.4116  | -0.26109 |
| C | -3.77654 | 2.54468  | -0.01095 |
| H | -2.17559 | 3.03906  | -1.34332 |
| C | -5.60175 | -0.83123 | 0.1223   |
| C | -4.60085 | 1.41313  | 0.41963  |
| C | -5.06799 | -1.76904 | -2.16146 |
| H | -3.08132 | -1.23028 | -2.86593 |
| H | -4.24679 | 0.08548  | -2.87608 |
| O | -1.41487 | -1.73027 | -0.96603 |
| O | -3.83098 | 3.63743  | 0.52953  |
| C | -6.16078 | -1.22971 | -1.24983 |
| H | -5.23865 | -1.72822 | 0.63153  |
| H | -6.38777 | -0.38924 | 0.7442   |
| H | -5.42266 | 1.66177  | 1.09258  |
| H | -5.47843 | -1.98727 | -3.15506 |
| H | -4.70053 | -2.72064 | -1.76496 |
| H | -6.62847 | -0.34855 | -1.71319 |
| H | -6.9606  | -1.96878 | -1.12427 |
| H | 0.02579  | -0.68845 | -1.14392 |
| O | -3.23521 | -2.52262 | 0.15391  |
| H | -2.71086 | -3.28892 | -0.11397 |
| H | -2.14988 | -0.88445 | 0.68836  |
| H | -3.60997 | 2.37968  | -2.11403 |

$$\Delta E_{\text{solv}} = -2240.080935$$

$$\Delta G_{\text{correction}} = 0.474811$$

**42-ts**

Charge = 0 Multiplicity = 4

|    |          |          |          |
|----|----------|----------|----------|
| C  | -6.14484 | -1.24444 | -1.46092 |
| C  | -5.68859 | -0.85027 | -0.05223 |
| C  | -4.5678  | 0.14121  | -0.14561 |
| C  | -3.40341 | -0.21502 | -0.99343 |
| C  | -3.82667 | -0.79556 | -2.34162 |
| C  | -4.98527 | -1.78199 | -2.28583 |
| C  | -4.66785 | 1.35914  | 0.44473  |
| C  | -3.815   | 2.5034   | 0.11353  |
| C  | -2.93096 | 2.29168  | -1.09396 |
| C  | -2.35074 | 0.8866   | -1.11549 |
| C  | -2.46714 | -1.48416 | -0.16215 |
| O  | -3.28838 | -2.56003 | 0.20122  |
| O  | -3.8901  | 3.56484  | 0.71059  |
| O  | -1.45859 | -1.76203 | -0.88115 |
| O  | 0.77304  | -0.10915 | -1.1819  |
| Fe | 1.83413  | 0.03223  | 0.24643  |
| S  | 3.22355  | 0.16746  | 2.06792  |
| N  | 0.98618  | -1.62747 | 1.01781  |
| C  | -0.02135 | -1.68982 | 1.9384   |
| C  | -0.33527 | -3.05732 | 2.23452  |
| C  | 0.50038  | -3.82221 | 1.48579  |
| C  | 1.34075  | -2.9221  | 0.74978  |
| C  | -0.69375 | -0.59485 | 2.45819  |
| C  | -0.4865  | 0.72799  | 2.08125  |
| N  | 0.47726  | 1.15578  | 1.21123  |
| C  | 0.22894  | 2.4885   | 0.99084  |
| C  | -0.90974 | 2.90701  | 1.75309  |
| C  | -1.3451  | 1.81896  | 2.44103  |
| C  | 2.41556  | -3.30816 | -0.0319  |
| C  | 3.32984  | -2.45127 | -0.62635 |
| N  | 3.27592  | -1.08578 | -0.58472 |
| C  | 4.36028  | -0.63513 | -1.28529 |
| C  | 5.13569  | -1.74604 | -1.75393 |
| C  | 4.48849  | -2.87288 | -1.3575  |
| C  | 4.62407  | 0.69279  | -1.58394 |
| C  | 3.80064  | 1.7619   | -1.27526 |
| N  | 2.63869  | 1.67951  | -0.55932 |
| C  | 2.1172   | 2.94034  | -0.52524 |
| C  | 2.965    | 3.84298  | -1.25069 |
| C  | 4.01828  | 3.11452  | -1.70179 |
| C  | 0.97678  | 3.31465  | 0.17045  |
| H  | 2.56927  | 1.12831  | 2.75195  |
| H  | -1.34055 | 3.90038  | 1.73182  |
| H  | -2.19908 | 1.74323  | 3.1041   |
| H  | -1.48396 | -0.7892  | 3.17922  |
| H  | -1.11063 | -3.3747  | 2.92162  |

|   |          |          |          |
|---|----------|----------|----------|
| H | 0.571    | -4.90264 | 1.44433  |
| H | 2.58529  | -4.37512 | -0.15185 |
| H | 4.76259  | -3.90602 | -1.53474 |
| H | 6.04804  | -1.66007 | -2.3319  |
| H | 5.52274  | 0.90439  | -2.15766 |
| H | 4.87017  | 3.44792  | -2.28235 |
| H | 2.77429  | 4.90231  | -1.37459 |
| H | 0.66645  | 4.35417  | 0.09961  |
| H | -1.63846 | 0.80521  | -0.28731 |
| H | -1.74714 | 0.72086  | -2.01335 |
| H | -2.14097 | 3.04875  | -1.1063  |
| H | -2.94812 | -1.23322 | -2.82794 |
| H | -4.12136 | 0.06437  | -2.96631 |
| H | -5.35789 | -1.74957 | 0.4768   |
| H | -6.51797 | -0.41849 | 0.51794  |
| H | -5.50855 | 1.57588  | 1.10482  |
| H | -5.31678 | -2.01119 | -3.30557 |
| H | -4.64531 | -2.73151 | -1.85893 |
| H | -6.57657 | -0.36428 | -1.9593  |
| H | -6.95136 | -1.98384 | -1.39728 |
| H | 0.01312  | -0.72106 | -1.08168 |
| H | -2.91428 | -3.32163 | -0.26349 |
| H | -2.28383 | -0.89034 | 0.76434  |
| H | -3.54979 | 2.47406  | -1.98574 |

$$\Delta E_{\text{solv}} = -2240.08152431$$

$$\Delta G_{\text{correction}} = 0.475174$$

Charge = 0 Multiplicity = 4

|    |          |          |          |
|----|----------|----------|----------|
| C  | -3.97706 | -1.38668 | -3.38321 |
| C  | -4.2727  | -1.40328 | -1.89029 |
| C  | -3.78775 | -0.16785 | -1.16953 |
| C  | -2.92227 | 0.72306  | -1.79279 |
| C  | -2.33075 | 0.46695  | -3.13801 |
| C  | -2.54034 | -0.95546 | -3.63309 |
| C  | -4.1614  | 0.03314  | 0.17036  |
| C  | -3.87874 | 1.25068  | 0.89506  |
| C  | -3.37797 | 2.39563  | 0.03819  |
| C  | -2.44283 | 1.9342   | -1.06809 |
| C  | -1.70445 | -2.40266 | 0.08118  |
| O  | -2.51621 | -3.21417 | 0.76804  |
| O  | -4.0801  | 1.37495  | 2.1023   |
| O  | -1.0378  | -2.74802 | -0.8626  |
| O  | 0.10232  | -0.09685 | -0.8062  |
| Fe | 1.43362  | 0.17212  | 0.39977  |
| S  | 3.15678  | 0.51144  | 1.85617  |
| N  | 1.95545  | -1.77048 | 0.22308  |
| C  | 1.59933  | -2.80106 | 1.0512   |
| C  | 2.22693  | -4.01538 | 0.61984  |
| C  | 2.97332  | -3.70757 | -0.47154 |
| C  | 2.82001  | -2.29986 | -0.69715 |
| C  | 0.73031  | -2.70078 | 2.12412  |
| C  | 0.05718  | -1.54965 | 2.50103  |
| N  | 0.22388  | -0.31242 | 1.93241  |
| C  | -0.72138 | 0.50106  | 2.50617  |
| C  | -1.5054  | -0.2435  | 3.44715  |
| C  | -1.00724 | -1.50738 | 3.46055  |
| C  | 3.51144  | -1.57831 | -1.65515 |
| C  | 3.48098  | -0.20124 | -1.80057 |
| N  | 2.73736  | 0.66234  | -1.04133 |
| C  | 2.98075  | 1.91698  | -1.53257 |
| C  | 3.92767  | 1.84445  | -2.60566 |
| C  | 4.23096  | 0.53148  | -2.7774  |
| C  | 2.35912  | 3.0798   | -1.10964 |
| C  | 1.36151  | 3.15125  | -0.15283 |
| N  | 0.85818  | 2.08798  | 0.54615  |
| C  | -0.10896 | 2.59367  | 1.37304  |
| C  | -0.22652 | 4.00953  | 1.17948  |
| C  | 0.6898   | 4.35636  | 0.23876  |
| C  | -0.87381 | 1.85427  | 2.25887  |
| H  | 2.47095  | 0.39314  | 3.01168  |
| H  | -2.34381 | 0.1664   | 3.99624  |
| H  | -1.34977 | -2.36112 | 4.03318  |
| H  | 0.51482  | -3.60889 | 2.6816   |
| H  | 2.10323  | -4.977   | 1.10375  |

|   |          |          |          |
|---|----------|----------|----------|
| H | 3.59658  | -4.36154 | -1.0697  |
| H | 4.15967  | -2.13517 | -2.32663 |
| H | 4.90218  | 0.08283  | -3.50008 |
| H | 4.29376  | 2.69983  | -3.16095 |
| H | 2.65647  | 4.00743  | -1.59162 |
| H | 0.90469  | 5.33894  | -0.16442 |
| H | -0.9217  | 4.64584  | 1.71476  |
| H | -1.6652  | 2.36734  | 2.79828  |
| H | -1.45255 | 1.67397  | -0.66224 |
| H | -2.24637 | 2.74687  | -1.78094 |
| H | -2.91823 | 3.15455  | 0.6772   |
| H | -1.26181 | 0.71936  | -3.09054 |
| H | -2.7579  | 1.18818  | -3.8566  |
| H | -3.81297 | -2.29306 | -1.43591 |
| H | -5.34803 | -1.52353 | -1.70708 |
| H | -4.69066 | -0.75121 | 0.71303  |
| H | -2.28175 | -1.03235 | -4.69486 |
| H | -1.85904 | -1.63108 | -3.099   |
| H | -4.66027 | -0.68823 | -3.88782 |
| H | -4.17756 | -2.37289 | -3.81659 |
| H | -0.00351 | -1.0277  | -1.0652  |
| H | -2.44292 | -4.09525 | 0.36644  |
| H | -1.75044 | -1.38099 | 0.48769  |
| H | -4.26867 | 2.86664  | -0.4057  |

$$\Delta E_{\text{solv}} = -2240.13971941$$

$$\Delta G_{\text{correction}} = 0.471571$$

**43-ts**

Charge = 0 Multiplicity = 4

|    |          |          |          |
|----|----------|----------|----------|
| C  | -1.20491 | -2.94691 | -1.04607 |
| N  | -1.68539 | -2.01361 | -0.16387 |
| C  | -2.37014 | -2.71443 | 0.79502  |
| C  | -2.27781 | -4.1212  | 0.53497  |
| C  | -1.56344 | -4.26452 | -0.61101 |
| Fe | -1.57398 | -0.0066  | -0.33709 |
| O  | 0.04283  | -0.07862 | 0.83534  |
| C  | -3.10382 | -2.15264 | 1.82603  |
| C  | -3.29006 | -0.79492 | 2.03432  |
| N  | -2.7517  | 0.20589  | 1.27001  |
| C  | -3.15413 | 1.38498  | 1.84097  |
| C  | -3.98843 | 1.11851  | 2.97409  |
| C  | -4.06766 | -0.23295 | 3.098    |
| C  | -2.76537 | 2.6504   | 1.43163  |
| C  | -1.88812 | 2.92513  | 0.39635  |
| N  | -1.29589 | 1.98597  | -0.40374 |
| C  | -0.50699 | 2.67702  | -1.28272 |
| C  | -0.58249 | 4.0847   | -1.01392 |
| C  | -1.44922 | 4.23918  | 0.01954  |
| C  | 0.24244  | 2.11255  | -2.30056 |
| C  | 0.2864   | 0.76411  | -2.61245 |
| N  | -0.40166 | -0.22888 | -1.95976 |
| C  | -0.07154 | -1.40103 | -2.59028 |
| C  | 0.82944  | -1.13883 | -3.67187 |
| C  | 1.06129  | 0.20158  | -3.67726 |
| C  | -0.46713 | -2.66695 | -2.18328 |
| S  | -3.5072  | 0.11776  | -1.662   |
| H  | -2.91322 | 0.14005  | -2.87286 |
| H  | 1.70006  | 0.77373  | -4.33972 |
| H  | 1.24815  | -1.8985  | -4.3215  |
| H  | -0.13961 | -3.50907 | -2.78803 |
| H  | -1.30126 | -5.17776 | -1.13232 |
| H  | -2.72831 | -4.89142 | 1.14983  |
| H  | -3.59816 | -2.8336  | 2.51402  |
| H  | -4.60192 | -0.81141 | 3.8425   |
| H  | -4.4416  | 1.88029  | 3.59749  |
| H  | -3.16456 | 3.49646  | 1.98522  |
| H  | -1.76619 | 5.15596  | 0.50274  |
| H  | -0.01635 | 4.83741  | -1.54736 |
| H  | 0.86075  | 2.78359  | -2.88892 |
| C  | 2.03941  | 1.2122   | 1.90077  |
| C  | 3.19978  | 0.41044  | 1.72579  |
| C  | 1.97514  | 2.54512  | 1.19065  |
| C  | 4.03116  | 0.59736  | 0.58783  |
| C  | 3.47385  | -0.67271 | 2.72716  |
| C  | 2.0441   | -2.04774 | -0.28367 |

|   |         |          |          |
|---|---------|----------|----------|
| C | 2.74692 | 2.62174  | -0.11043 |
| H | 0.94364 | 2.86691  | 1.01001  |
| C | 5.19555 | -0.32804 | 0.33842  |
| C | 3.7644  | 1.61237  | -0.31102 |
| C | 4.51069 | -1.70207 | 2.29896  |
| H | 2.52613 | -1.15938 | 2.99547  |
| H | 3.80657 | -0.18436 | 3.65789  |
| O | 1.5634  | -2.50734 | 0.72181  |
| O | 2.55897 | 3.52905  | -0.91606 |
| C | 5.6796  | -1.03012 | 1.598    |
| H | 4.89328 | -1.08414 | -0.40221 |
| H | 6.00747 | 0.23249  | -0.13892 |
| H | 4.37171 | 1.71795  | -1.21014 |
| H | 4.84544 | -2.27672 | 3.16947  |
| H | 4.04943 | -2.43105 | 1.61973  |
| H | 6.14796 | -0.30135 | 2.27504  |
| H | 6.45966 | -1.75781 | 1.34809  |
| O | 2.90625 | -2.7008  | -1.07359 |
| H | 3.03051 | -3.58392 | -0.68899 |
| H | 1.84952 | -1.03712 | -0.67506 |
| H | 2.40017 | 3.32666  | 1.84173  |
| H | 1.07564 | 0.5457   | 1.36574  |
| H | 1.65861 | 1.23012  | 2.92816  |
| H | 0.23243 | -1.0001  | 1.07704  |

$$\Delta E_{\text{solv}} = -2240.13764805$$

$$\Delta G_{\text{correction}} = 0.466383$$



Charge = 0 Multiplicity = 4

|    |          |          |          |
|----|----------|----------|----------|
| C  | -2.05875 | -1.67489 | -1.90349 |
| N  | -2.19504 | -0.61403 | -1.04791 |
| C  | -3.4827  | -0.6655  | -0.58255 |
| C  | -4.1665  | -1.79597 | -1.14179 |
| C  | -3.27793 | -2.4316  | -1.95059 |
| Fe | -0.83889 | 0.85129  | -0.7094  |
| O  | -0.00338 | -0.61182 | 0.88077  |
| C  | -4.02732 | 0.21231  | 0.34211  |
| C  | -3.34112 | 1.24259  | 0.96723  |
| N  | -2.03191 | 1.57918  | 0.73227  |
| C  | -1.7372  | 2.59266  | 1.60806  |
| C  | -2.88294 | 2.89608  | 2.41207  |
| C  | -3.88079 | 2.06577  | 2.00736  |
| C  | -0.51623 | 3.2447   | 1.70329  |
| C  | 0.58987  | 3.01076  | 0.90195  |
| N  | 0.65872  | 2.066    | -0.08666 |
| C  | 1.89     | 2.22019  | -0.66998 |
| C  | 2.62099  | 3.27205  | -0.02115 |
| C  | 1.81608  | 3.75738  | 0.95977  |
| C  | 2.36986  | 1.45909  | -1.72242 |
| C  | 1.69815  | 0.39842  | -2.31317 |
| N  | 0.44144  | -0.03445 | -1.97347 |
| C  | 0.21085  | -1.15969 | -2.7233  |
| C  | 1.33951  | -1.4299  | -3.56342 |
| C  | 2.25917  | -0.45892 | -3.31394 |
| C  | -0.93514 | -1.94003 | -2.67115 |
| S  | -1.731   | 2.38291  | -2.33062 |
| H  | -1.0415  | 1.9633   | -3.41118 |
| H  | 3.24141  | -0.32995 | -3.75411 |
| H  | 1.41007  | -2.26307 | -4.25322 |
| H  | -0.97106 | -2.81091 | -3.32132 |
| H  | -3.43099 | -3.32107 | -2.55084 |
| H  | -5.19339 | -2.06608 | -0.92454 |
| H  | -5.0669  | 0.06091  | 0.62312  |
| H  | -4.89717 | 2.00443  | 2.37873  |
| H  | -2.9121  | 3.65821  | 3.18198  |
| H  | -0.43385 | 4.03397  | 2.44649  |
| H  | 2.01789  | 4.5598   | 1.66008  |
| H  | 3.6322   | 3.56315  | -0.27726 |
| H  | 3.37857  | 1.67112  | -2.06773 |
| C  | 2.96304  | -0.48401 | 2.61945  |
| C  | 2.66208  | -1.59853 | 1.92367  |
| C  | 3.79491  | 0.61774  | 2.07487  |
| C  | 3.13313  | -1.7262  | 0.53854  |
| C  | 1.88056  | -2.72835 | 2.55425  |
| C  | -2.6071  | -2.40404 | 1.84573  |

|   |          |          |          |
|---|----------|----------|----------|
| C | 4.3872   | 0.40252  | 0.69529  |
| H | 3.21551  | 1.55531  | 2.02988  |
| C | 2.60338  | -2.84508 | -0.31326 |
| C | 3.97217  | -0.80361 | 0.00245  |
| C | 1.17437  | -3.63679 | 1.55713  |
| H | 1.1728   | -2.32346 | 3.28812  |
| H | 2.58518  | -3.34038 | 3.13797  |
| O | -1.95493 | -1.68634 | 2.56456  |
| O | 5.12589  | 1.23746  | 0.18939  |
| C | 2.13999  | -4.06656 | 0.46531  |
| H | 1.73637  | -2.43602 | -0.85522 |
| H | 3.33459  | -3.10102 | -1.08835 |
| H | 4.32837  | -0.91677 | -1.02098 |
| H | 0.75122  | -4.50246 | 2.07969  |
| H | 0.33728  | -3.09735 | 1.09749  |
| H | 3.0004   | -4.58884 | 0.90845  |
| H | 1.6679   | -4.78128 | -0.21793 |
| O | -3.80247 | -2.89766 | 2.15936  |
| H | -4.03468 | -2.55535 | 3.03804  |
| H | -2.30315 | -2.75557 | 0.84729  |
| H | 4.61119  | 0.86499  | 2.76781  |
| H | 0.80914  | -0.31753 | 1.30928  |
| H | 2.59768  | -0.38131 | 3.64298  |
| H | -0.61886 | -0.87246 | 1.58702  |

$$\Delta E_{\text{solv}} = -2240.21257541$$

$$\Delta G_{\text{correction}} = 0.468335$$
